# Supplementary material for: Seasonal and diurnal variations of methane and carbon dioxide in the Kathmandu Valley in the foothills of the central Himalaya
Source: Copernicus journal article supplement (doi:10.5194/acp-2016-1136), 2017-03-02
Supplement: Supplementary file 1 [file acp-2016-1136-supplement.pdf]

**Supplementary information for “Seasonal and diurnal variations of methane and carbon dioxide in the Kathmandu Valley in the foothills of the central Himalaya”**

Khadak Singh Mahata<sup>1,2\*</sup>, Arnico Kumar Panday<sup>3,4</sup>, Maheswar Rupakheti<sup>1,5</sup>, Ashish Singh<sup>1</sup>, Manish Naja<sup>6</sup>, Mark G. Lawrence<sup>1,2</sup>

[1] Institute for Advanced Sustainability Studies (IASS), Potsdam, Germany

[2] University of Potsdam, Potsdam, Germany

[3] International Centre for Integrated Mountain Development (ICIMOD), Lalitpur, Nepal

[4] University of Virginia, Virginia, USA

[5] Himalayan Sustainability Institute (HIMSI), Kathmandu, Nepal

[6] Aryabhata Research Institute of Observational Sciences (ARIES), Nainital, India

\*Correspondence to: M. Rupakheti ([maheswar.rupakheti@iass-potsdam.de](mailto:maheswar.rupakheti@iass-potsdam.de))

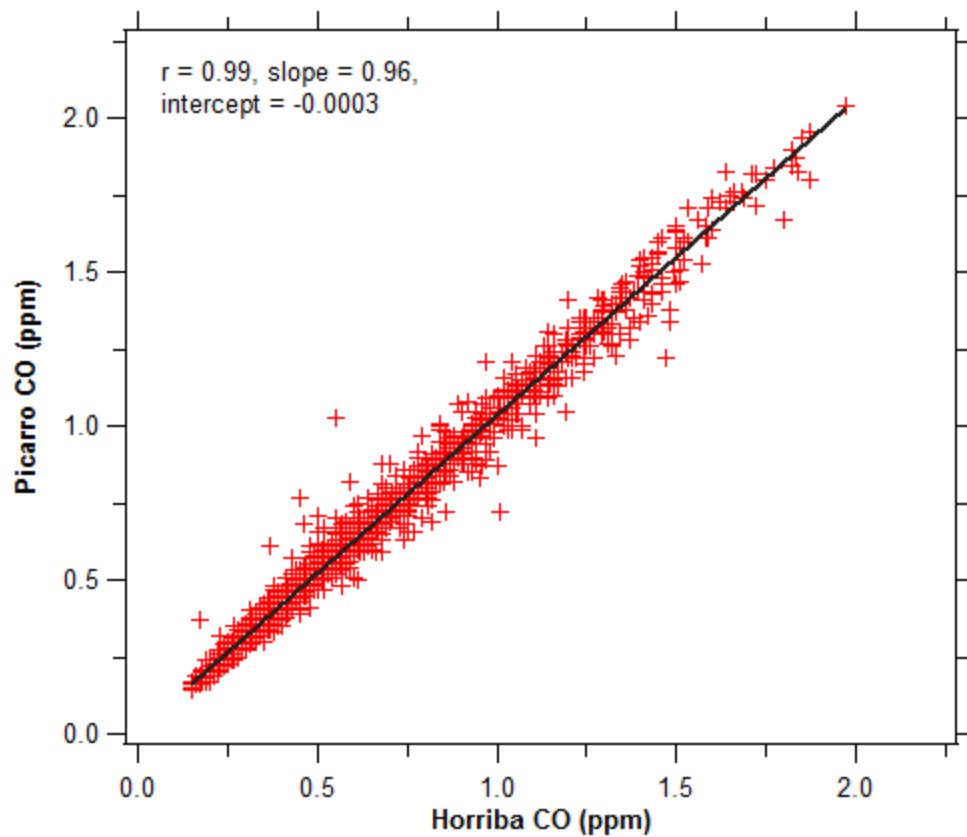

**Figure S1.** Correlation between hourly CO mixing ratios measured simultaneously with a cavity ring down spectrometer (Picarro G2401, USA) and a CO analyzer (Horriba AP370, USA) at Bode, a semi-urban site in the Kathmandu Valley during 6 March to 7 June 2013

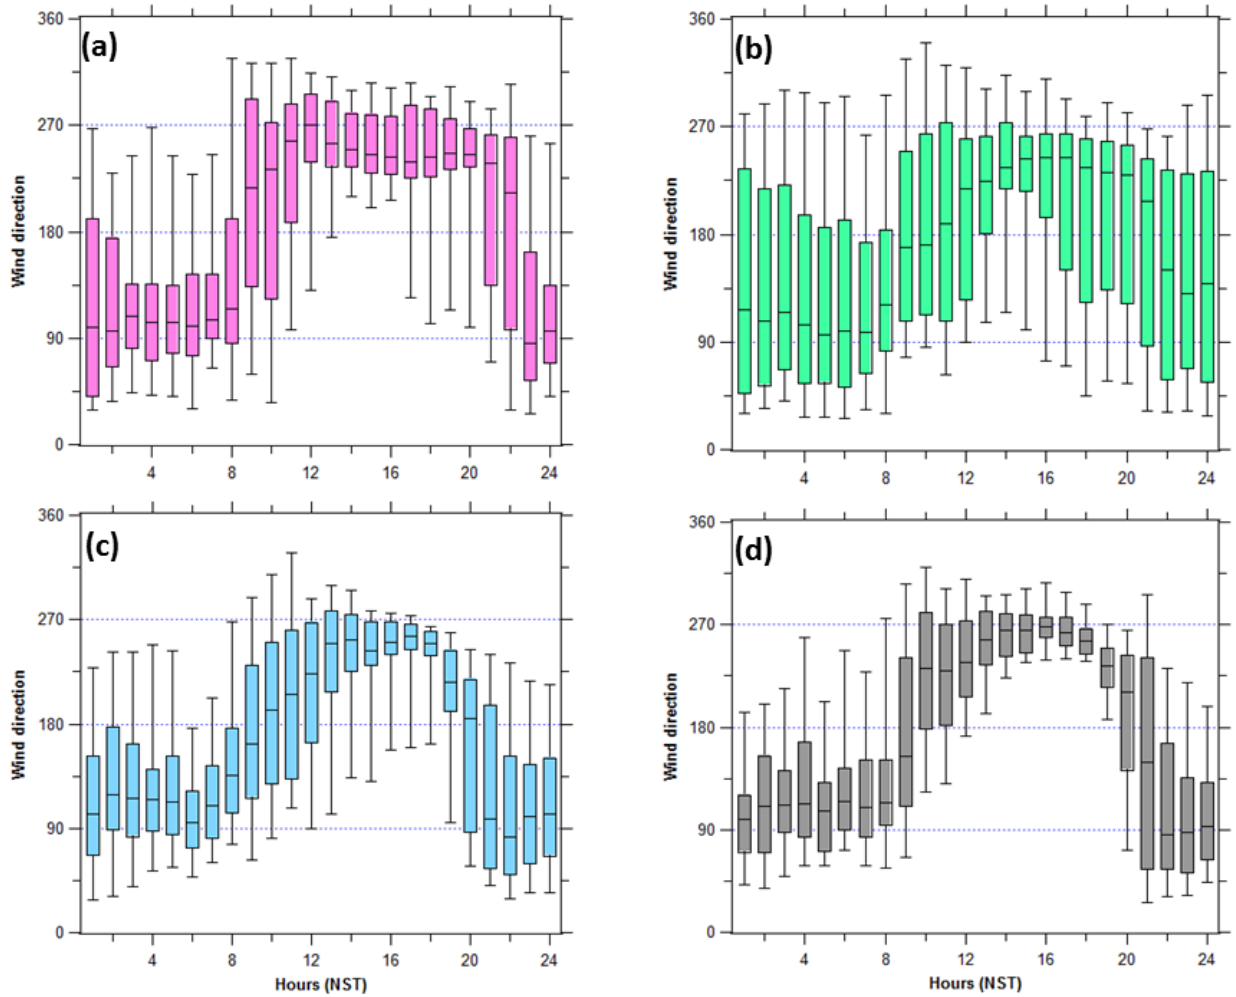

**Figure S2.** Diurnal variation of hourly average wind directions in different seasons; (a) pre-monsoon, (b) monsoon, (c) post-monsoon, and (d) winter season observed at Bode for a year (06 Mar 2013- 04 Mar 2014). Seasons are defined as Pre-monsoon: Mar-May, Monsoon: Jun-Sep, Post-monsoon: Oct-Nov, Winter: Dec-Feb. The lower and upper end of the whisker represents 10<sup>th</sup> and 90<sup>th</sup> percentile, respectively; the lower end and upper end of each box represents 25<sup>th</sup> and 75<sup>th</sup> percentile, respectively, and black horizontal line in the middle of each box is the median for each month. The information on the box and whisker is same for Figure S3.

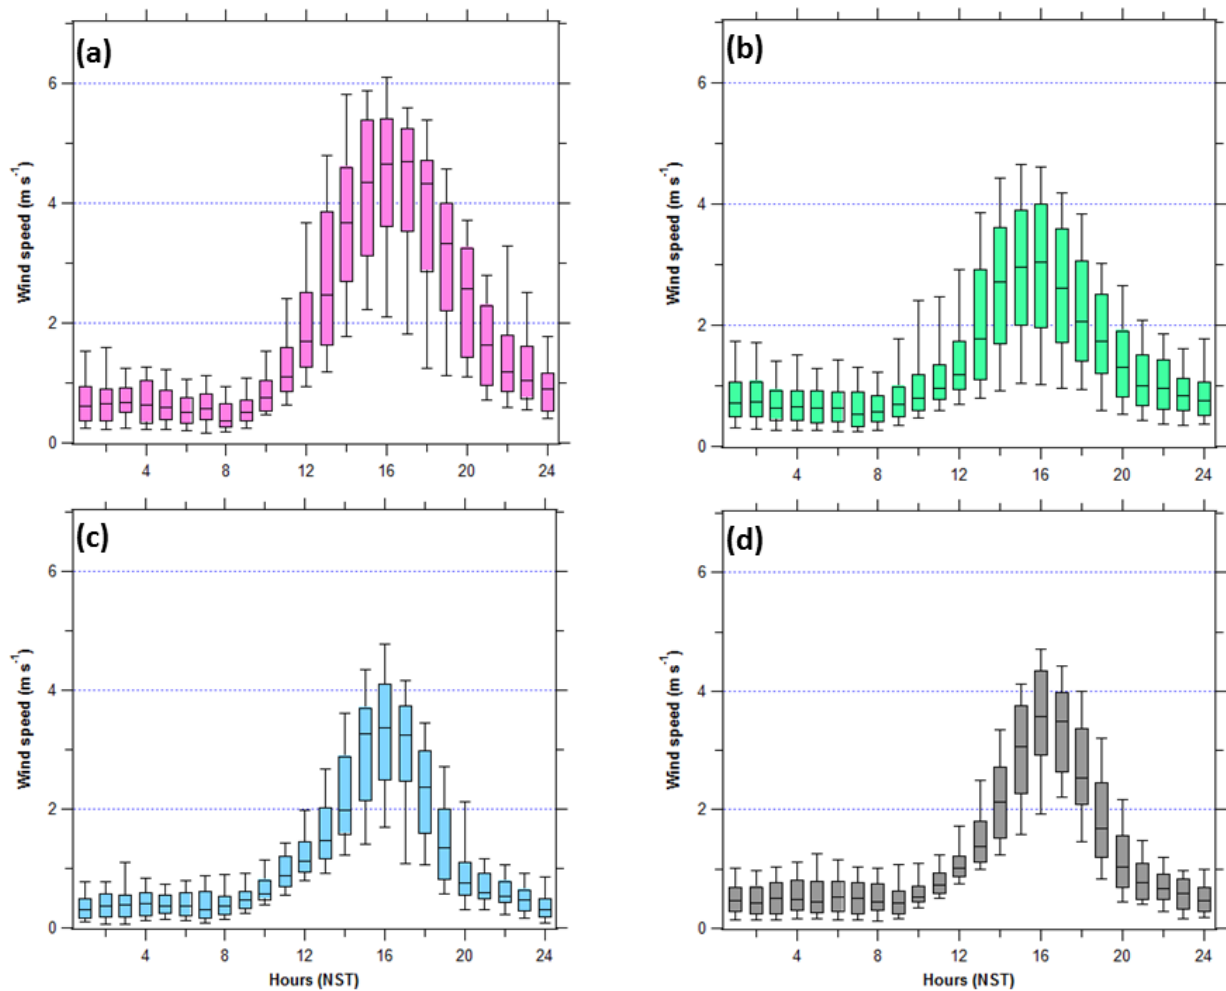

**Figure S3.** Diurnal variation of hourly average wind speeds in different seasons; (a) pre-monsoon, (b) monsoon, (c) post-monsoon and (d) winter season observed for a year (06 Mar 2013- 05 Mar 2014) at Bode.

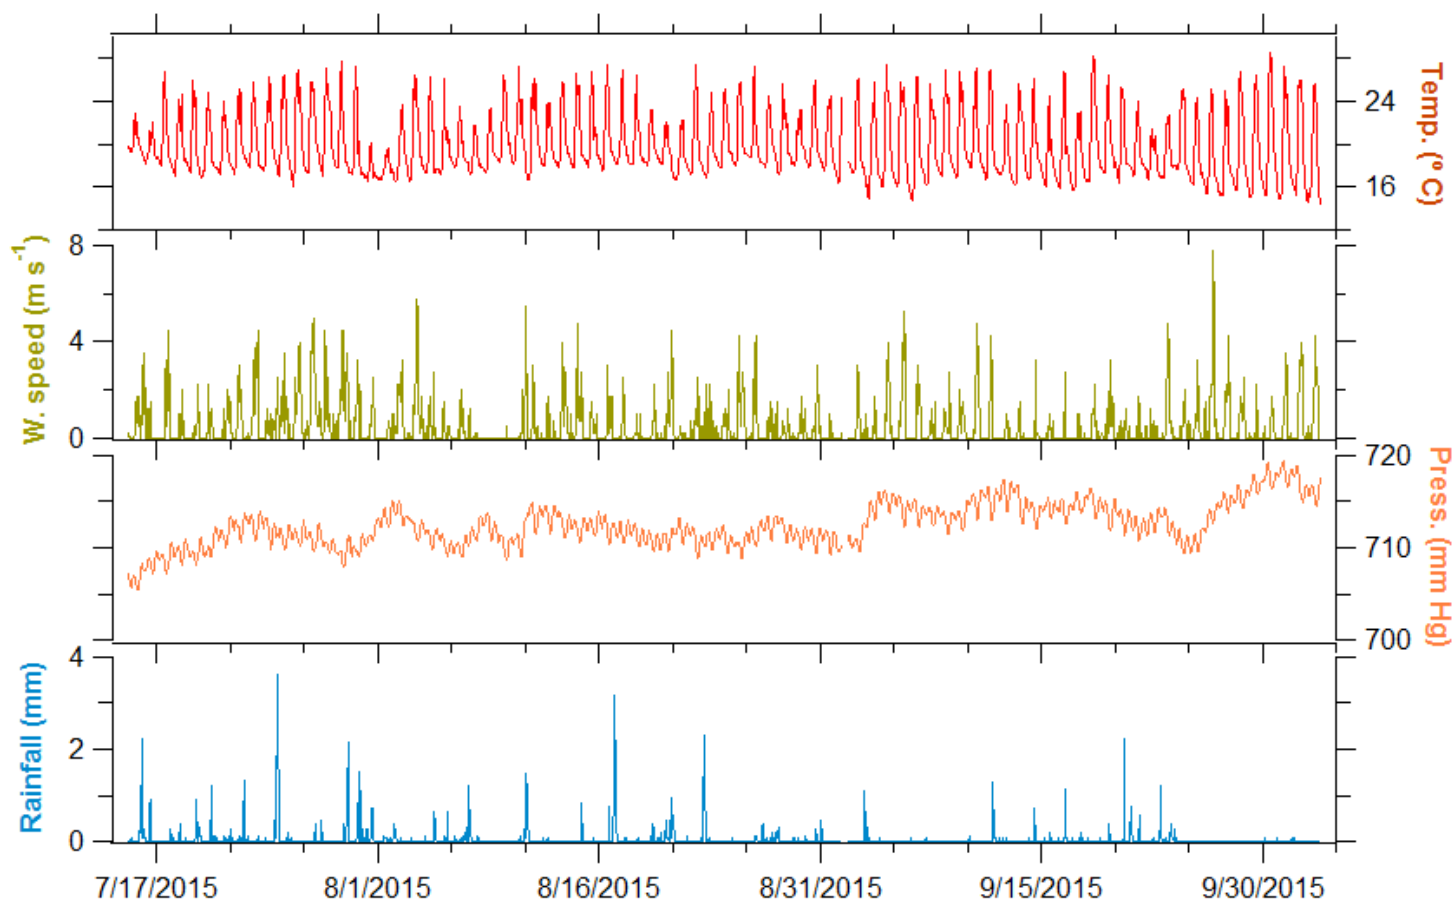

**Figure S4.** Time series of hourly average ambient temperature, wind speed, pressure, and rainfall observed at Chanban, a rural site outside the Kathmandu Valley from 15 July to 03 October 2015.
