# Supplementary material for: Seasonal and diurnal variations of methane and carbon dioxide in the Kathmandu Valley in the foothills of the central Himalaya
Source: Copernicus journal article supplement (doi:10.5194/acp-2016-1136), 2017-03-02
Supplement: Supplementary file [file acp-2016-1136-AC1-supplement.pdf]

July 02, 2017

Dear Editor,

We would like to thank you for serving as the editor for our manuscript. We have revised the manuscript to incorporate all of the general and specific comments and suggestions from the two reviewers. As the reviewers have suggested, we have removed section 3.5 and some sentences in other sections that appeared speculative, where we only had weak evidence to justify our arguments. Similarly, we rephrased several sentences and made them more understandable by adding further information. We believe that with these revisions the interpretation of the findings and hence the quality of the manuscript has improved significantly.

Sincerely yours,

Khadak Singh Mahata on behalf of all coauthors

## **Seasonal and diurnal variations of methane and carbon dioxide in the Kathmandu Valley in the foothills of the central Himalaya**

by Khadak Singh Mahata et al., 2017 (ACPD)

We would like to thank both reviewers for their constructive comments and suggestions. Please find below the reviewers' comments in black, our response in blue and changes in the revised manuscript in red. The line numbers in our response refer to the line numbers in the revised manuscript.

### **Reviewer 1**

General comments: Atmospheric greenhouse gases (GHGs) such as CO<sub>2</sub>, CH<sub>4</sub>, H<sub>2</sub>O and CO are important climate forcing agents having significant impacts on climate system and air quality. This study brings out first continuous measurements of atmospheric GHGs using high precision cavity ring down spectrometer (Picarro 24G2401, USA) at Kathmandu Valley during March 2013 to March 2014. The authors have done an extensive study on GHGs variability with time and space. However, there are a few minor technical changes in the manuscript. This paper is recommended to publish in ACP after incorporating the minor technical corrections.

We would like to thank reviewer for considering that the manuscript contains extensive work on the variability of GHGs in the Kathmandu Valley. We have incorporated the reviewer's comments and suggestions to the extent possible in the following sections of the manuscript.

Line18-20: This paper studies about GHGs and GHGs are not classified as pollutants especially CO<sub>2</sub> and CH<sub>4</sub>. Impact of pollution on GHGs need to be emphasis not to refer GHGs as pollutants. Also sentence "This paper reports ...". May be re-written

We agree with the reviewer that CO<sub>2</sub> and CH<sub>4</sub> at normal ambient concentrations are not considered as pollutants from the health perspective. Thus, we did not describe them as pollutants in the manuscript. We slightly modified the sentence "this paper reports..." to

distinguish the GHGs from the pollutant CO, and thus more understandably reflect what has been looked into in this study.

Line51-53: Not clear. Authors may please check the sentence. “ All three species showed strong diurnal and saying immediately CH<sub>4</sub> and CO did not show any variation: : May be provided quantitative numbers.

Thank you for pointing out that the statement was not clear to the reviewer. Here we are explaining the diurnal variations of CH<sub>4</sub>, CO<sub>2</sub> and CO at two measurement sites (Bode and Chanban). We have articulated it by rephrasing the sentence as follows (lines 52-56):

At Bode, all three gas species (CO<sub>2</sub>, CH<sub>4</sub> and CO) showed strong diurnal patterns in their mixing ratios with a pronounced morning peak (ca. 08:00), a dip in the afternoon, and again gradual increase through the night until the next morning, whereas CH<sub>4</sub> and CO mixing ratios at Chanban did not show any noticeable diurnal variations.

Line139: Rupakheti et al., 2016 need to be updated if available

The Rupakheti et al. manuscript will be submitted to ACPD soon. We have updated the citation as Rupakheti et al. (2017, manuscript in preparation) in line 144-145.

Line252: Sentence “The % may be written as Difference (%) of the analyzer differed by...”.

Corrected. The sentence has been rephrased as follows (lines 258-260):

The difference between CO<sub>2</sub> mixing ratio reported by the analyzer and the reference mixing ratio was within 5%.

Line349: Units of GHGs and other gases should be uniform in the manuscript.

Corrected. They are now reported in ppm throughout the manuscript.

Line395-396: Impact of rainfall on CO<sub>2</sub> dilution process may be supported with reference Mahesh et al., 2014 “Impact of land-sea breeze...”.

Frequent rainfall suppresses emission sources which results in reducing mixing ratios of the gas and aerosol species. To reflect this, we have modified the sentences in lines 414-422:

The concentrations of most pollutants in the region are lower during the monsoon period (Sharma et al., 2012, Marinoni, 2013; Putero et al., 2015) because frequent and heavy rainfall suppresses emission sources. We saw a drop in the CO<sub>2</sub> mixing ratio during the rainfall period due to changes in various processes such as enhanced vertical mixing, uptake of CO<sub>2</sub> by vegetation and soils, and where relevant reduction in combustion sources. CO<sub>2</sub> can also dissolve into rainfall, forming carbonic acid, which may lead to a small decrease in the CO<sub>2</sub> mixing ratio as has been observed during heavy intensity rainfall (Mahesh et al., 2014; Chaudhari et al., 2007).

The following references are added in the list of references.

Mahesh P, Sharma N, Dadhwal VK, Rao PVN, Apparao BV, et al.:Impact of Land-Sea Breeze and Rainfall on CO<sub>2</sub>Variations at a Coastal Station. J. Earth Sci. Clim. Change, 5:201. doi: 10.4172/2157-7617.1000201, 2014.

Chaudhari, P.R., Gajghate, D.G., Dhadse, S. et al. Environ. Monit. Assess., 135: 281. doi:10.1007/s10661-007-9649-7, 2007.

Line432-433: Please check the statement that CO<sub>2</sub> will be high but CH<sub>4</sub> will be high during post-monsoon season.

This comment does not match with the lines mentioned by the reviewer. We did not find the exact or similar sentence in the manuscript.

Figure 4: Titled should be changed. Since GHGs are not pollutants and legend should be CH<sub>4</sub> not Ch<sub>4</sub>.

In order to remove confusion, we have changed the caption of Figure 4 as follows:

**Relation between mixing ratios and wind direction** observed at Bode in the Kathmandu Valley (a) CH<sub>4</sub>, (b) CO<sub>2</sub>, and (c) CO from March 2013 to February 2014. The figure shows variations of CH<sub>4</sub>, CO<sub>2</sub> and CO mixing ratios based on frequency counts of wind direction (in %) as represented by circle. The color represents the different mixing ratios of the gaseous species. The units of CH<sub>4</sub>, CO<sub>2</sub> and CO are in ppm.

The legend is also corrected as suggested.

Figure11: Show double Y-axis for better visualization

Thank you for the suggestion. As individual species varies over a wide range and there is also an order of magnitude difference in their mixing ratios, putting them in double Y-axes with different scales makes the figure more confusing. We have therefore kept the figure as it is.

## **Reviewer 2**

Highly precise and long-term measurements of greenhouse gases are essential to understand the underlying processes in the context of global climate change. It is particularly valuable in regions like Asia where it is currently limited by dedicated long term observations. This study demonstrates the observational variations of CO<sub>2</sub> and CH<sub>4</sub> mixing ratios in the Kathmandu Valley (Nepal), and compares them to those of other rural sites. The scope of this study is hence highly relevant to the public and authors' efforts on this regard need to be appreciated. However, the manuscript in its present form does not meet the standard to merit the publication in ACP, and needs to be adequately revised. I therefore recommend the current manuscript to undergo major revision to be considered in ACP.

We would like to thank reviewer for considering our measurements as important for the region and that the scope of our study is relevant to the public. We have revised the manuscript as suggested by the reviewer.

#### General comments

As mentioned above, I value authors' effort in this study as an important step towards generating observational wealth which can be tremendously used by scientific community to understand a wide range of mechanisms involved in this aspect. Given the complicated interplay of many processes involved, single approach cannot answer the unresolved scientific questions related to these processes and mechanisms affecting mixing ratio variations. This requires defining far more systematic approaches and other robust tools. However the finding from this study can be very valuable if presented with adequate measurement and analysis methods/techniques used, including a good summary of the methods and a much clear report on the observational variations of these analysed tracers. The results will be more convincing by focusing on the key aspects of the data rather than trying to relate them to flux categories based on assumption (many times) and without sufficient tools (inverse modeling). In some places, results are presented nicely, but then an explanation is suggested based on other literature that focussed on other study regions/methods, without even demonstrating its relevance to this dataset. Also in some places, the study gets into overly ambitious interpretations of the results and conclusions on the basis of single analysis. On this basis, I recommend authors to focus on presenting this study by clearly stating the measurement and analysis techniques used, defining their strategies, providing analysed results & possible uncertainties and giving more convincing interpretations of the results and conclusions. I highly recommend authors not to jump to interpreting emission/flux sources and patterns based on the single site measurements and the analysis done in this study. Sections in this manuscript dealing with these aspects needs to be (preferably) removed or highly restructured.

Thank you for the general comments. As per the specific comments below, the analysis techniques are described better. We have focused on the key aspect of the data: (i) better interpretation of the results, as suggested by the reviewer, and (ii) removed speculative sentences and the whole section 3.5, which reviewer found less convincing. Based on our understanding of

the referee's comments, we hope that by addressing all the specific comments collectively we will have adequately addressed the referee's general comments as well.

Specific comments and suggestions for revised analysis

Page 3, lines 63-66 "Between 1750 : : :cover changes" Misleading sentence. The given estimation is overly high for the accumulated CO<sub>2</sub> in the atmosphere. As per IPCC reports & other studies, it is in the range of 230-250 Pg C. The given number is more towards total (cumulative) CO<sub>2</sub> emissions between 1750 and 2011, which were partly compensated by the ocean and terrestrial ecosystems.

We would like to thank reviewer for noticing the misleading sentence which is now corrected with CO<sub>2</sub> accumulation data from the IPCC 2013 report as follows (lines 66-67):

Between 1750 and 2011, 240(±10) PgC of anthropogenic CO<sub>2</sub> was accumulated in the atmosphere.... (IPCC, 2013).

Page 4, line 86-89 "important sources" Give reference

The following papers have been cited (see changed line 90-94) and the full citation is also included in the reference section.

Central Bureau of Statistics (CBS): Nepal Living Standards Survey 2010/11, Statistical Report Volume 1, Central Bureau of Statistics, Government of Nepal, 2011.

Pandey, A., Sadavarte, P., Rao A. B., Venkataraman, C.: Trends in multipollutant emissions from a technology-linked inventory for India: II. Residential, agricultural and informal industry sectors, Atmos. Environ., 99, 341-352, doi: 10.1016/j.atmosenv.2014.09.080, 2014.

Sinha, V., Kumar, V., and Sarkar, C.: Chemical composition of pre-monsoon air in the Indo-Gangetic Plain measured using a new air quality facility and PTR-MS: high surface ozone and strong influence of biomass burning, Atmos. Chem. Phys., 14, 5921-5941, 10.5194/acp-14-5921-2014, 2014.

Page 4, lines 90-92 “Ecosystem and : : :.. between July-October Please give appropriate reference for this statement. Prasad et al., 2014 investigated based on satellite GHG concentration observations, not based on inverse or ecosystem models. In my knowledge there’s no such inverse flux estimations available over South Asia, accounting (and decoupling) seasonal variations of CO<sub>2</sub> uptake and release to the atmosphere. However, Patra et al., 2011 showed inverse estimations of monthly co<sub>2</sub> fluxes over South Asia. Please correct it.

Thank you for pointing out the incorrect statement. The sentences and reference have been replaced by relevant reference in lines 95-100 as follows:

By using **inverse modeling**, Patra et al. (2011) **found a net CO<sub>2</sub> uptake ( $0.37 \pm 0.20$  Pg C yr<sup>-1</sup>) during 2008 in South Asia and the uptake (sink) is highest during July-September. The remaining months act as a weak gross sink but a moderate gross source for CO<sub>2</sub> in the region.**

Page 12, lines 308-310 “2.193 ( $\pm$  0.224) ppm, 419.4 ( $\pm$  23.9) ppm, 0.50 ( $\pm$  0.35) ppm, and 310 1.71 ( $\pm$  0.71) %” Uncertainty seems to be quite high for co<sub>2</sub>, ch<sub>4</sub> and co. Why? Please include the reason in the text.

We apologize for not clarifying about the values in the parenthesis adjacent to the annual average value for the three species. They are not measurement uncertainties. Instead, they are one standard deviation, calculated from the hourly data for the observation period (of one year). The reported annual mean from the references sites such as Mauna Loa and referred to in this paper were calculated from monthly means, not hourly data. Therefore for consistency and ease of comparison, we have now reported annual average and the standard deviation from monthly mean data for all sites. Please see the correction (lines 316-322):

For the entire sampling period, the annual average ( $\pm$  one standard deviation) of CH<sub>4</sub>, CO<sub>2</sub>, CO, and water vapor mixing ratios at Bode were 2.192 ( $\pm$  0.066) ppm, 419.3 ( $\pm$  6.0) ppm, 0.50 ( $\pm$  0.23) ppm, and 1.73 ( $\pm$  0.66)% respectively. The relative variabilities for CH<sub>4</sub>, CO<sub>2</sub> and CO were thus 3%, 1.4% and 46%, respectively. Their variabilities at Mauna Loa were CH<sub>4</sub>: 6% and CO<sub>2</sub>: 0.5% and at Waligaun were CH<sub>4</sub>: 0.48%, CO<sub>2</sub>: 0.9%. The high variability in the annual mean,



notably for CO in Bode could be indicative of the seasonality of emission sources and meteorology.

Page 12, lines 318-320 “CH<sub>4</sub> was : : :.. observation period” Given the above uncertainty ranges of Bode values (nearly 10.2% for CH<sub>4</sub>, 5.7% for CO<sub>2</sub> and 70% for CO), the estimated percentages of increment relative to other observatories are also biased. These uncertainties need to be taken into account, or at least properly mentioned.

As noted above, these are not uncertainties, rather variabilities. We have recalculated the annual average and standard deviation values based on monthly average data. Now, the variabilities for CH<sub>4</sub>, CO<sub>2</sub> and CO at Bode are 3%, 1.4% and 46%, respectively. The comparison between Bode and the other sites (Mauna Loa and Waliguan) for the GHGs now looks more reasonable. The following text has been inserted to reflect their variabilities and statistical significance (lines 330-334)

We performed a significance test at 95% confidence level (t-test) of the annual mean values between the sites to evaluate whether the observed difference is statistically significant ( $p < 0.05$ ), which was confirmed for the annual mean CH<sub>4</sub> and CO<sub>2</sub> between Bode and Mauna Loa, and between Bode and Waliguan.

Page 12, lines 320-322 “The small : : :.. Asia region” Although I tend to agree that we can expect (+ seeing satellite images), most of the cases, higher CH<sub>4</sub> mixing ratios in Asia relative to Mauna Loa observatory, authors should note that this conclusion, as given in the text, about the whole Asia cannot be drawn from analysing “just two Asian sites” in a given time period. This sentence is misleading, and needs to be reformulated.

Thanks for drawing our attention to it. Yes, we didn't intend to generalize our comparison for Asia. We rephrased the following paragraph (lines 334-340):

CH<sub>4</sub> was nearly 20% higher at Bode than at Mauna Loa ( $1.831 \pm 0.110$  ppm) (Dlugokencky et al., 2017) and ca.17% higher than at Mt. Waliguan ( $1.879 \pm 0.009$  ppm) for the same observation

period (Dlugokencky et al., 2016). The slightly higher CH<sub>4</sub> mixing ratios at Bode and Waliguan than at Mauna Loa Observatory could be due to prevalence of rice farming as a key source of CH<sub>4</sub> in this part of Asia.

Page 12, line 324 “Ahmedabad (1.880 ppm) (Sahu and Lal, 2006) and Shadnagar (1.92 ± 0.07)”  
See my above comment on uncertainty.

We have calculated the variabilities for Bode, Ahmedabad and Shadnagar, and rephrased the sentences in lines 340-345 as follows:

Similarly, the annual average CH<sub>4</sub> at Bode during 2013-14 was found comparable to an urban site in Ahmedabad (1.880 ± 0.4 ppm, i.e., variability: 21.3%) in India for 2002 (Sahu and Lal, 2006) and 14% higher than in Shadnagar (1.92 ± 0.07 ppm, i.e., variability: 3.6%), a semi-urban site in Telangana state (~70 km north from Hyderabad city) during 2014 (Sreenivas et al., 2016).

Page 12, lines 326-332 “Likewise, the : : :.. in China” These estimated increments are meaningless based on the uncertainty range of Bode’s tracer mixing ratios. That is, these 5.7% and 5.5 % increments are statistically insignificant when it is compared with CO<sub>2</sub> values with 5.7% uncertainty range. I strongly recommend authors to remove this.

See above regarding the confusion between uncertainty and variability, for which we apologize that this was not clear. We have recalculated the standard deviations based on the monthly values, and have also conducted a t-test between the annual mean mixing ratios and found that differences between the means at Bode and Mauna Loa, and between Bode and Waliguan were statistically significant. We have removed unnecessary explanations and inserted the following sentence (lines 345-348):

Likewise, the difference between annual mean CO<sub>2</sub> mixing ratios at Bode (419.2 ± 6.0 ppm, 1.4% variability) vs. Mauna Loa (396.8 ± 2.0 ppm, 0.5% variability) (NOAA, 2015) and Bode vs. Waliguan (397.7 ± 3.6 ppm, 0.9% variability) (Dlugokencky et al., 2016a) is statistically significant (p < 0.05).

Page 13, lines 354-355 “burning activities due to rainfall in the region” What about the burning activities in Bode area during this rainy period of time?

Similar to Chanban, the burning activities around Bode area were also reduced or absent during the rainy season. We added the following line (378-379) in the manuscript.

The garbage and agro-residue burning activities were also absent or reduced around Bode due to rainfall during the monsoon period.

Page 14, lines 384-385 “The seasonal : : ... residue burn” What about seasonality of atmospheric transport and other met. fields? I would think that it can also make a significant impact especially considering mountain valley effect.

Agree. The paragraph has been restructured in lines 408-414 as:

The seasonal variation in CO<sub>2</sub> could be due to (i) the seasonality of major emission sources such as brick kilns, (ii) seasonal growth of vegetation (CO<sub>2</sub> sink) (Patra et al., 2011) and (iii) atmospheric transport associated with regional synoptic atmospheric circulation (monsoon circulation and westerly disturbance in spring season) which could transport regional emission sources from vegetation fires and agriculture residue burning (Putero et al., 2015), and a local mountain-valley circulation effect (Kitada and Regmi, 2003; Panday et al., 2009).

Page 14, lines 388 “partially due to rain washout. “ It can also very well due to relatively high advection and vertical mixing.

Thank you for pointing out other possible reasons of low mixing ratios of gas species in rainy season. They are included (lines 414-422):

The concentrations of most pollutants in the region are lower during the monsoon period (Sharma et al., 2012, Marinoni, 2013; Putero et al., 2015) because frequent and heavy rainfall

suppresses emission sources. We saw a drop in the CO<sub>2</sub> mixing ratio during the rainfall period due to changes in various processes such as enhanced vertical mixing, uptake of CO<sub>2</sub> by vegetation and soils, and where relevant reduction in combustion sources. CO<sub>2</sub> can also dissolve into rainfall, forming carbonic acid, which may lead to a small decrease in the CO<sub>2</sub> mixing ratio as has been observed during heavy intensity rainfall (Mahesh et al., 2014; Chaudhari et al., 2007).

Page 15, lines 395-396 “related to less or no rainfall, which results in the absence of rain washout” if it is with transport or raining, it should also affect CH<sub>4</sub> and other tracers. Please clarify.

The additional source of CH<sub>4</sub> is due to agricultural activities from the paddy fields in the monsoon season (esp. August-September) which is absent from October. Therefore we see the drop in CH<sub>4</sub> starting October. It is likely that the absence of rainfall after October is conducive to CO<sub>2</sub> accumulation and thus we see an increase in the mixing ratio of CO<sub>2</sub> thereafter. We have tried to clarify it in lines 432-433 as:

However, the reduction in ambient CH<sub>4</sub> after October could be due to reduced CH<sub>4</sub> emissions from paddy fields, which were high in August-September.

Page 15, lines 412-413 “which had > 2.5 ppm CH<sub>4</sub> and > 450 CO<sub>2</sub>” It’s likely that the increase in CO<sub>2</sub> & CH<sub>4</sub> is associated with advected signals from the North East and the East; however it is not clear how it can be interpreted as the advected air mass had the said values for CO<sub>2</sub> and CH<sub>4</sub> unless the study used any tracer transport and emission models. Wind direction and tracer concentration from the given site alone are not sufficient to conclude this. A clarification is needed here. Otherwise I recommend authors to remove this. Page 15, lines 414 “(not shown in Figure 4)” I encourage authors to show CO as well for the completeness of the interpretation.

We agree that in the absence of tracer transport and emission modeling, it is not sufficient to conclude the directionality of the advected signals. The sentence formulation also gave an

impression that we are definitive about our conclusion. We have revised the lines 448-452. And CO has been included in Figure 4 as suggested by reviewer.

In the absence of tracer model simulations, the directionality of the advected air masses is unclear. Figure 4 shows that during these two months, CO<sub>2</sub> mixing ratios were particularly high (> 450 CO<sub>2</sub> and > 2.5 ppm CH<sub>4</sub>) with the air masses coming from the Northeast-East (NE-E).

Page 15, lines 417 “high CH<sub>4</sub> emissions” What about CO<sub>2</sub>?

The CO<sub>2</sub> level is lower during monsoon period in Asia due to high uptake of CO<sub>2</sub> by plants (high photosynthetic activities). This has been mentioned in lines 95-100 and 422-423 in the manuscript with reference.

Page 17, line 455 “The westerly circulation (originated at longitude about 60E in 5 days back trajectories)” What does it mean? What’s originated? Talking about model? Based on modeled trajectories?

The air mass back trajectory analysis is based on the study by Putero et al., 2015 for a site in the Kathmandu Valley for the period February 2013-January 2014. Using the Hysplit trajectory model, Putero et al (2015) clustered/grouped the 5 day back trajectories into a total of 9 clusters. The “westerly circulation” referred to in the manuscript is one of the dominant clusters (21.4%) observed by Putero. If spatially viewed on a lambert conformal projection, the majority of individual trajectories in the westerly circulation “or westerly cluster” originates in the region of 20-40° N, ~60° E.

We acknowledge that the sentence was confusing. Please see the following correction which, we hope, provides a fairly detailed and clear explanation (lines 495-504).

To relate the influence of synoptic circulation with the observed variability in BC and O<sub>3</sub> in the Kathmandu Valley, 5-day back trajectories (of air masses arriving in the Kathmandu Valley) were computed by Putero et al., (2015) using the HYSPLIT model. These individual trajectories which were initialized at 600 hPa, for the study period of one year, and were clustered into nine

clusters. Of the identified clusters, the most frequently observed clusters during the study period were the Regional and Westerly cluster or circulation (22% and 21%). The trajectories in the regional cluster originate within  $10^{\circ} \times 10^{\circ}$  around the Kathmandu Valley, whereas the majority of trajectories in this westerly cluster originated broadly around  $20\text{-}40^{\circ}$  N,  $\sim 60^{\circ}$  E. Putero et al (2015) found that the regional and westerly synoptic circulation were favorable for high values of BC and  $\text{O}_3$  in the Kathmandu Valley.

Page 17, lines 475-476 “CO<sub>2</sub> mixing ratios whereas CO shows an evening peak” It’s surprising. Why is it so? Please clarify.

We meant to say that the CO<sub>2</sub> and CH<sub>4</sub> keep increasing over evening time until early morning while CO shows a peak coinciding with evening peak traffic hour and then drops. The decay in CO is more pronounced in monsoon and post-monsoon seasons. We have tried to clarify further in lines 526-534.

The gradual increase of CO<sub>2</sub> and CH<sub>4</sub> mixing ratios in the evening in contrast to the increase until evening peak traffic hours and later decay of CO may be indicative of a few factors. As pointed out earlier, after the peak traffic hours, there are no particularly strong sources of CO, especially in the monsoon and post-monsoon season. It is also likely that some of the CO decay is due to nighttime katabatic winds which replace polluted air masses with cold and fresh air from the nearby mountain (Panday and Prinn, 2009). As for the CO<sub>2</sub>, the biosphere respiration at night in the absence of photosynthesis can add additional CO<sub>2</sub> to the atmosphere, which especially in the very shallow nocturnal boundary layer may explain part of the increase of the CO<sub>2</sub> mixing ratio.

Page 19, lines 519-521 “While the : : ... other seasons” I couldn’t follow how it’s related. A clarification is highly needed. What are these other most CO sources mentioned here?

We have tried to make it clear and also included other CO sources in lines 578-581. The new sentences read as:

While the biosphere respire at night, which may cause a notable increase in CO<sub>2</sub> in the shallow boundary layer, most CO sources (transport sector, residential cooking) except brick kilns remain shut down or less active at night.

Page 20, lines 551-559 “Highest day : : ..Mauna Loa andWaliguan” It’s lost. I see many assumptions here rather than convincing statements. What about biospheric activity and its seasonality? mesoscale transport mechanisms?

We acknowledge that the whole paragraph was not clear. We have tried to make it concise and clear and also included some of your suggestions. The paragraph has been revised as follows (lines 612-628):

The highest daytime minimum of CO<sub>2</sub> was observed in the pre-monsoon, followed by winter (Figure 6b). The higher daytime minimum of CO<sub>2</sub> mixing ratios in the pre-monsoon season than in other seasons, especially winter, is interesting. The local emission sources are similar in pre-monsoon and winter and the boundary layer is higher (in the afternoon) during the pre-monsoon (~1200 meters) than in winter (~900 meters) (Mues et al., 2017). Also, the biospheric activity in the region is reported to be higher in the pre-monsoon (due to high temperature and solar radiation) than winter (Rodda et al., 2016). Among various possible causes, transport of CO<sub>2</sub> rich air from outside the Kathmandu Valley has been hypothesized as a main contributing factor, due to regional vegetation fire combined with westerly mesoscale to synoptic transport (Putero et al. 2015). In monsoon and post-monsoon seasons, the minimum CO<sub>2</sub> mixing ratio in the afternoon drops down to 390 ppm, this was close to the values observed at the regional background sites Mauna Loa and Waliguan.

Rodda, S.R., Thumaty, K. C., Jha, C. S. and Dadhwal, V. K.: Seasonal Variations of Carbon Dioxide, Water Vapor and Energy Fluxes in Tropical Indian Mangroves. *Forests*, 7, 35; doi:10.3390/f7020035, 2016.

Page 21, lines 577-579 “Overall, the : : .. fire etc.” Importantly it shares the transport mechanisms.

We would like to thank reviewer for raising the role of transport mechanism in this section and it has been added in lines 647-650. The revised sentence reads as follows:

Overall, the positive and high correlations between CH<sub>4</sub> and CO mixing ratios and between CH<sub>4</sub> and CO<sub>2</sub> in the pre-monsoon and winter indicate common sources, most likely combustion related sources such as vehicular emission, brick kilns, agriculture fire etc., or the same source regions (i.e. their transport from outside the Kathmandu Valley due to regional atmospheric transport mechanisms).

Pages 21-22, Sec. 3.5 I strongly recommend authors to remove the whole section. It is not at all straight forward, as assumed here, to determine the impact of emission sources and transport, based on concentration measurements from single site. It does not make any sense unless a dedicated further study is involved to justify the stated assumptions here. The section, as in the present shape, does not meet scientific reasoning; hence need to be removed.

We are in agreement with the reviewer that without any good supporting evidence, it can be difficult to accept the assumptions made. Thus, as suggested, the whole section has removed from the manuscript and the remaining sections are renumbered.

Page 23, lines 633-641 “Based on the : : :.. post-monsoon seasons” This could be a likely scenario. Have these interpretations been supported by any emission inventories available? It is also important to point out the associated uncertainties involved in separating different emission sectors based on this approach. Note that this approach cannot separate near and far field sources, different lifetimes of tracers etc.

Yes, we agree that the source identification based on CO/CO<sub>2</sub> ratio is indicative, not a definitive evidence. We apologize if we sounded definitive in our sentences and conclusion derived from the ratio analysis. We have also stated clearly in the paragraph that this method or the values associated with the source (Table 5) or our estimated values may have large uncertainty. A few additional lines have been added 680-682 to convey our cautious approach. Although we were



unable to estimate the standard deviation of the ratio in Table 5, we have included the standard deviation of our calculated ratio in Table 6, and added useful statistics such as geometric mean and geometric standard deviation and their upper and lower bounds. The whole paragraph is significantly modified, and as supporting evidence, we also have added emission source sectors in the Kathmandu Valley based on a high resolution emission inventory (Sadavarte et al., 2017, in preparation).. Here is the modified paragraph (lines 715-730):

Although ratio of CO/CO<sub>2</sub> is a weak indicator of sources and the mean ratio has large variance (See Table 6), the conclusions drawn from using Figure 8 and the above mentioned classification are not conclusive. The estimated CO/CO<sub>2</sub> ratio tentatively indicates that the local plume impacting the measurement site (Bode) from the north and east could be residential and/or diesel combustion. The estimated CO/CO<sub>2</sub> ratio of the local plume from the south and west generally falls in the 15-45 range, which could indicate emissions from brick kilns and inefficient gasoline vehicles. Very high ratios were also estimated from the south west during the post-monsoon season. Among other possible sources, this may indicate agro-residue open burning.

The emission inventory for CO identifies (aggregate for a year) residential, and gasoline related emission from transport sector (Sadavarte et al., 2017, in preparation). The inventory is not yet temporally resolved, so no conclusion can be drawn about the sources with respect to different seasons. From the 1km x1km emission inventory of the Kathmandu Valley for 2011, the estimated sectoral source apportionment of CO is residential (37%), transport sector (40%) and industrial (20%). The largest fraction from the residential sector is cooking (24%) whereas the majority of transport sector related CO in the Kathmandu Valley is from gasoline vehicles.

Reference:

Sadavarte P., Das B., Shakya K., Rupakheti M., Bhave P. V., Byanju R. M., Lawrence M. G.: A High Resolution Technology-based Bottom-up Emissions Inventory for Nepal (manuscript in preparation ), 2017.

Page 25, lines 704-706 “but it is clear that” What makes it clear?

We have removed the confusing words and rephrased the sentence in lines 793-795 as:

The cause of this diurnal pattern at Chanban is presently unclear, but the levels **could be** representative of the regional background throughout the day and show only limited influences of local emissions.

Page 26, lines 731-732 “Regional transport : : ... during pre-monsoon” – I don’t see any valid justification for this throughout.

The sentence has been removed from the conclusion section because we also realized that there is not a justifiable connection with the result presented in the manuscript.

Page 27, lines 743-744 “Low values : : ... mixing ratios.” Please provide supporting details.

We have rephrased the sentence (lines 832-833):

Low values of CH<sub>4</sub> and CO<sub>2</sub> mixing ratios at the Chanban site **could** represent regional background mixing ratios.

Page 27, line 746 “useful for evaluation of satellite measurements and climate” How?

We have included the reason how the measurement is useful for satellite evaluation and rephrased the sentence to make it clear (lines 835-837):

**These observations can be** useful **as ground-truthing** for evaluation of satellite measurements, **as well as** climate and regional air quality models.

Page 27, lines 747-749 “The analysis ... Kathmandu Valley”, Please, remove this sentence. Note that this is not met here and the study only demonstrates the observational variations of GHGs in the study region.

We agree with the reviewer that this study focuses on observational variations of mainly CH<sub>4</sub> and CO<sub>2</sub>. However, this study along with recent studies will help in addressing mitigation of the pollution in the study region. Thus, we have rephrased the sentence in lines 837-839as:

The overall analysis presented in the paper will contribute along with other recent measurements and analysis to providing a sound scientific basis for reducing emissions of greenhouse gases and air pollutants in the Kathmandu Valley.

Reference Please check. Formatting issues and sometimes journal details (or other important parts) are missing

We have re-checked the references and tried to resolve formatting and other issues in the section.

Table 4 Columns 4 & 5: What are these values? Looks like monthly values for Bode during Aug., and Sep. 2013; but then why are they different from corresponding 2<sup>nd</sup> column of the table 4?

These are monthly values for Bode, which were simultaneously measured with another site at Chanban during August and September 2015. The information has been included in Table 4.

Table 6 Column 2: This “\*” meant for?

We would like to thank reviewer for noticing this symbol. The meaning of the symbol has been included with a note at the bottom of the Table 6 as:

\*The morning peak was one hour delayed in winter, thus the 8:00-10:00 period data was used in the analysis.

Figure 4 I didn't follow the fig. well. What I understood is that the plot shows the frequency of hourly mixing ratios w.r.t the frequency of prevailing wind direction. Did it also take into account the wind speed? Then what about different percentages shown? For example, does it

mean that 5% of sample time in August, the wind was from NE and “CH<sub>4</sub>\_corrected” is above 2.5 ppm in which less than 1% time (in my eyes), CH<sub>4</sub> is in 3-3.3 ppm range? In that case, it’s statistically difficult to say that the monthly enhancement is due to the polluted air masses from the NE and E. By the way, what are these “\_corrected” values for CH<sub>4</sub> and CO<sub>2</sub>? What about March-April scenario for CO<sub>2</sub>\_corrected? Did two plots (Figs.2 and 3) use same set of master data, or any quality filtering had been done other than monthly averaging?

We are sorry for creating confusion by keeping “CH<sub>4</sub>\_corrected” in the legend of Figure 4. CO<sub>2</sub> and CH<sub>4</sub> corrected means water corrected values of them, which we explained in section 2.2..... The CH<sub>4</sub> and CO<sub>2</sub> data used in the whole analysis (including Figure 2 and 3) are the same and they are water corrected values. We did not use any additional filtering while making these plots in the analysis. To avoid confusion, we have replaced CH<sub>4</sub>\_corrected and CO<sub>2</sub>\_corrected by CH<sub>4</sub> and CO<sub>2</sub> respectively in the legend of Figure 4.

1 **Seasonal and diurnal variations of methane and carbon dioxide in the Kathmandu Valley**  
2 **in the foothills of the central Himalaya**

3 Khadak Singh Mahata<sup>1,2</sup>, Arnico Kumar Panday<sup>3,4</sup>, Maheswar Rupakheti<sup>1,5\*</sup>, Ashish Singh<sup>1</sup>,  
4 Manish Naja<sup>6</sup>, Mark G. Lawrence<sup>1,2</sup>

5 [1] Institute for Advanced Sustainability Studies (IASS), Potsdam, Germany

6 [2] University of Potsdam, Potsdam, Germany

7 [3] International Centre for Integrated Mountain Development (ICIMOD), Lalitpur, Nepal

8 [4] University of Virginia, Virginia, USA

9 [5] Himalayan Sustainability Institute (HIMSI), Kathmandu, Nepal

10 [6] Aryabhata Research Institute of Observational Sciences (ARIES), Nainital, India

11

12 \*Correspondence to: M. Rupakheti ([maheswar.rupakheti@iass-potsdam.de](mailto:maheswar.rupakheti@iass-potsdam.de))

13

14 **Abstract**

15 The SusKat-ABC (Sustainable Atmosphere for the Kathmandu Valley- Atmospheric Brown  
16 Clouds) international air pollution measurement campaign was carried out during December  
17 2012-June 2013 in the Kathmandu Valley and surrounding regions in Nepal. The Kathmandu  
18 Valley is a bowl-shaped basin with a severe air pollution problem. This paper reports  
19 measurements of two major greenhouse gases (GHGs), methane (CH<sub>4</sub>) and carbon dioxide  
20 (CO<sub>2</sub>), along with the pollutant CO, that began during the campaign and were extended for a  
21 year at the SusKat-ABC's supersite in Bode, a semi-urban location in the Kathmandu Valley.  
22 Simultaneous measurements were also made during 2015 in Bode and at a nearby rural site  
23 (Chanban), ~25 km (aerial distance) to the southwest of Bode, on the other side of a tall ridge.  
24 The ambient mixing ratios of methane (CH<sub>4</sub>), carbon dioxide (CO<sub>2</sub>), water vapor, and carbon  
25 monoxide (CO) were measured with a cavity ring down spectrometer (Picarro G2401, USA),

26 along with meteorological parameters for a year (March 2013 - March 2014). ~~Simultaneous~~  
27 ~~measurements were also made at Chanban from 15 July to 3 October 2015.~~ These measurements  
28 are the first of their kind in the central Himalayan foothills. At Bode, the annual average mixing  
29 ratios of CO<sub>2</sub> and CH<sub>4</sub> were 419.34(±236.09) ppm and 2.1923(±0.066224) ppm, respectively.  
30 These values are higher than the levels observed at background sites such as Mauna Loa, USA  
31 (CO<sub>2</sub>: 396.8 ± 2.0 ppm, CH<sub>4</sub>: 1.831 ± 0.110 ppm) and Waliguan, China (CO<sub>2</sub>: 397.7 ± 3.6 ppm,  
32 CH<sub>4</sub>: 1.879 ± 0.009 ppm) during the same period, and at other urban/semi-urban sites in the  
33 region such as Ahmedabad and Shadnagar (India) ~~and Nanjing (China)~~. They varied slightly  
34 across the seasons at Bode, with seasonal average CH<sub>4</sub> mixing ratios being 2.157(±0.230) ppm in  
35 the pre-monsoon season, 2.199(±0.241) ppm in the monsoon, 2.210(±0.200) ppm in the post-  
36 monsoon, and 2.214(± 0.209) ppm in the winter season. The average CO<sub>2</sub> mixing ratios were  
37 426.2(±25.5) ppm in pre-monsoon, 413.5(±24.2) ppm in monsoon, 417.3(±23.1) ppm in post-  
38 monsoon, and 421.9(±20.3) ppm in winter season. The maximum seasonal mean mixing ratio of  
39 CH<sub>4</sub> in winter was only 0.057 ppm or 2.6% higher than the seasonal minimum during the pre-  
40 monsoon period, while CO<sub>2</sub> was 12.8 ppm or 3.1% higher during the pre-monsoon period  
41 (seasonal maximum) than during the monsoon (seasonal minimum). On the other hand, the CO  
42 mixing ratio at Bode was 191% higher during the winter than during the monsoon season. The  
43 enhancement in CO<sub>2</sub> mixing ratios during the pre-monsoon season is associated with additional  
44 CO<sub>2</sub> emissions from forest fire and agro-residue burning in northern South Asia in addition to  
45 local emissions in the Kathmandu Valley. Published CO/CO<sub>2</sub> ratios of different emission sources  
46 in Nepal and India were compared with the observed CO/CO<sub>2</sub> ratios in this study. This  
47 comparison indicated that the major sources in the Kathmandu Valley were residential cooking  
48 and vehicle exhaust in all seasons except winter. In winter, the brick kiln emissions were a major  
49 source. Simultaneous measurement in Bode and Chanban (15 July-3 Oct 2015) revealed that the  
50 mixing ratio of CO<sub>2</sub>, CH<sub>4</sub> and CO mixing ratios were 3.8%, 12%, and 64% higher in Bode than  
51 Chanban. Kathmandu Valley, thus, has significant emissions from local sources, which can also  
52 be attributed to its bowl shaped geography that is conducive to pollution build-up. ~~At Bode, A~~  
53 ~~all three gas species (CO<sub>2</sub>, CH<sub>4</sub> and CO) in Bode~~ showed strong diurnal patterns ~~in their mixing~~  
54 ~~ratios with a pronounced morning peak (ca. 08:00), a dip in the afternoon, and again gradual~~

55 increase through the night until the next morning, whereas CH<sub>4</sub> and CO at Chanban did not show  
56 any noticeable diurnal variations.

57 These measurements provide the first insights into diurnal and seasonal variation of key  
58 greenhouse gases and air pollutants and their local and regional sources, which are important  
59 information for the atmospheric research in the region.

## 60 **1 Introduction**

61 The average atmospheric mixing ratios of two major greenhouse gases (GHGs), CO<sub>2</sub> and CH<sub>4</sub>,  
62 have increased by about 40% (from 278 to 390.5 ppm) and about 150% (from 722 to 1803 ppb)  
63 respectively since pre-industrial times (~1750 AD). This is mostly attributed to anthropogenic  
64 emissions (IPCC, 2013). The current global annual rate of increase of the atmospheric CO<sub>2</sub>  
65 mixing ratio is 1-3 ppm, with average annual mixing ratios now exceeding a value of 400 ppm at  
66 the background reference location in Mauna Loa (WMO, 2016). Between 1750 and 2011,  
67 240555(±1085) PgC of anthropogenic CO<sub>2</sub> was accumulated added to in the atmosphere of which  
68 two thirds were contributed by fossil fuel combustion and cement production, with the remaining  
69 coming from deforestation and land use/land cover changes (IPCC, 2013). CH<sub>4</sub> is the second  
70 largest gaseous contributor to anthropogenic radiative forcing after CO<sub>2</sub> (Forster et al., 2007).  
71 The major anthropogenic sources of atmospheric CH<sub>4</sub> are rice paddies, ruminants and fossil fuel  
72 use, contributing approximately 60% to the global CH<sub>4</sub> budget (Chen and Prinn, 2006;  
73 Schneising et al., 2009). The remaining fraction is contributed by biogenic sources such as  
74 wetlands and fermentation of organic matter by microbes in anaerobic conditions (Conrad,  
75 1996).

76 Increasing atmospheric mixing ratios of CO<sub>2</sub> and CH<sub>4</sub> and other GHGs and short-lived climate-  
77 forcing pollutants (SLCPs) such as black carbon (BC) and tropospheric ozone (O<sub>3</sub>) have caused  
78 the global mean surface temperature to increase by 0.85°C from 1880 to 2012. The surface  
79 temperature is expected to increase further by up to 2 degrees at the end of the 21<sup>st</sup> century in  
80 most representative concentration pathways (RCP) emission scenarios (IPCC, 2013). The  
81 increase in surface temperature is linked to melting of glaciers and ice sheets, sea level rise,

82 extreme weather events, loss of biodiversity, reduced crop productivity, and economic losses  
83 (Fowler and Hennessy, 1995; Guoxin and Shibasaki, 2003).

84 Seventy percent of global anthropogenic CO<sub>2</sub> is emitted in urban areas (Fragkias et al., 2013).  
85 Developing countries may have lower per capita GHG emissions than developed countries, but  
86 the large cities in developing countries, with their high population and industrial densities, are  
87 major consumers of fossil fuels and thus, emitters of GHGs. South Asia, a highly populated  
88 region with rapid growth in urbanization, motorization, and industrialization in recent decades,  
89 has an ever increasing fossil fuel demand and its combustion emitted 444 Tg C/year in 2000  
90 (Patra, et al., 2013), or about 5% of the global total CO<sub>2</sub> emissions. Furthermore, a major  
91 segment of the population in South Asia has an agrarian economy and uses biofuel for cooking  
92 activities, and agro-residue burning is also common practice in the region, which are ~~are~~ ~~an~~  
93 important major sources of air pollutants and greenhouse gases in the region (CBS, 2011; Pandey  
94 et al., 2014; Sinha et al., 2014).

95 The emission and uptake of CO<sub>2</sub> and CH<sub>4</sub> follow a distinct cycle in South Asia. By using ~~inverse~~  
96 ~~modeling~~, Patra et al. (2011) ~~found also showed that a~~ net CO<sub>2</sub> uptake ( $0.37 \pm 0.20$  Pg C yr<sup>-1</sup>)  
97 ~~during 2008 in South Asia and the uptake (sink) is highest peaks in~~ during July-September. ~~And~~  
98 ~~the remaining months acts as a weak gross sink but a moderate gross source for CO<sub>2</sub> in the~~  
99 ~~region August, using an inversion constrained by regional measurements from commercial~~  
100 ~~aircraft~~. The observed ~~trend-variation~~ is linked with the growing seasons. Agriculture is a major  
101 contributor of methane emission. For instance, in India it contributes to 75% of CH<sub>4</sub> emissions  
102 (MoEF, 2007). Ambient CH<sub>4</sub> concentrations are highest during June to September (peaking in  
103 September) in South Asia which are also the growing months for rice paddies (Goroshi et al.,  
104 2011). The minimum ~~column averaged ambient~~ CH<sub>4</sub> ~~concentrations mixing ratios~~ are ~~observed~~  
105 in February-March (Prasad et al., 2014).

106 Climate change has impacted South Asia in several ways, as evident in temperature increase,  
107 change in precipitation patterns, higher incidence of extreme weather events (floods, droughts,  
108 heat waves, cold waves), melting of snowfields and glaciers in the mountain regions, and  
109 impacts on ecosystems and livelihoods (ICIMOD, 2009; MoE, 2011). Countries such as Nepal



110 are vulnerable to impacts of climate change due to inadequate preparedness for adaptation to  
111 impacts of climate change (MoE, 2011). Decarbonization of its economy can be an important  
112 policy measure in mitigating climate change. Kathmandu Valley is one of the largest  
113 metropolitan cities in the foothills of the Hindu Kush-Himalaya which has significant reliance on  
114 fossil fuels and biofuels. In 2005, fossil fuel burning accounted for 53% of total energy  
115 consumption in the Kathmandu Valley, while biomass and hydroelectricity were 38% and 9%,  
116 respectively (Shrestha and Rajbhandari, 2010). Fossil fuel consumed in the Kathmandu Valley  
117 accounts for 32% of the country's fossil fuel imports, and the major fossil fuel consumers are  
118 residential (53.17%), transport (20.80%), industrial (16.84%), and commercial (9.11%) sectors.  
119 Combustion of these fuels in traditional technologies such as Fixed Chimney Bulls Trench Kiln  
120 (FCBTK) and low efficiency engines (vehicles, captive power generator sets etc.) emit  
121 significant amounts of greenhouse gases and air pollutants. This has contributed to elevated  
122 ambient concentrations of particulate matter (PM), including black carbon and organic carbon,  
123 and several gaseous species such as ozone, polycyclic aromatic hydrocarbons (PAHs),  
124 acetonitrile, benzene and isocyanic acid (Pudasainee et al., 2006; Aryal et al., 2009; Panday and  
125 Prinn, 2009; Sharma et al., 2012; World Bank, 2014; Chen et al., 2015; Putero et al., 2015;  
126 Sarkar et al., 2016). The ambient levels often exceed national air quality guidelines (Pudasainee  
127 et al., 2006; Aryal et al., 2009; Putero et al., 2015) and are comparable or higher than ambient  
128 levels observed in other major cities in South Asia.

129 Past studies in the Kathmandu Valley have focused mainly on a few aerosols species (BC, PM)  
130 and short-lived gaseous pollutants such as ozone and carbon monoxide (Pudasainee et al., 2006;  
131 Aryal et al., 2009; Panday and Prinn, 2009; Sharma et al., 2012, Putero et al., 2015). To the best  
132 of authors' knowledge, no direct measurements of CO<sub>2</sub> and CH<sub>4</sub> are available for the Kathmandu  
133 Valley. Recently, emission estimates of CO<sub>2</sub> and CH<sub>4</sub> were derived for the Kathmandu Valley  
134 using the International Vehicle Emission (IVE) model (Shrestha et al., 2013). The study  
135 estimated 1554 Gg of annual emission of CO<sub>2</sub> from a fleet of vehicles (that consisted of public  
136 buses, 3-wheelers, taxis and motor cycles; private cars, trucks and non-road vehicles were not  
137 included in the study) for the year 2010. In addition, the study also estimated 1.261 Gg of CH<sub>4</sub>  
138 emitted from 3 wheelers (10.6 %), taxis (17.7 %) and motorcycles (71 %) for 2010.

139 This study presents the first 12 months of measurements of two key GHGs, CH<sub>4</sub> and CO<sub>2</sub> along  
140 with other trace gases and meteorological parameters in Bode, a semi-urban site in the eastern  
141 part of the Kathmandu Valley. The year-long measurement in Bode is a part of the SusKat-ABC  
142 (Sustainable Atmosphere for the Kathmandu Valley – Atmospheric Brown Clouds) international  
143 air pollution measurement campaign conducted in and around the Kathmandu Valley from  
144 December 2012 to June 2013. Details of the SusKat-ABC campaign are described in Rupakheti  
145 et al. (2017<sup>6</sup>, manuscript in preparation). The present study provides a detailed account of  
146 seasonal and diurnal behaviors of CO<sub>2</sub> and CH<sub>4</sub> and their possible sources. To examine the rural-  
147 urban differences and estimate the urban enhancement, these gaseous species were also  
148 simultaneously measured for about three months (Jul-Oct) in 2015 at Chanban, a rural site about  
149 25 km (aerial distance) outside and southwest of Kathmandu Valley. The seasonality of the trace  
150 gases and influence of potential sources in various (wind) directions are further explored by via  
151 ratio analysis. This measurement provides unique data from highly polluted but relatively poorly  
152 studied region (central Himalayan foothills in South Asia) which could be useful for validation  
153 of emissions estimates, model outputs and satellite observations. The study, which provides new  
154 insights on potential sources, can also be a good basis for designing mitigation measures for  
155 reducing emissions of air pollutants and controlling greenhouse gases in the Kathmandu Valley  
156 and the region.

## 157 **2 Experiment and Methodology**

### 158 **2.1 Kathmandu Valley**

159 The Kathmandu Valley consists of three administrative districts: Kathmandu, Lalitpur, and  
160 Bhaktapur, situated between 27.625° N, 27.75° N and 85.25°E, 85.375°E. It is a nearly circular  
161 bowl-shaped valley with a valley floor area of approximately 340 km<sup>2</sup> located at an altitude of  
162 1300 m mean sea level (masl). The surrounding mountains are close to 2000-2800 in height  
163 above sea level with five mountain passes located at about 200-600 m above the valley floor and  
164 an outlet for the Bagmati River southwest of the Kathmandu Valley. Lack of decentralization in  
165 in Nepal has resulted in the concentration of economic activities, health and education facilities,  
166 the service sector, as well as most of the central governmental offices in the Kathmandu Valley.

167 Consequently, it is one of the fastest growing metropolitan areas in South Asia with a current  
168 population of about 2.5 million, and the population growth rate of 4% per year (World Bank,  
169 2013) Likewise, approximately 50% of the total vehicle fleet (2.33 million) of the country is in  
170 Kathmandu Valley (DoTM, 2015). The consumption of fossil fuels such as liquefied petroleum  
171 gas (LPG), kerosene for cooking and heating dominates the residential consumption, while the  
172 rest use biofuel (fuelwood, agro-residue, animal dung) for cooking and heating in the Kathmandu  
173 Valley. The commercial sector is also growing in the valley, and the latest data indicate the  
174 presence of 633 industries of various sizes. These are mainly associated with dyeing, brick kilns,  
175 and manufacturing industries. Fossil fuels such as coal and biofuels are the major fuels used in  
176 brick kilns. Brick kilns are reported as one of the major contributors of air pollution in the  
177 Kathmandu Valley (Chen et al., 2015; Kim et al., 2015; Sarkar et al., 2016). There are about 115  
178 brick industries in the valley (personal communication with M. Chitrakar, President of the  
179 Federation of Nepalese Brick Industries). Acute power shortage in the Valley is common all  
180 around the year, especially in the dry season (winter/pre-monsoon) when the power cuts can last  
181 up to 12 hours a day (NEA, 2014). Energy demand during the power cut period is met with the  
182 use of small (67% of 776 generators surveyed for the World Bank study was with capacity less  
183 than 50kVA) but numerous captive power generators (diesel/petrol), which further contribute to  
184 valley's poor air quality. According to the World Bank's estimate, over 250,000 such generator  
185 sets are used in the Kathmandu Valley alone, producing nearly 200 MW of captive power, and  
186 providing about 28% of the total electricity consumption of the valley (World Bank, 2014).  
187 Apart from these sources, trash burning, which is a common practice (more prevalent in winter)  
188 throughout the valley, is one of the major sources of air pollutants and GHGs.

189 Climatologically, Kathmandu Valley has a sub-tropical climate with annual mean temperature of  
190 18°C, and annual average rainfall of 1400 mm, of which 90% occurs in monsoon season (June-  
191 September). The rest of the year is dry with some sporadic rain events. The wind circulation at  
192 large scale in the region is governed by the Asian monsoon circulation and hence the seasons are  
193 also classified based on such large scale circulations and precipitation: Pre-Monsoon (March-  
194 May), Monsoon (June-September), Post-Monsoon (October-November) and Winter (December-  
195 February). Sharma et al. (2012) used the same classification of seasons while explaining the

196 seasonal variation of BC concentrations observed in the Kathmandu Valley. Locally in the  
197 valley, the mountain-valley wind circulations play an important role in influencing air quality.  
198 The wind speed at the valley floor is calm ( $\leq 1 \text{ m s}^{-1}$ ) in the morning and night, while a westerly  
199 wind develops after 11:00 AM in the morning till dusk, and switches to a mild easterly at night  
200 (Panday and Prinn, 2009; Regmi et al., 2003). This is highly conducive to building up of air  
201 pollution in the valley, which gets worse during the dry season.

## 202 **2.2 Study sites**

203 Two sites, a semi-urban site within the Kathmandu Valley and a rural site outside the Kathmandu  
204 Valley, were selected for this study. The details of the measurements carried out in these sites is  
205 described Table 1 and in section 2.2.1 and 2.2.2.

### 206 **2.2.1 Bode (SusKat-ABC supersite)**

207 The SusKat-ABC supersite was set up at Bode, a semi-urban location (Figure 1) of the  
208 Madhyapur Thimi municipality in the Bhaktapur district in the eastern side of the Kathmandu  
209 Valley. The site is located at  $27.68^{\circ}\text{N}$  latitude,  $85.38^{\circ}\text{E}$  longitude, and 1344 masl. The local area  
210 around the site has a number of scattered houses and agricultural fields. The agriculture fields are  
211 used for growing rice paddies in the monsoon season. It also receives outflow of polluted air  
212 from three major cities in the valley: Kathmandu Metropolitan City and Lalitpur Sub-  
213 metropolitan City, both mainly during daytime, and Bhaktapur Sub-metropolitan City mainly  
214 during nighttime. Among other local sources around the site, about 10 brick kilns are located in  
215 the east and southeast direction, approximately within 1-4 km from the site which are operational  
216 only during dry season (January to April). There are close to 20 small and medium industries  
217 (pharmaceuticals, plastics, electronics, tin, wood, aluminum, iron, and fabrics etc.) scattered in  
218 the same direction. The Tribhuvan International Airport (TIA) is located approximately 4 km  
219 away to the west of the Bode site.

### 220 **2.2.2 Chanban**

221 Chanban is a rural/background site in Makwanpur district outside of the Kathmandu Valley  
222 (Figure 1). This site is located ~25 km aerial distance due southwest from Bode. The site is

223 located on a small ridge (27.65<sup>0</sup>N, 85.14<sup>0</sup>E, 1896 masl) between two villages - Chitlang and  
224 Bajrabarahi - within the forested watershed area of Kulekhani Reservoir, which is located ~ 4.5  
225 km southwest of the site. The instruments were set up on the roof of 1-storey building in an open  
226 space inside the Nepali Army barrack. There was a kitchen of the army barrack at about 100 m to  
227 the southeast of the measurement site. The kitchen uses LPG, electricity, kerosene, and firewood  
228 for cooking activities.

### 229 **2.3 Instrumentation**

230 The measurements were carried out in two phases in 2013-2014 and 2015. In phase one, a cavity  
231 ring down spectrometer (Picarro G2401, USA) was deployed in Bode to measure ambient CO<sub>2</sub>,  
232 CH<sub>4</sub>, CO, and water vapor mixing ratios. Twelve months (6 March 2013 - 5 March 2014) of  
233 continuous measurements were made in Bode. The operational details of the instruments  
234 deployed in Bode are also provided in Table 1. In phase two, simultaneous measurements were  
235 made in Bode and Chanban for a little less than 3 months (15 July to 03 October 2015).

236 The Picarro G2401 analyzer quantifies spectral features of gas phase molecules by using a novel  
237 wavelength-scanned cavity ring down spectroscopic technique (CRDS). The instrument has a 30  
238 km path length in a compact cavity that results high precision and sensitivity. Because of the  
239 high precision wavelength monitor, it uses absolute spectral position and maintains accurate peak  
240 quantification. Further, it only monitors the special features of interest for reducing the drift. The  
241 instrument also has water correction to report dry gas fraction. The reported measurement  
242 precision for CO<sub>2</sub>, CH<sub>4</sub>, CO and water vapor in dry gas is < 150 ppb, < 30 ppb, < 1ppb and < 200  
243 ppm for 5 seconds with 1 standard deviation (Picarro, 2015).

244 In Bode, the Picarro analyzer was placed on the 4<sup>th</sup> floor of a 5-storey building with an inlet at  
245 0.5 m above the roof of the building with a 360 degree view (total inlet height: 20 m above  
246 ground). The sample air was filtered at the inlet to keep dust and insects out and was drawn into  
247 the instrument through a 9 m Teflon tube (1/4 inches ID). The Picarro analyzer was set to record  
248 data in every 5 second and recorded both directly sampled data and water corrected data of CO<sub>2</sub>  
249 and CH<sub>4</sub>. In this paper, only water-corrected or dry mixing ratios of CH<sub>4</sub> and CO<sub>2</sub> were used to  
250 calculate the hourly averages for diurnal and seasonal analysis.

251 The instruments were factory calibrated before commencing the field measurement. Picarro  
252 G2401 model is designed for remote application and long term deployment with minimal drift  
253 and less requirement for intensive calibration (Crosson, 2008) and thus was chosen for the  
254 current study in places like Kathmandu where there is no or limited availability of high quality  
255 reference gases. Regular calibration of Picarro G2401 in field during 2013-2014 deployment was  
256 not conducted due to challenges associated with the quality of the reference gas, especially for  
257 CO and CH<sub>4</sub>. One time calibration was performed for CO<sub>2</sub> (at 395, and 895 ppmv) in July 2015  
258 before commencing the simultaneous measurement in Bode and Chanban in 2015. The  
259 ~~%difference between CO<sub>2</sub> mixing ratio reported by~~ of the analyzer and the ~~—differed~~  
260 ~~by approximately 5% at~~ reference mixing ratio was within 5%. CO observations from Picarro  
261 G2401 were compared with observations from another CO analyzer (Horiba, model AP370) that  
262 was also operated in Bode for 3 months (March - May 2013). Horiba CO monitor was a new  
263 unit, which was factory calibrated before its first deployment in Bode. Nevertheless, this  
264 instrument was inter-compared with another CO analyzer (same model) from the same  
265 manufacturer prior to the campaign and its correlation coefficient was 0.9 [slope of data from the  
266 new unit (y-axis) vs the old unit (x-axis) = 1.09]. Primary gas cylinders from Linde UK (1150  
267 ppbv) and secondary gases from Ultra-Pure Gases and Chemotron Science Laboratories (1790  
268 ppbv) were used for the calibration of CO instrument. Further details on CO measurements and  
269 calibration of Horiba AP370 can be found in Sarangi et al. (2014; 2016). Statistically significant  
270 correlation ( $r = 0.99$ , slope = 0.96) was found between Picarro and Horiba hourly average CO  
271 mixing ratio data (Supplementary Information Figure S1). Furthermore, the monthly mean  
272 difference between these two instruments (Horiba AP370 minus Picarro G2401) was calculated  
273 to be 0.02 ppm (3%), 0.04 ppm (5%) and 0.02 ppm (4%) in March, April and May, respectively.  
274 For the comparison period of 3 months, the mean difference was 0.02 ppm (4%). Overall  
275 differences were small to negligible during the comparison period and thus, adjustment in the  
276 data was deemed not necessary.

277 Besides highly selective to individual species, Picarro G2401 has a water correction function and  
278 thus accounts for the any likely drift in CO, CO<sub>2</sub> and CH<sub>4</sub> mixing ratios with the fluctuating  
279 water vapor concentration (Chen et al., 2013; Crosson, 2008). Crosson (2008) also estimated a

280 peak to peak drift of 0.25 ppmv. Further, Crosson (2008) observed a 1.2 ppbv/day drift in CO<sub>2</sub>  
281 after 170 days from the initial calibration. For a duration of one year the drift will be less than 1  
282 ppmv, which is less than 1% of the observed mixing ratio in (hourly ranges: 376-537 ppm) Bode  
283 even if the drift was in same magnitude as in case of Crosson (2008). Crosson (2008) reported  
284 0.8 ppbv peak to peak drift in CH<sub>4</sub> measurements for 18 days after the initial calibration.

285 There were other instruments concurrently operated in Bode; a ceilometer for measuring mixing  
286 layer height (Vaisala Ceilometer CL31, Finland), and an Automatic Weather Station (AWS)  
287 (Campbell Scientific, USA). The ceilometer was installed on the rooftop (20 m above ground) of  
288 the building (Mues et al., 2017). For measuring the meteorological parameters, a Campbell  
289 Scientific AWS (USA) was set up on the roof of the building with sensors mounted at 2.9 m  
290 above the surface of the roof (22.9 m from the ground). The Campbell Scientific AWS measured  
291 wind speed and direction, temperature, relative humidity and solar radiation every minute.  
292 Temperature and rainfall data were taken from an AWS operated by the Department of  
293 Hydrology and Meteorology (DHM), Nepal at the Tribhuvan International Airport (TIA, see  
294 Figure 1), ~4 km due west of Bode site.

295 At Chanban, the inlet for Picarro gas analyzer was kept on the rooftop ~3 m above the ground  
296 and the sample air was drawn through a 3 m long Teflon tube (1/4 inches ID). The sample was  
297 filtered at the inlet with a filter (5-6 μm pore size) to prevent aerosol particles from getting into  
298 the analyzer. An automatic weather station (Davis Vantage Pro2, USA) was also set up in an  
299 open area, about 17 m away from the building and with the sensors mounted at 2 m above  
300 ground.

### 301 **3. Results and discussion**

302 The results and discussions are organized as follow: Sub-section 3.1 describes a year round  
303 variation in CH<sub>4</sub>, CO<sub>2</sub>, CO and water vapor at Bode; sub-sections 3.2, 3.3 ~~and 3.4~~ present the  
304 analysis of the observed ~~diurnal~~, monthly ~~and~~ seasonal variations ~~and diurnal variation~~. Sub-  
305 sections ~~3.4 and 3.5, 3.6, 3.7~~ discusses ~~the impact of city pollution at the measurement site at~~  
306 ~~Bode, influence of regional pollution and transport,~~ about the interrelation of CO<sub>2</sub>, CH<sub>4</sub> and CO

307 and potential emission sources in the valley and sub-section 3.68 compares and contrasts CH<sub>4</sub>,  
308 CO<sub>2</sub>, CO at Bode and Chanban.

### 309 3.1 Time series of CH<sub>4</sub>, CO<sub>2</sub>, CO and water vapor mixing ratios

310 Figure 2 shows the time series of hourly mixing ratios of CH<sub>4</sub>, CO<sub>2</sub>, CO, and water vapor at  
311 Bode. Meteorological data from Bode and the Tribhuvan International Airport are also shown in  
312 Figure 2. Data gaps in Figure 2a and 2b were due to maintenance of the measurement station. In  
313 general, the changes observed in CO mixing ratio was higher in terms of % change than the  
314 variations observed in CH<sub>4</sub> and CO<sub>2</sub> mixing ratios during the sampling period. In contrast, CO  
315 mixing ratios decreased and water vapor mixing ratios increased significantly during the rainy  
316 season (June-September). For the entire sampling period, the annual average ( $\pm$  one standard  
317 deviation) of CH<sub>4</sub>, CO<sub>2</sub>, CO, and water vapor mixing ratios were 2.1923 ( $\pm 0.066-0.224$ ) ppm,  
318 419.34 ( $\pm 6.0-23.9$ ) ppm, 0.50 ( $\pm 0.23-0.35$ ) ppm, and 1.731 ( $\pm 0.66-0.71$ )%, respectively. The  
319 relative variabilities for the annual average of CH<sub>4</sub>, CO<sub>2</sub> and CO were thus 3%, 1.4% and 46%,  
320 respectively. Their variabilities at Mauna Loa were CH<sub>4</sub>: 6% and CO<sub>2</sub>: 0.5% and at Waliguan  
321 were CH<sub>4</sub>: 0.48%, CO<sub>2</sub>: 0.9%. The high variability in the annual mean, notably for CO in Bode  
322 could be indicative of the seasonality of emission sources and meteorology. The annual CH<sub>4</sub> and  
323 CO<sub>2</sub> mixing ratios were compared to the historical background site (Mauna Loa Observatory,  
324 Hawaii, USA) and the background site (Waliguan, China) in Asia, which will provide insight on  
325 spatial differences. The selection of neighboring countries' (i.e., Indian and China's) urban and  
326 semi-urban sites, where many emission sources are typical for the region, for comparison  
327 provides information on relative differences (higher/lower), which will help in investigating  
328 possible local emission sources in the valley. As expected, annual mean of CH<sub>4</sub> and CO<sub>2</sub> mixing  
329 ratios in the Kathmandu Valley were higher than the levels observed at background sites in the  
330 region and elsewhere for the same period (Table 4). We performed a significance test at 95%  
331 confidence level (t-test) of the annual mean values between the sites to evaluate whether the  
332 observed difference is statistically significant ( $p < 0.05$ ), which was confirmed for the. We found  
333 the difference in annual mean CH<sub>4</sub> and CO<sub>2</sub> between Bode and Mauna Loa, and between Bode  
334 and Waliguan were statistically significant. CH<sub>4</sub> was nearly 230% higher at Bode than at Mauna  
335 Loa observatory ( $1.831 \pm 0.110$  ppm) (Dlugokencky et al., 20176) and ca. 17% higher than at Mt.



336 Waliguan ( $1.879 \pm 0.009$  ppm) ~~in China~~ for the same observation period (Dlugokencky et al.,  
337 2016). The ~~slightly higher~~~~small difference~~ CH<sub>4</sub> mixing ratios between at Bode and Waliguan ~~in~~  
338 ~~comparison to~~ than at Mauna Loa Observatory ~~could signal~~~~indicates the higher mixing ratio of~~  
339 ~~CH<sub>4</sub> in these two Asian sites.~~ The ~~be~~ due to rice farming as a key source of CH<sub>4</sub> in this part of  
340 Asia. Thus, ~~it~~ it could be associated with ~~such~~ agricultural activities in this region. Similarly, the  
341 annual average CH<sub>4</sub> at Bode during 2013-14 was found comparable to ~~higher than urban/semi-~~  
342 ~~urban sites in India, such as~~ an urban site in Ahmedabad ( $1.880 \pm 0.4$  ppm, i.e., variability:  
343 21.3%) in India for 2002 (Sahu and Lal, 2006) and 14% higher than in Shadnagar ( $1.92 \pm 0.07$   
344 ppm, i.e., variability: 3.6%), a semi-urban site in Telangana state (~70 km north from Hyderabad  
345 city) during 2014 (Sreenivas et al., 2016). Likewise, ~~the difference between annual mean mixing~~  
346 ~~ratios at Bode ( $419.3 \pm 6.0$  ppm, 1.4% variability) vs. Mauna Loa ( $396.8 \pm 2.0$  ppm, 0.5%~~  
347 ~~variability) (NOAA, 2015) and Bode vs. Waliguan ( $397.7 \pm 3.6$  ppm, 0.9% variability)~~  
348 ~~(Dlugokencky et al., 2016a) is statistically significant ( $p < 0.05$ ).~~ ~~the annual average CO<sub>2</sub> mixing~~  
349 ~~ratio at Bode ( $419.4 \pm 23.9$  ppm) during the observation period was 5.7% higher than at Mauna~~  
350 ~~Loa Observatory ( $396.76$  ppm) (Tans and Keeling, 2014) and 5.5% higher than at Mt. Waliguan~~  
351 ~~( $397.7$  ppm). The CO<sub>2</sub> mixing ratio in the Kathmandu Valley was also found to be higher than~~  
352 ~~the levels observed in Shadnagar ( $394 \pm 2.9$  ppm) during 2014, Ahmedabad city ( $413 \pm 13.7$~~   
353 ~~ppm) in India during November 2013 to May 2015, and an urban site at Nanjing ( $406.5 \pm 20$~~   
354 ~~ppm) in China (Huang et al., 2015; Sreenivas et al., 2016; Chandra et al., 2016).~~

355  
356 The high CH<sub>4</sub> and CO<sub>2</sub> mixing ratios at Bode in comparison to Ahmedabad ~~and~~ Shadnagar ~~and~~  
357 ~~Nanjing~~ could be due to more than 115 coal-biomass fired brick kiln, some of them are located  
358 near the site (less than 4 km) and confinement of pollutants within the Valley due to bowl shaped  
359 topography of the Kathmandu Valley. Although Ahmedabad ~~and Nanjing sites are~~ ~~is in~~ a big  
360 ~~cityies~~ cities with high population larger than Kathmandu Valley but the ~~measurement sitey is~~ ~~are~~ far  
361 from the nearby heavy polluting industries and situated in plains, where ventilation of pollutants  
362 would be more efficient as opposed to the Kathmandu Valley. The major polluting sources were  
363 industries, residential cooking and transport sector in Ahmedabad (Chandra et al., 2016).  
364 ~~Anthropogenic emission, synoptic circulation, terrestrial biosphere had important role on CO<sub>2</sub>~~  
365 ~~mixing ratios in Nanjing (Huang et al., 2015).~~ Shadnagar is a small town with a population of

366 0.16 million and major sources were industries (small-medium), biomass burning in residential  
367 cooking (Sreenivas et al., 2016).

368 The monthly average of CO<sub>2</sub> mixing ratios in 2015 in Chanban (Aug: 403.4, Sep: 399.1 ppm)  
369 were slightly higher than the background sites at Mauna Loa Observatory (Aug: 398.89 ppm,  
370 Sep: 397.63 ppm) (NOAA, 2015) and Mt. Waliguan (Aug: 394.55 ppm, Sep: 397.68 ppm)  
371 (Dlugokencky et al., 2016a). For these two months in 2015, CH<sub>4</sub> mixing ratios were also higher  
372 in Bode (Aug: 2.28141 ppmb, Sep: 2.371093 ppmb) and Chanban (Aug: 2.0504974 ppmb,  
373 Sep: 2.102475 ppmb) compared to Mauna Loa Observatory (Aug: 1.83104 ppmb, Sep:  
374 1.846568 ppmb) (Dlugokencky et al., 20176) and Mt. Waliguan (Aug: 1.915499 ppmb,  
375 1.911.21 ppmb) (Dlugokencky et al., 2016). The low differences in CO<sub>2</sub> between Chanban and  
376 background sites mentioned above indicate the less number of and/or less intense CO<sub>2</sub> sources at  
377 Chanban during these months because of the lack of burning activities due to rainfall in the  
378 region. The garbage and agro-residue burning activities were also absent or reduced around Bode  
379 during the monsoon period. However, high CH<sub>4</sub> values in August and September in Bode,  
380 Chanban and Mt. Waliguan in comparison to Mauna Loa Observatory may indicate the influence  
381 of CH<sub>4</sub> emission from paddy fields in the Asian region.

### 382 **3.2 Monthly and Seasonal variations**

383 Figure 3 shows the monthly box plot of hourly CH<sub>4</sub>, CO<sub>2</sub>, CO and water vapor observed for a  
384 year in Bode. Monthly and seasonal averages of CH<sub>4</sub> and CO<sub>2</sub> mixing ratios at Bode are  
385 summarized in Table 2 and 3. CH<sub>4</sub> were lowest during May-July (ranges from 2.093-2.129 ppm)  
386 period and highest during August-September (2.274-2.301 ppm), followed by winter. In addition  
387 to the influence of active local sources, the shallow boundary layer in winter was linked to  
388 elevated concentrations (Panday and Prinn, 2009; Putero et al., 2015, Mues et al., 20176). The  
389 low CH<sub>4</sub> values from May to July may be associated with the absence of brick kiln and frequent  
390 rainfall in these months. Brick kiln were operational during January to April. Rainfall also leads  
391 to suppression of open burning activities in the valley (see Figure 2b). The CH<sub>4</sub> was slightly  
392 higher (statistically significant, p<0.05) in monsoon season (July –September) than pre-monsoon  
393 season (unlike CO<sub>2</sub> which was higher in pre-monsoon), and could be associated with the addition

394 of CH<sub>4</sub> flux from the water-logged rice paddies (Goroshi et al., (2011). There was a visible drop  
395 in CH<sub>4</sub> from September to October but remained consistently over 2.183 ppm from October to  
396 April with little variation between these months. Rice-growing activities are minimal or none in  
397 October and beyond, and thus may be related to the observed dip in CH<sub>4</sub> mixing ratio.

398 Comparison of seasonal average CH<sub>4</sub> mixing ratios at Bode and Shadnagar (a semi-urban site in  
399 India) indicated that CH<sub>4</sub> mixing ratios at Bode were higher in all seasons than at Shadnagar:  
400 pre-monsoon ( $1.89 \pm 0.05$  ppm), monsoon ( $1.85 \pm 0.03$  ppm), post-monsoon ( $2.02 \pm 0.01$  ppm),  
401 and winter ( $1.93 \pm 0.05$  ppm) (Sreenivas et al., 2016). The possible reason for lower CH<sub>4</sub> at  
402 Shadnagar in all season could be associated with geographical location and difference in local  
403 emission sources. The highest CH<sub>4</sub> mixing ratio in Shadnagar was reported in post-monsoon  
404 which was associated with harvesting in the Kharif season (July – October), while the minimum  
405 was in monsoon. Shadnagar is a relatively small city (population: ~0.16 million) compared to  
406 Kathmandu Valley and the major local sources which may have influence on CH<sub>4</sub> emission  
407 include bio-fuel, agro-residue burning and residential cooking.

408 The seasonal variation in CO<sub>2</sub> ~~could be due to (i)generally reflects~~ the seasonality of major  
409 emission sources such as brick kilns ~~and regional emission sources such as vegetation fire and~~  
410 ~~agriculture residue burn~~, (ii) seasonal growth of vegetation (CO<sub>2</sub> sink) (Patra et al., 2011) and  
411 (iii) atmospheric transport associated with regional synoptic atmospheric circulation (monsoon  
412 circulation and westerly disturbance in spring season) which could transport regional emission  
413 sources from vegetation fire and agriculture residue burning (Putero et al., 2015), and a local  
414 mountain-valley circulation effect (Kitada and Regmi, 2003; Panday et al., 2009). The  
415 concentrations of most pollutants in the region are lower during the monsoon period (Sharma et  
416 al., 2012, Marinoni, 2013; Putero et al., 2015) ~~due to limited~~ because frequent and heavy rainfall  
417 ~~suppresses~~ emission sources ~~and partially due to rain washout~~. We saw a drop in the CO<sub>2</sub> mixing  
418 ratio during the rainfall period due to changes in various processes such as enhanced vertical  
419 mixing, uptake of CO<sub>2</sub> by vegetation and soils, and where relevant reduction in combustion  
420 sources. CO<sub>2</sub> can also dissolve into rainfall, forming carbonic acid, which may lead to a small  
421 decrease in the CO<sub>2</sub> mixing ratio as has been observed during heavy intensity rainfall (Mahesh et  
422 al., 2014; Chaudhari et al., 2007). Monsoon is also the growing season with higher CO<sub>2</sub>

423 assimilation by plants than other seasons (Sreenivas et al., 2016). In contrast, winter, pre-  
424 monsoon and post-monsoon season experiences an increase in emission activities in the  
425 Kathmandu Valley (Putero et al., 2015).

426  
427 The CO<sub>2</sub> mixing ratios were in the range of 376 - 537 ppm for the entire observation period.  
428 Differences with CH<sub>4</sub> were observed in September and October where CO<sub>2</sub> was increasing  
429 (mean/median) in contrast to CH<sub>4</sub> which showed the opposite trend. The observed increase in  
430 CO<sub>2</sub> after October may be related to less or no rainfall, which results in the absence of rain-  
431 washout and/or no suppression of active emission sources such as open burning activities.  
432 **However, the reduction in CH<sub>4</sub> after October could be due to reduced CH<sub>4</sub> emissions from paddy**  
433 **fields, which were high in August-September.** CO<sub>2</sub> remains relatively lower during July-August,  
434 but it is over 420 ppm from January to May. Seasonal variation of CO<sub>2</sub> in Bode was similar in  
435 seasonal variation but the values are higher than the values observed in Shadnagar, India  
436 (Sreenivas et al., 2016).

437 The variations in CO were more distinct than CH<sub>4</sub> and CO<sub>2</sub> during the observation period  
438 (Figure 3). The highest CO values were observed from January-April (0.71-0.91 ppm). The  
439 seasonal mean of CO mixing ratios at Bode were: pre-monsoon (0.60 ±0.36 ppm), monsoon  
440 (0.26±0.09 ppm), post-monsoon (0.40±0.15 ppm), and winter (0.76±0.43 ppm). The maximum  
441 CO was observed in winter, unlike CO<sub>2</sub> which was maximum in pre-monsoon. The high CO in  
442 winter was due to the presence of strong local pollution sources (Putero et al., 2015) and shallow  
443 mixing layer heights. The addition of regional forest-fire and agro-residue burning augmented  
444 CO<sub>2</sub> mixing ratios in pre-monsoon. The water vapor mixing ratio showed a seasonal pattern  
445 opposite of CO, with a maximum in monsoon (2.53 %) and minimum in winter (0.95 %), and  
446 intermediate values of 1.56 % in pre-monsoon and 1.55 % in post-monsoon season.

447 There were days in August-September when the CH<sub>4</sub> increases by more than 3 ppm (Figure 2).  
448 Enhancement in CO<sub>2</sub> was also observed during the same time period. **In the absence of tracer**  
449 **model simulations, the directionality of the advected air masses is unclear. Figure 4 showed that**  
450 **during these two months, It is likely that these high enhancements CO<sub>2</sub> mixing ratios were**  
451 **particularly high (> 450 CO<sub>2</sub> and > 2.5 ppm CH<sub>4</sub>) with the air masses coming in from the were**

452 ~~associated with the air mass from~~ Northeast-East (NE-E). ~~which had > 2.5 ppm CH<sub>4</sub> and > 450~~  
453 ~~CO<sub>2</sub> (see Figure 4)~~ CO during the same period was not enhanced and didn't show any particular  
454 directionality compared to CH<sub>4</sub> and CO<sub>2</sub> (~~not shown in~~ Figure 4c). Areas NE-E to Bode are  
455 predominantly irrigated (rice paddies) during August-September, and sources such as brick kilns  
456 were not operational during this time period. Goroshi et al. (2011) reported that June to  
457 September is a growing season for rice paddies in South Asia with high CH<sub>4</sub> emissions during  
458 these months and observed a peak in September in the atmospheric CH<sub>4</sub> column over India.  
459 Model analysis also points to high methane emissions in September which coincides with the  
460 growing period of rice paddies (Goroshi et al., 2011, Prasad et al., 2014). The CH<sub>4</sub> mixing ratios  
461 at Bode in January ( $2.233 \pm 0.219$  ppm) and July ( $2.129 \pm 0.168$  ppm) were slightly higher than  
462 the observation in Darjeeling (Jan:  $1.929 \pm 0.056$  ppm; Jul:  $1.924 \pm 0.065$  ppm), a hill station of  
463 eastern Himalaya (Ganesan et al., 2013). The higher CH<sub>4</sub> values in January and July at Bode  
464 compared to Darjeeling could be because of the influence of local sources, in addition to the  
465 shallow boundary layer in Kathmandu Valley. Trash burning and brick kilns are two major  
466 sources from December until April in the Kathmandu Valley while emission from paddy fields  
467 occurs during July-September in the Kathmandu Valley. In contrast, the measurement site in  
468 Darjeeling was located at higher altitude (2194 masl) and was less influenced by the local  
469 emission. The measurement in Darjeeling reflected a regional contribution. There are limited  
470 local source in Darjeeling such as wood biomass burning, natural gas related emission and  
471 vehicular emission (Ganesan et al., 2013).

472 The period between January and April had generally higher or the highest values of CO<sub>2</sub>, CH<sub>4</sub>  
473 and CO at Bode. The measurement site was impacted mainly by local Westerly-Southwesterly  
474 winds (W-SW) and East-Southeast (E-SE). The W-SW typically has a wind speed in the range  
475  $\sim 1 - 6 \text{ m s}^{-1}$  and was active during late morning to afternoon period ( $\sim 11:00$  to  $17:00$  NST,  
476 supplementary information Figure S2 and S3). Major cities in the valley such as Kathmandu  
477 Metropolitan City and Lalitpur Sub-metropolitan City are W-SW of Bode (Figure 1c). Wind  
478 from E-SE were generally calm ( $\leq 1 \text{ m s}^{-1}$ ) and observed only during night and early morning  
479 hours ( $21:00$  to  $8:00$  NST). The mixing ratio of all three species in air mass from the E-SE was  
480 significantly higher than in the air mass from W-SW (Figure 4). There are 10 biomass co-fired

481 brick kilns and Bhaktapur Industrial Estate located within 1-4 km E-SE from Bode (Sarkar et al.,  
482 2016). The brick kilns were only operational during January-April. Moreover, there were over  
483 100 brick kilns operational in the Kathmandu Valley (Putero et al., 2015) which use low-grade  
484 lignite coal imported from India and biomass fuel to fire bricks in inefficient kilns (Brun, 2013).

485 Fresh emissions from main city center were transported to Bode during daytime by W-SW winds  
486 which mainly include vehicular emission. Compared to monsoon months (June-August), air  
487 mass from W-SW had higher values in all three species (Figure 4) during winter and pre-  
488 monsoon months. This may imply that in addition to vehicular emission, there are other potential  
489 sources which were exclusively active during these dry months. Municipal trash burning is also  
490 common in the Kathmandu Valley, with a reported higher frequency from December to February  
491 (Putero et al., 2015). The frequency in the use of captive power generator sets are highest during  
492 the same period, which is another potential source contributing to air coming from W-SW  
493 direction (World Bank, 2014; Putero et al., 2015).

494 Regional transport of pollutants into the Kathmandu Valley was reported by Putero et al. (2015).  
495 To relate the influence of synoptic circulation with the observed variability in BC and O<sub>3</sub> in the  
496 Kathmandu Valley, 5-day back trajectories (of air masses arriving in the Kathmandu Valley)  
497 were computed by Putero et al., (2015) using the HYSPLIT model. These individual trajectories  
498 which were initialized at 600 hPa, for the study period of one year and were clustered into nine  
499 clusters. Of the identified clusters, the most frequently observed clusters during the study period  
500 were the Regional and Westerly cluster or circulation (22% and 21%). The trajectories in the  
501 regional cluster originate within 10° x 10° around the Kathmandu Valley, whereas the majority of  
502 trajectories in this westerly cluster originated broadly around 20-40° N, ~60° E. Putero et al  
503 (2015) found that ~~the regional and westerly synoptic circulation were favorable for high values~~  
504 ~~of BC and O<sub>3</sub> in the Kathmandu Valley. (originated at longitude about 60°E in 5-days back~~  
505 ~~trajectories) was dominant from March-May 2013.~~ Other sources of CO<sub>2</sub> and CH<sub>4</sub> could be due  
506 to vegetation fires which were also reported in the region surrounding the Kathmandu Valley  
507 during the pre-monsoon months (Putero et al., 2015). Similarly, high pollution events, peaking in  
508 the pre-monsoon, were observed at Nepal Climate Observatory-Pyramid (NCO-P) near Mt.  
509 Everest, which have been associated with vegetation fires in the Himalayan foothills and

510 northern IGP region (Putero et al., 2014). MODIS derived forest counts (Figure 5), which also  
511 indicated high frequency of forest fire and farm fire from February to April and also during post-  
512 monsoon season. It is interesting that the monthly mean CO<sub>2</sub> mixing ratio was maximum in April  
513 (430 ± 27 ppm) which could be linked to the fire events. It is likely that the westerly winds  
514 (>2.5-4.5 m s<sup>-1</sup>) during the daytime (supplementary information Figure S2, S3) bring additional  
515 CO<sub>2</sub> from vegetation fires and agro-residue burning in southern plains of Nepal including the  
516 IGP region (Figure 5). Low values of CO<sub>2</sub> and CH<sub>4</sub> during June-July (Figure 3) was coincident  
517 with the rainy season, and sources such as brick kiln emission, trash burning, captive power  
518 generators, and regional agriculture residue burning and forest fires are weak or absent during  
519 these months.

### 520 3.3 Diurnal Variation

521 Figure 6 shows the average seasonal diurnal patterns of CH<sub>4</sub>, CO<sub>2</sub>, CO, and water vapor mixing  
522 ratios observed at Bode for four seasons. All the three gas species had a distinct diurnal pattern in  
523 all seasons, characterized by maximum values in the morning hours (peaked around 7:00-9:00),  
524 afternoon minima around 15:00-16:00, and a gradual increase through the evening until next  
525 morning. There was no clear evening peak in CH<sub>4</sub> and CO<sub>2</sub> mixing ratios whereas CO shows an  
526 evening peak around 20:00. **The gradual increase of CO<sub>2</sub> and CH<sub>4</sub> in the evening in contrast to  
527 the increase until evening peak traffic hours and later decay of CO may be indicative of a few  
528 factors. As pointed out earlier, after the peak traffic hours, there are no particularly strong  
529 sources of CO, especially in the monsoon and post-monsoon season. It is also likely that some of  
530 the CO is decay due to nighttime katabatic winds which replace polluted air masses with cold  
531 and fresh air from the nearby mountain (Panday and Prinn, 2009). As for the CO<sub>2</sub>, the biosphere  
532 respiration at night in the absence of photosynthesis can add additional CO<sub>2</sub> to the atmosphere  
533 which especially in the very shallow nocturnal boundary layer may explains part of the increase  
534 of the CO<sub>2</sub> mixing ratio.** The well-defined morning and evening peaks observed in CO mixing  
535 ratios are associated with the peaks in traffic and residential activities. The CH<sub>4</sub> and CO<sub>2</sub> showed  
536 pronounced peaks in the morning hours (07:00-09:00) in all seasons with almost the same level  
537 of seasonal average mixing ratios. CO had a prominent morning peak in winter and pre-monsoon  
538 season, but the peak was significantly lower in monsoon and post-monsoon. The CO (~1-1.4

539 ppm) around 08:00-09:00 am in winter and pre-monsoon were nearly 3-4 times higher than in  
540 monsoon and post-monsoon season. It appears that CH<sub>4</sub> and CO<sub>2</sub> mixing ratios were  
541 continuously building up at night until the following morning peak in all seasons. The similar  
542 seasonal variations in CH<sub>4</sub> and CO<sub>2</sub> across all seasons could be due to their long-lived nature, as  
543 compared to CO, whose diurnal variations are strongly controlled by the evolution of the  
544 boundary layer. Kumar et al. (2015) also reported morning and evening peaks and an afternoon  
545 low in CO<sub>2</sub> mixing ratios in industrial, commercial, and residential sites in Chennai in India. The  
546 authors also found high early morning CO<sub>2</sub> mixing ratios at all sites and attributed it to the  
547 temperature inversion and stable atmospheric condition.

548  
549 The daytime low CH<sub>4</sub> and CO<sub>2</sub> mixing ratios were due to (i) elevated mixing layer height in the  
550 afternoon (Figure 7), (ii) development of upslope wind circulation in the valley, and (iii)  
551 development of westerly and southwesterly winds which blows through the valley during the  
552 daytime from around 11 am to 5 pm (supplementary information Figure S2), all of which aid in  
553 dilution and ventilation of the pollutants out of the valley (Regmi et al., 2003; Kitada and Regmi,  
554 2003; Panday and Prinn, 2009). In addition, the daytime CO<sub>2</sub> minimum in the summer monsoon  
555 is also associated with high photosynthetic activities in the valley as well as in the broader  
556 surrounding region. In the nighttime and early morning, the mixing layer height was low (only  
557 around 200-300 m in all seasons) and stable boundary layer for almost 17 hours a day. In the  
558 daytime it grows up to 800-1200 m for a short time (ca. from 11:00 to 6:00) (Mues et al., 20176,  
559 ~~manuscript submitted to ACPD~~). Therefore the emissions from various activities in the evening  
560 after 18:00 (cooking and heating, vehicles, trash burning, and bricks factories in the night and  
561 morning) were trapped within the collapsing and shallow boundary layer, and hence mixing  
562 ratios were high during evening, night and morning hours. Furthermore, plant and soil respiration  
563 also increases CO<sub>2</sub> mixing ratio during the night (Chandra et al., 2016). However, Ganesan et al.  
564 (2013) found a distinct diurnal cycle of CH<sub>4</sub> mixing ratios with twin peaks in the morning (7:00-  
565 9:00), and afternoon (15:00-17:00) and a nighttime low in winter but no significant diurnal cycle  
566 in the summer of 2012 in Darjeeling, a hill station (2194 masl) in the eastern Himalaya. The  
567 authors described that the morning peaks could be due to the radiative heating of the ground in  
568 the morning, which breaks the inversion layer formed during night, and as a result, pollutants are



569 ventilated from the foothills up to the site. The late afternoon peaks match wind direction and  
570 wind speed (upslope winds) that could bring pollution from plains to mountains.

571 The diurnal variation of CO is also presented along with CO<sub>2</sub> and CH<sub>4</sub> in Figure 6c. CO is an  
572 indicator of primary air pollution. Although CO mixing ratio showed distinct diurnal pattern, it  
573 was different from the diurnal patterns of CO<sub>2</sub> and CH<sub>4</sub>. CO diurnal variation showed distinct  
574 morning and evening peaks, afternoon minima, and a nighttime accumulation or decay.  
575 Nighttime accumulation in CO was observed only in winter and pre-monsoon and decay or  
576 decrease in monsoon season and post-monsoon season (Figure 7). The lifetime of CO (weeks to  
577 months) is very long compared to the ventilation timescales for the valley, so the different  
578 diurnal cycles would be due to differences in nighttime emissions. While the biosphere respire  
579 at night **which may cause a notable increase in CO<sub>2</sub> in the shallow boundary layer**, most CO  
580 sources **(transport sector, residential cooking)** except brick kilns remain shut down **or less active**  
581 **late** at night. This also explains why nighttime values of CO drop less in the winter and pre-  
582 monsoon than in other seasons. Furthermore, the prominent morning peaks of CO in pre-  
583 monsoon and winter compared to other seasons results from nighttime accumulation, additional  
584 fresh emissions in the morning and recirculation of the pollutants due to downslope katabatic  
585 winds (Pandey and Prinn, 2009; Panday et al., 2009). Pandey and Prinn (2009) observed  
586 nighttime accumulation and gradual decay during the winter (January 2005). The measurement  
587 site in Pandey and Prinn (2009) was near the urban core of the Kathmandu Valley and had  
588 significant influence from the vehicular sources all over the season including the winter season.  
589 Measurement in Bode lies in close proximity to the brick kilns which operate 24 hours during the  
590 winter and pre-monsoon period. Calm southeasterly winds are observed during the nighttime and  
591 early morning (ca.22:00 – 8:00) in pre-monsoon and winter, which transport emissions from  
592 brick kiln to the site (Sarkar et al., 2016). Thus the gradual decay in CO was not observed in  
593 Bode.

594 The timing of the CO morning peak observed in this study matches with observations by Panday  
595 et al. (2009). They also found CO morning peak at 8:00 in October 2004 and at 9:00 in January  
596 2005. The difference could be linked to the boundary layer stability. As the sun rises later in

597 winter, the boundary layer stays stable for a longer time in winter keeping mixing ratios higher in  
598 morning hours than in other seasons with an earlier sunrise.

599 The morning peaks of CO<sub>2</sub> and CH<sub>4</sub> mixing ratios occurred around 6:00-7:00 local time in the  
600 pre-monsoon, monsoon, and post monsoon season, whereas in winter their peaks are delayed by  
601 1-2 hours in the morning; CH<sub>4</sub> at 8:00 and CO<sub>2</sub> at 9:00. The CO showed that its morning peak  
602 was delayed compared to CO<sub>2</sub> and CH<sub>4</sub> morning peaks by 1-2 hour in pre-monsoon, monsoon  
603 and post-monsoon (at 8:00) and in winter (at 9:00). The occurrence of morning peaks in CO<sub>2</sub> and  
604 CH<sub>4</sub> 1-2 hours earlier than CO is interesting. This could be due to the long lifetimes and  
605 relatively smaller local sources of CH<sub>4</sub> and CO<sub>2</sub>, as CO is mainly influenced by emissions from  
606 vehicles during rush hour, as well as from biomass and trash burning in the morning hours. Also,  
607 CO increases irrespective of change in mixing layer (collapsing or/rising, Figure 7) but CO<sub>2</sub> and  
608 CH<sub>4</sub> start decreasing only after the mixing layer height starts to rise. Recently, Chandra et al.  
609 (2016) also reported that the CO<sub>2</sub> morning peak occurred earlier than CO in observations in  
610 Ahmedabad City India. This was attributed to CO<sub>2</sub> uptake by photosynthetic activities after  
611 sunrise but CO kept increasing due to emissions from the rush hour activities.

612 ~~The H~~highest daytime minimum of CO<sub>2</sub> was observed in the pre-monsoon followed by winter  
613 (Figure 6b). ~~which may indicate the influence of regional emissions that increased the baseline~~  
614 ~~background concentrations as well~~The higher daytime minimum of CO<sub>2</sub> mixing ratios in the pre-  
615 monsoon season than in other seasons, especially winter, is interesting. The local emission  
616 sources are similar in pre-monsoon and winter and the boundary layer is higher (in the afternoon)  
617 during the pre-monsoon (~1200 meters) than in winter (~900 meters) (Mues et al., 2017). ~~occurs~~  
618 ~~from 12:00 to 17:00 LST. The highest minimum CO<sub>2</sub> was found in pre-monsoon (Figure 6b).~~  
619 ~~Although the local emission sources are similar in pre-monsoon and winter~~ Also, the biospheric  
620 activity in the region is reported to be higher in the pre-monsoon (due to high temperature and  
621 solar radiation) than winter (Rodda et al., 2016). Among various possible causes, transport of  
622 CO<sub>2</sub> rich air from outside the Kathmandu Valley has been hypothesized as a main contributing  
623 factor, due to regional vegetation fire combined with westerly mesoscale to synoptic transport ;  
624 ~~the higher minimum daytime CO<sub>2</sub> mixing ratios in pre-monsoon season than other seasons,~~  
625 ~~suggest the influence of regional emissions in the Kathmandu Valley, which has been reported in~~

626 ~~previous study by~~ Putero et al. (2015). In monsoon and post-monsoon seasons, the minimum  
627 CO<sub>2</sub> mixing ratios in the afternoon drops down to 390 ppm, ~~which this wasere~~ close to the values  
628 observed at the regional background sites ~~such as~~ Mauna Loa and Waliguan.

629

### 630 **3.4 Seasonal interrelation of CO<sub>2</sub>, CH<sub>4</sub> and CO**

631 The Pearson's correlation coefficient (r) between CO<sub>2</sub> and CO was strong in winter (0.87),  
632 followed by monsoon (0.64), pre-monsoon (0.52) and post-monsoon (0.32). The higher  
633 coefficient in winter indicates that common or similar sources for CO<sub>2</sub> and CO and moderate  
634 values in pre-monsoon and monsoon indicates the likelihood of different sources. To avoid the  
635 influence of strong diurnal variations observed in the valley, daily averages, instead of hourly,  
636 were used to calculate the correlation coefficients. The correlation coefficients between daily  
637 CH<sub>4</sub> and CO<sub>2</sub> for four seasons are as follows: winter (0.80), post-monsoon (0.74), pre-monsoon  
638 (0.70) and monsoon (0.22). A semi-urban measurement study in India also found a strong  
639 positive correlation between CO<sub>2</sub> and CH<sub>4</sub> in the pre-monsoon (0.80), monsoon (0.61), post-  
640 monsoon (0.72) and winter (0.8) (Sreenivas et al., 2016). It should be noted here that Sreenivas  
641 et al., (2006) used hourly average CO<sub>2</sub> and CH<sub>4</sub> mixing ratios. The weak monsoon correlation at  
642 Bode, which is in contrast to Sreenivas et al. (2016), may point to the influence of dominant CH<sub>4</sub>  
643 emission from paddy field during the monsoon season (Goroshi et al., 2011). Daily CH<sub>4</sub> and CO  
644 was also weakly correlated in monsoon (0.34) and post-monsoon (0.45). Similar to CH<sub>4</sub> and  
645 CO<sub>2</sub>, the correlation between CH<sub>4</sub> and CO were moderate to strong in pre-monsoon (0.76) and  
646 winter (0.75).

647 Overall, the positive and high correlations between CH<sub>4</sub> and CO mixing ratios and between CH<sub>4</sub>  
648 and CO<sub>2</sub> in ~~the~~ pre-monsoon and winter indicate common sources ~~or source regions~~, most likely  
649 combustion related sources such as vehicular emission, brick kilns, agriculture fire etc., ~~or the~~  
650 ~~same source regions (i.e. their transport due to regional atmospheric transport mechanisms).~~  
651 Weak correlation, between CH<sub>4</sub>-CO<sub>2</sub> and between CH<sub>4</sub>-CO, during monsoon season indicates  
652 sources other than combustion-related may be active, such as agriculture as a key CH<sub>4</sub> source  
653 (Goroshi et al., 2013)

### 654 **3.5 Influence of regional emission and transport**

655 ~~Regional sources and transport can influence the level of air pollution in the Kathmandu Valley~~  
656 ~~mainly originating from regions west of the Kathmandu Valley (Putero et al., 2015). Wind from~~  
657 ~~the north, which is less frequent than southerly and westerly winds, often brings cleaner air mass~~  
658 ~~(also low in CH<sub>4</sub>, Figure 4) and hence helps dilute or flush out the valley's polluted air.~~  
659 ~~Household combustion of biofuel, used mainly in the southern plains of Nepal and the IGP~~  
660 ~~region, is an important contributor to the regional pollution in the higher mountainous areas~~  
661 ~~(Panday and Prinn, 2009; Putero et al., 2014). Recently, Putero et al. (2015) attributed the~~  
662 ~~afternoon high BC and O<sub>3</sub> concentrations at Paknajol in the Kathmandu Valley during pre-~~  
663 ~~monsoon season to regional vegetation fire episodes and linked to the regional transport by~~  
664 ~~westerly circulation. Our study also observed a number of episodes with high CO<sub>2</sub>, CH<sub>4</sub> and CO~~  
665 ~~mixing ratios at Bode during most of the days in March, April and May. During the entire~~  
666 ~~sampling period of a year, there were 42 days with CO<sub>2</sub> mixing ratio  $\geq$  430 ppm, of which 29~~  
667 ~~days (or 69%) were during the pre-monsoon (25 days or 59% in March and April alone) and 10~~  
668 ~~days (23%) in winter. However, atmospheric chemistry transport models are required to confirm~~  
669 ~~and differentiate contributions of local sources and regional sources influencing the Kathmandu~~  
670 ~~Valley, which is beyond the scope of this study.~~

671

### 672 **3.6-3.5 CO and CO<sub>2</sub> ratio: Potential emission sources**

673 The ratio of the ambient mixing ratios of CO and CO<sub>2</sub> was used as an indicator to help  
674 discriminate emission sources in the Kathmandu Valley. The ratio was calculated from the  
675 excess (dCO and dCO<sub>2</sub>) relative to the background values of ambient CO and CO<sub>2</sub> mixing ratios.  
676 The excess value was estimated by subtracting the base value which was calculated as the fifth  
677 percentile of the hourly data for a day (Chandra et al., 2016).

678 Average emission ratios from the literature are shown in Table 5, and average ratios of  
679 dCO/dCO<sub>2</sub> are shown in Table 6, disaggregated into morning hours, evening hours, and seasonal  
680 values. ~~It must be stated that due to the large variance in the calculated ratio from this study~~

681 (Table 6) as well as the likely variation in the estimated ratio presented in Table 5, the  
682 interpretation and conclusion about sources should be cautiously drawn and will be indicative.  
683 Higher ratios were found in pre-monsoon (12.4) and winter (15.1) season compared to post-  
684 monsoon (8.3) and monsoon (7.5). These seasonal differences in the  $dCO/dCO_2$  ratio are  
685 depicted in Figure 8, which shows a clear relationship with the wind direction and associated  
686 emissions, with the highest values especially for stronger westerly winds. Compared to the other  
687 three seasons, the ratio in winter was also relatively high for air masses from the east, likely due  
688 to emissions from brick kilns combined with accumulation during more stagnant meteorological  
689 conditions (supplementary information Figure S2, S3). In other seasons, emission emanating  
690 from the north and east of Bode were characterized by a  $dCO/dCO_2$  ratio below 15. Air masses  
691 from the west and south generally have a ratio from 20 to 50 in all but post-monsoon season,  
692 where the ratio sometimes exceeds 50. A ratio of 50 or over is normally due to very inefficient  
693 combustion sources (Westerdahl et al., 2009; Stockwell et al., 2016), such as agro-residue  
694 burning, which is common during the post-monsoon season in the Kathmandu Valley.

695 For interpretability of emission ratio with sources, the ratio was classified into three categories:  
696 (i) 0 – 15, (ii) 15 – 45, and (iii) greater than 45. This classification was based on the observed  
697 distribution of emission ratio during the study period (Figure 8) and a compilation of observed  
698 emission ratios typical for different sources from Nepal and India (see Table 5). An emission  
699 ratio below 15 is likely to indicate residential cooking and diesel vehicles, and captive power  
700 generation with diesel-powered generator sets (Smith et al., 2000; ARAI, 2008; World Bank,  
701 2014). The emission from brick kilns (FCBTK and Clamp kilns, both common in the Kathmandu  
702 Valley), and inefficient, older (built before 2000) gasoline cars fall in between 15 - 45 (Weyant  
703 et al., 2014, Stockwell et al., 2016; ARAI, 2008). Four-stroke motorbikes and biomass burning  
704 activities (mixed garbage, crop-residue and biomass) are one of the least efficient combustion  
705 sources, with emission ratios higher than 45 (Westerdahl et al., 2009; Stockwell et al., 2016;  
706 ARAI, 2008).

707 ~~Based on the classification and Figure 8, the emissions from sources to the north and east of the~~  
708 ~~site are dominated by residential cooking and/or diesel combustion. Emissions from the south~~  
709 ~~and west of Bode are mainly contributed by sources such as brick kilns and inefficient gasoline~~

710 ~~vehicles. Very high ratios, indicative of agro-residue open burning, generally only show up~~  
711 ~~during the post-monsoon period, when such activities take place, especially in areas southwest of~~  
712 ~~the site. The relatively enhanced ratio (20-30) observed in winds from north and east of the site~~  
713 ~~during winter is mostly likely due to brick kilns that use mixed coal-biomass fuel, whereas the~~  
714 ~~Figure 8 indicates the dominant signature of residential cooking, diesel and old gasoline cars~~  
715 ~~during the pre-monsoon, monsoon and post-monsoon seasons. Although ratio of CO/CO<sub>2</sub> is a~~  
716 weak indicator of sources and the mean ratio has large variance (See Table 6), the conclusions  
717 drawn, from using Figure 8 and the above mentioned classification, are not conclusive. The  
718 estimated CO/CO<sub>2</sub> ratio tentatively indicates that the local plume impacting the measurement site  
719 (Bode) from the north and east could be residential and/or diesel combustion. The estimated  
720 CO/CO<sub>2</sub> ratio of the local plume from the south and west generally falls in the 15-45 range  
721 which could indicate emissions from brick kilns and inefficient gasoline vehicles. Very high  
722 ratios were also estimated from the south west during the post-monsoon season. Among other  
723 possible sources, this may indicate agro-residue open burning.

724 The emission inventory for CO identifies (aggregate for a year) residential, and gasoline related  
725 emission from transport sector (Sadavarte et al., 2017, in preparation). The inventory is not yet  
726 temporally resolved, so no conclusion can be drawn about the sources with respect to different  
727 seasons. From the 1km x1km emission inventory of the Kathmandu Valley for 2011, the  
728 estimated sectoral source apportionment of CO is residential (37%), transport sector (40%) and  
729 industrial (20%). The largest fraction from the residential sector is cooking (24 %) whereas the  
730 majority of transport sector related CO in the Kathmandu Valley is from gasoline vehicles.

731 The dCO/dCO<sub>2</sub> ratio also changes markedly between the morning peak hours (7:00-9:00, except  
732 in winter season when the peak occurs during 8:00-9:00) and evening peak hours (19:00-21:00  
733 pm) (Table 6). Morning and evening values were lowest (2.2, 8.0) during the monsoon and  
734 highest (11.2, 21.6) in the winter season, which points to the different emission characteristics in  
735 these two seasons. This feature is similar to Ahmedabad, India, another urban site in south Asia,  
736 where the morning/evening values were lowest (0.9/19.5) in monsoon and highest in winter  
737 (14.3/47.2) (Chandra et al., 2016). In the morning period, the ratio generally falls within a  
738 narrower range, from less than 1 to about 25, which indicates a few dominant sources, such as

739 cooking, diesel vehicles, and diesel gen-sets (see Figure 9). In the evening period, the range of  
740 the ratio is much wider, from less than 1 to more than 100, especially in winter. This is partly due  
741 to the shallower boundary layer in winter, giving local CO emissions a chance to build up more  
742 rapidly compared to the longer-lived and well-mixed CO<sub>2</sub>, and also indicating the prevalence of  
743 additional sources such as brick kilns and agro-residue burning.

### 744 **3.67 Comparison of CH<sub>4</sub> and CO<sub>2</sub> at semi-urban site (Bode) and rural site (Chanban)**

745 Figure 10 shows time series of hourly average mixing ratios of CH<sub>4</sub>, CO<sub>2</sub>, CO and water vapor  
746 observed simultaneously at Bode and Chanban for the period of 15<sup>th</sup> July to 3<sup>rd</sup> October 2015.  
747 The hourly meteorological parameters observed at Chanban are shown in supplementary Figure  
748 S4. The hourly temperature ranges from 14 to 28.5 °C during the observation period. The site  
749 experienced calm winds during the night and moderate southeasterly winds with hourly  
750 maximum speed of up to 7.5 m s<sup>-1</sup> during the observation period. The CH<sub>4</sub> mixing ratios at  
751 Chanban varied from 1.880 ppm to 2.384 ppm, and generally increased from the last week of  
752 July until early September, peaking around 11<sup>th</sup> September and then falling off towards the end  
753 of the month. CO followed a generally similar pattern, with daily average values ranging from  
754 0.10 ppm to 0.28 ppm. The hourly CO<sub>2</sub> mixing ratios ranged from 375 to 453 ppm, with day to  
755 day variations, but there were no clear pattern as observed in trend like CH<sub>4</sub> and CO mixing  
756 ratios.

757 The CH<sub>4</sub>, CO<sub>2</sub>, and CO mixing ratios were higher in Bode than in Chanban (Figure 10, Table 4),  
758 with Chanban approximately representing the baseline of the lower envelope of the Bode levels.  
759 The mean CO<sub>2</sub>, CH<sub>4</sub> and CO mixing ratios over the entire sampling period of nearly three  
760 months at Bode are 3.8%, 12.1%, and 64% higher, respectively, than at Chanban. The difference  
761 in the CO<sub>2</sub> mixing ratio could be due to the large uptake of CO<sub>2</sub> in the forested area at Chanban  
762 and surrounding regions compared to Bode, where the local anthropogenic emissions rate is  
763 higher and less vegetation for photosynthesis. The coincidence between the base values of CO  
764 and CH<sub>4</sub> mixing ratios at Bode and the levels observed at Chanban implies that Chanban CO and  
765 CH<sub>4</sub> mixing ratios are indicative of the regional background levels. A similar increase in CO and  
766 CH<sub>4</sub> mixing ratios at Chanban from July to September was also observed at Bode, which may

767 imply that the regional/background levels in the broader Himalayan foothill region also  
768 influences the baseline of the daily variability of the pollutants in the Kathmandu Valley,  
769 consistent with Panday and Prinn (2009).

770 Figure 11 shows the comparison of average diurnal cycles of CO<sub>2</sub>, CH<sub>4</sub>, CO and water vapor  
771 mixing ratios observed at Bode and Chanban. The diurnal pattern of CO<sub>2</sub> mixing ratios at both  
772 sites is similar, but more pronounced at Bode, with a morning peak around 6:00-7:00, a daytime  
773 minimum, and a gradual increase in the evening until the next morning peak. A prominent  
774 morning peak at Bode during the monsoon season indicates the influence of local emission  
775 sources. The daytime CO<sub>2</sub> mixing ratios are also higher at Bode than at Chanban because of local  
776 emissions less uptake of CO<sub>2</sub> for photosynthesis in the valley in comparison to the forested area  
777 around Chanban. Like the diurnal pattern of CO<sub>2</sub> depends on the evolution of the mixing layer at  
778 Bode, as discussed earlier, it is expected that the mixing layer evolution similarly influences the  
779 diurnal CO<sub>2</sub> mixing ratios at Chanban. CO, on the other hand, shows very different diurnal  
780 patterns at Bode and Chanban. Sharp morning and evening peaks of CO are seen at Bode,  
781 indicating the strong local polluting sources, especially cooking and traffic in the morning and  
782 evening peak hours. Chanban, in contrast, only has a subtle morning peak and no evening peak.  
783 After the morning peak, CO sharply decreases at Bode but not at Chanban. The growth of the  
784 boundary layer after sunrise and entrainment of air from the free troposphere, with lower CO  
785 mixing ratios, causes CO to decrease sharply during the day at Bode. At Chanban, on the other  
786 hand, since the mixing ratios are already more representative of the local and regional  
787 background levels which will also be prevalent in the lower free troposphere, CO does not  
788 decrease notably during the daytime growth of the boundary layer as observed at Bode.

789 Similarly, while there is very little diurnal variation in the CH<sub>4</sub> mixing ratios at Chanban, there is  
790 a strong diurnal cycle of CH<sub>4</sub> at Bode, similar to CO<sub>2</sub> there. At Chanban, the CH<sub>4</sub> mixing ratio  
791 only shows a weak minimum at around 11 am, a slow increase during the day until a its peak  
792 around 22:00, followed by a slow decrease during the night and a more rapid decrease through  
793 the morning. The cause of this diurnal pattern at Chanban is presently unclear, but ~~it is clear that~~  
794 the levels ~~could be are generally~~ representative of the regional background throughout the day  
795 and show only limited influences of local emissions.



#### 796 4. Conclusions

797 A cavity ring down spectrometer (Picarro G2401, USA) was used to measure ambient CO<sub>2</sub>, CH<sub>4</sub>,  
798 CO, and water vapor mixing ratios at a semi-urban site (Bode) in the Kathmandu Valley for a  
799 year. This was the first 12-months of continuous measurements of these four species in the  
800 Kathmandu Valley in the foothills of the central Himalaya. Simultaneous measurement was  
801 carried out at a rural site (Chanban) for approximately 3 months to evaluate urban-rural  
802 differences.

803 The measurement also provided an opportunity to establish diurnal and seasonal variation of  
804 these species in one of the biggest metropolitan cities in the foothills of Himalayas. Annual  
805 average of the mixing ratio of CH<sub>4</sub> and CO<sub>2</sub> in Bode revealed that they were higher than the  
806 ~~concentrations~~ ~~mixing ratios~~ at the background sites such as the Mauna Loa, USA and Mt.  
807 Waliguan, China, as well as higher than urban/semi-urban sites in nearby regions such as  
808 Ahmedabad and Shadnagar in India, ~~and Nanjing in China~~. These comparisons highlight  
809 potential sources of CH<sub>4</sub> and CO<sub>2</sub> in the Kathmandu Valley, such as brick kilns in the valley.

810 Polluted air masses were transported to the site mainly by two major local wind circulation  
811 patterns, East-South/North East and West-Southwest throughout the observation period. Strong  
812 seasonality was observed with CO compared to CO<sub>2</sub> and CH<sub>4</sub>. Winter and pre-monsoon high CO  
813 are linked to emission sources active in these seasons only and are from east-southeast and west-  
814 southwest. Emission from the east-southeast are most likely related to brick kilns (winter and  
815 pre-monsoon), which are in close proximity to Bode. Major city-centers are located in the west-  
816 southwest of Bode (vehicular emission) which impact the site all-round the year, although higher  
817 during winter season. Winter high was also observed with CO<sub>2</sub> and CH<sub>4</sub>, which are mostly local  
818 influence of brick kilns, trash burning and emission from city-center. Nighttime and early  
819 morning accumulation of pollutants in winter due to a shallow stable mixing height (*ca.* 200 m)  
820 also contribute to elevated levels than other seasons. ~~Regional transport into the Kathmandu~~  
821 ~~Valley could be related to CO<sub>2</sub> peak during pre-monsoon. The highest CH<sub>4</sub> during the post-~~  
822 ~~monsoon could be associated with agricultural activity northeast of Bode.~~ Diurnal variation  
823 across all seasons indicates the influence of rush-hour emissions related to vehicles and

824 residential emissions. The evolution of the mixing layer height (200-1200 m) was a major factor  
825 which controls the morning-evening peak, afternoon low and night-early morning accumulation  
826 or decay. Thus the geographical setting of the Kathmandu Valley and its associated meteorology  
827 play a key role in the dispersion and ventilation of pollutants in the Kathmandu Valley. The ratio  
828 of CO/CO<sub>2</sub> across different season and wind direction showed that emissions from inefficient  
829 gasoline vehicles, brick kilns, residential cooking and diesel combustion are likely to impact  
830 Bode.

831 The differences in mean values for urban-rural measurements at Bode and Chanban is highest for  
832 CO (64 %) compared to CO<sub>2</sub> (3.8%) and CH<sub>4</sub> (12%). Low values of CH<sub>4</sub> and CO<sub>2</sub> mixing ratios  
833 at the Chanban site **could** represent ~~a~~ regional background mixing ratios.

834 This study **has** provided valuable information on key greenhouse gases and air pollutants in the  
835 Kathmandu Valley and the surrounding regions. **These observations can be** useful **as ground-**  
836 **truthing** for evaluation of satellite measurements, **as well as** climate and regional air quality  
837 models. The **overall** analysis presented in the paper **will contribute along with other recent**  
838 **measurement and analysis to ~~ean~~ providing e** a sound scientific basis for reducing emissions of  
839 greenhouse gases and air pollutants in the Kathmandu Valley.

#### 840 **Acknowledgements**

841 The IASS is grateful for its funding from the German Federal Ministry for Education and  
842 Research (BMBF) and the Brandenburg Ministry for Science, Research and Culture (MWFK).  
843 This study was partially supported by core funds of ICIMOD contributed by the governments of  
844 Afghanistan, Australia, Austria, Bangladesh, Bhutan, China, India, Myanmar, Nepal, Norway,  
845 Pakistan, Switzerland, and the United Kingdom as well as funds provided to ICIMOD's  
846 Atmosphere Initiative by the Governments of Sweden and Norway. We are thankful to  
847 Bhogendra Kathayat, Shyam Newar, Dipesh Rupakheti, **Piyush Bhardwaj**, Ravi Pokharel, and  
848 Pratik Singdan for their assistance during the measurement, P.S. Praveen for his support in  
849 calibration of Picarro instrument, Pankaj Sadavarte for his help in refining Figure 1, and Liza  
850 Manandhar and Rishi KC for the logistical support. The authors also express their appreciation to  
851 the Department of Hydrology and Meteorology (DHM), Nepal, and the Nepal Army.

852 **References**

853

854 Aryal, R. K., Lee, B.-K., Karki, R., Gurung, A., Baral, B., and Byeon, S.-H.: Dynamics of PM  
855 2.5 concentrations in Kathmandu Valley, Nepal, *Journal of Hazardous Materials*, 168, 732-  
856 738, 2009.

857

858 Automotive Research Association of India (ARAI): Emission factor development for Indian  
859 vehicles ([http://www.cpcb.nic.in/Emission\\_Factors\\_Vehicles.pdf](http://www.cpcb.nic.in/Emission_Factors_Vehicles.pdf)), 2008.

860

861 Brun, V. (Eds. 1): Fried earth bricks, kilns and workers in Kathmandu Valley. Himal Books,  
862 Lazimpat-Kathmandu, Nepal, 2013.

863

864 *Central Bureau of Statistics (CBS): Nepal Living Standards Survey 2010/11, Statistical Report*  
865 *Volume 1, Central Bureau of Statistics, Government of Nepal, 2011.*

866

867 Chandra, N., Lal, S., Venkataramani, S., Patra, P. K., and Sheel, V.: Temporal variations of  
868 atmospheric CO<sub>2</sub> and CO at Ahmedabad in western India, *Atmospheric Chemistry and*  
869 *Physics*, 16, 6153-6173, 2016.

870

871 Chen, H., Karion, A., Rella, C., Winderlich, J., Gerbig, C., Filges, A., Newberger, T., Sweeney,  
872 C., and Tans, P.: Accurate measurements of carbon monoxide in humid air using the cavity ring-  
873 down spectroscopy (CRDS) technique, *Atmospheric Measurement Techniques*, 6, 1031-1040,  
874 2013.

875

876 Chen, P., Kang, S., Li, C., Rupakheti, M., Yan, F., Li, Q., Ji, Z., Zhang, Q., Luo, W., and  
877 Sillanpää, M.: Characteristics and sources of polycyclic aromatic hydrocarbons in atmospheric  
878 aerosols in the Kathmandu Valley, Nepal, *Science of the Total Environment*, 538, 86-92, 2015.

879

880 Chen, Y. H., and Prinn, R. G.: Estimation of atmospheric methane emissions between 1996 and  
881 2001 using a three-dimensional global chemical transport model, *J. Geophys. Res.*  
882 *Atmospheres*, 111, 2006.

883

884 Conrad, R.: Soil microorganisms as controllers of atmospheric trace gases (H<sub>2</sub>, CO, CH<sub>4</sub>, OCS,  
885 N<sub>2</sub>O, and NO), *Microbiological Reviews*, 60, 609-640, 1996.

886 Crosson, E.: A cavity ring-down analyzer for measuring atmospheric levels of methane, carbon  
887 dioxide, and water vapor, *Applied Physics B: Lasers and Optics*, 92, 403-408, 2008.

888

889 Department of Transport Management (DoTM):. Annual report of Ministry of Labor and  
890 transport management, Nepal Government, 2015.

891

892 Dlugokencky, E.J., A.M. Croswell, P.M. Lang, J.W. Mund, Atmospheric Methane Dry Air Mole  
893 Fractions from quasi-continuous measurements at Mauna Loa, Hawaii, 1986-2016, Version:  
894 2017-01-20, path ([ftp://aftp.cmdl.noaa.gov/data/trace\\_gases/ch4/in-situ/surface/](ftp://aftp.cmdl.noaa.gov/data/trace_gases/ch4/in-situ/surface/)), 2017.

895

896 Dlugokencky, E.J., Lang, P.M., Croswell, A. M., Mund, J. W., Croswell, M. J., and Thoning, K.  
897 W.: Atmospheric Methane Dry Air Mole Fractions from the NOAA ESRL Carbon Cycle  
898 Cooperative Global Air Sampling Network, 1983-2015, Version: 2016-07-07, Path:  
899 [ftp://aftp.cmdl.noaa.gov/data/trace\\_gases/ch4/flask/surface/](ftp://aftp.cmdl.noaa.gov/data/trace_gases/ch4/flask/surface/), 2016.

900

901 Dlugokencky, E.J., Lang, P.M., Mund, J.W., Croswell, A. M., Croswell, M. J., and Thoning, K.  
902 W.: Atmospheric Carbon Dioxide Dry Air Mole Fractions from the NOAA ESRL Carbon Cycle  
903 Cooperative Global Air Sampling Network, 1968-2015, Version: 2016-08-30, Path:  
904 [ftp://aftp.cmdl.noaa.gov/data/trace\\_gases/co2/flask/surface/](ftp://aftp.cmdl.noaa.gov/data/trace_gases/co2/flask/surface/), 2016a.

905

906 Fowler, A., and Hennessy, K.: Potential impacts of global warming on the frequency and  
907 magnitude of heavy precipitation, *Natural Hazards*, 11, 283-303, 1995.

908

909 Fragkias, M., Lobo, J., Strumsky, D., and Seto, K. C.: Does size matter? Scaling of CO<sub>2</sub>  
910 emissions and US urban areas, *PLoS One*, 8, e64727, 2013.

911

912 Ganesan, A., Chatterjee, A., Prinn, R., Harth, C., Salameh, P., Manning, A., Hall, B., Mühle, J.,  
913 Meredith, L., and Weiss, R.: The variability of methane, nitrous oxide and sulfur hexafluoride in  
914 Northeast India, *Atmospheric Chemistry and Physics*, 13, 10633-10644, 2013.

915

916 Goroshi, S. K., Singh, R., Panigrahy, S., and Parihar, J.: Analysis of seasonal variability of  
917 vegetation and methane concentration over India using SPOT-VEGETATION and ENVISAT-  
918 SCIAMACHY data, *Journal of the Indian Society of Remote Sensing*, 39, 315-321, 2011.

919

920 ~~Huang, X., Wang, T., Talbot, R., Xie, M., Mao, H., Li, S., Zhuang, B., Yang, X., Fu, C., and~~  
921 ~~Zhu, J.: Temporal characteristics of atmospheric CO<sub>2</sub> in urban Nanjing, China, *Atmospheric*  
922 ~~Research~~, 153, 437-450, 2015.~~

923

924 International Centre for Integrated Mountain Development (ICIMOD): Himalayas – Water for  
925 1.3 Billion People. *ICIMOD, Lalitpur-ICIMOD*, 2009.

926 *Intergovernmental Panel for Climate Change (IPCC)*: Climate Change 2013: The Physical  
927 Science Basis. Contribution of Working Group I to the Fifth Assessment Report of the  
928 Intergovernmental Panel on Climate Change, Cambridge University Press, Cambridge, United  
929 Kingdom and New York, NY, USA, 1535 pp., 2013.

930

931 Kim, B. M., Park, J.-S., Kim, S.-W., Kim, H., Jeon, H., Cho, C., Kim, J.-H., Hong, S.,  
932 Rupakheti, M., and Panday, A. K.: Source apportionment of PM<sub>10</sub> mass and particulate carbon  
933 in the Kathmandu Valley, Nepal, *Atmospheric Environment*, 123, 190-199, 2015.

934

935 Kitada, T., and Regmi, R. P.: Dynamics of air pollution transport in late wintertime over  
936 Kathmandu Valley, Nepal: As revealed with numerical simulation, *Journal of Applied*  
937 *Meteorology*, 42, 1770-1798, 2003.

938 Kumar, M. K., and Nagendra, S. S.: Characteristics of ground level CO<sub>2</sub> concentrations over  
939 contrasting land uses in a tropical urban environment, *Atmospheric Environment*, 115, 286-294,  
940 2015.

941

942 Marinoni, A., Cristofanelli, P., Laj, P., Duchi, R., Putero, D., Calzolari, F., Landi, T.,  
943 Vuillermoz, E., Maione, M., and Bonasoni, P.: High black carbon and ozone concentrations  
944 during pollution transport in the Himalayas: Five years of continuous observations at NCO-P  
945 global GAW station, *Journal of Environmental Sciences*, 25, 1618-1625, 2013.

946

947 Ministry of Environment (MoE): Status of climate change in Nepal, Kathmandu Nepal.  
948 Kathmandu, Ministry of Environment, 2011.

949 Ministry of Environment and Forest (MoEF): Indian Network for Climate Change Assessment:  
950 India: Greenhouse Gas Emissions 2007, Tech. rep., 2007.

951 Mues, A., Rupakheti, M., Munkel, C., Lauer, A., Bozem, H., Hoor, P., Butler, T., and Lawrence,  
952 M.: Investigation of the mixing layer height derived from ceilometer measurements in the  
953 Kathmandu Valley and implications for local air quality. *Atmos. Chem. Phys.*, doi:10.5194/acp-  
954 2016-1002, in press, 2017.

955

956 Nepal Electricity Authority (NEA): *A year in review - fiscal year - 2013/2014*  
957 ([http://www.nea.org.np/images/supportive\\_docs/Annual%20Report-2014.pdf](http://www.nea.org.np/images/supportive_docs/Annual%20Report-2014.pdf)), 2014.

958 *NOAA ESRL Global Monitoring Division. updated annually.: Atmospheric Carbon Dioxide Dry*  
959 *Air Mole Fractions from quasi-continuous measurements at Mauna Loa, Hawaii. Compiled by*  
960 *K.W. Thoning, D.R. Kitzis, and A. Crotwell. National Oceanic and Atmospheric Administration*  
961 *(NOAA), Earth System Research Laboratory (ESRL), Global Monitoring Division (GMD):*  
962 *Boulder, Colorado, USA. Version 2016-8 at <http://dx.doi.org/10.7289/V54X55RG>, 2015.*

963

964 Panday, A. K., and Prinn, R. G.: Diurnal cycle of air pollution in the Kathmandu Valley, Nepal:  
965 Observations, *Journal of Geophysical Research: Atmospheres*, 114, 2009.

966 Panday, A. K., Prinn, R. G., and Schär, C.: Diurnal cycle of air pollution in the Kathmandu  
967 Valley, Nepal: 2. Modeling results, *Journal of Geophysical Research: Atmospheres*, 114, 2009.

968 Patra, P., Niwa, Y., Schuck, T., Brenninkmeijer, C., Machida, T., Matsueda, H., and Sawa, Y.:  
969 Carbon balance of South Asia constrained by passenger aircraft CO<sub>2</sub> measurements,  
970 *Atmospheric Chemistry and Physics*, 11, 4163-4175, 2011.

971

972 Pandey, A., Sadavarte, P., Rao, A. B., Venkataraman C.: Trends in multipollutant emissions  
973 from a technology-linked inventory for India: II. Residential, agricultural and informal industry  
974 sectors, *Atmos. Environ.*, 99, 341-352, doi: 10.1016/j.atmosenv.2014.09.080, 2014.

975 Patra, P., Canadell, J., Houghton, R., Piao, S., Oh, N.-H., Ciais, P., Manjunath, K., Chhabra, A.,  
976 Wang, T., and Bhattacharya, T.: The carbon budget of South Asia, 2013.

977

978 Patra, P., Niwa, Y., Schuck, T., Brenninkmeijer, C., Machida, T., Matsueda, H., and Sawa, Y.:  
979 Carbon balance of South Asia constrained by passenger aircraft CO<sub>2</sub> measurements, *Atmos.*  
980 *Chem. Phys.*, 11, 4163-4175, 2011.

981

982 Picarro.: Picarro G2401 CO<sub>2</sub>, CH<sub>4</sub>, CO, Water vapor CRDS analyzer  
983 ([http://hpst.cz/sites/default/files/attachments/datasheet-g2401-crds-analyzer-co2-co-ch4-h2o-air-](http://hpst.cz/sites/default/files/attachments/datasheet-g2401-crds-analyzer-co2-co-ch4-h2o-air-oct15-1.pdf)  
984 [oct15-1.pdf](http://hpst.cz/sites/default/files/attachments/datasheet-g2401-crds-analyzer-co2-co-ch4-h2o-air-oct15-1.pdf)), 2015.

985

986 Prasad, P., Rastogi, S., and Singh, R.: Study of satellite retrieved CO<sub>2</sub> and CH<sub>4</sub> concentration  
987 over India, *Advances in Space Research*, 54, 1933-1940, 2014.

988

989 Pudasainee, D., Sapkota, B., Shrestha, M. L., Kaga, A., Kondo, A., and Inoue, Y.: Ground level  
990 ozone concentrations and its association with NO<sub>x</sub> and meteorological parameters in Kathmandu  
991 valley, Nepal, *Atmos. Environment*, 40, 8081-8087, 2006.

992

993 Putero, D., Landi, T., Cristofanelli, P., Marinoni, A., Laj, P., Duchi, R., Calzolari, F., Verza, G.,  
994 and Bonasoni, P.: Influence of open vegetation fires on black carbon and ozone variability in the  
995 southern Himalayas (NCO-P, 5079 m asl), *Environmental Pollution*, 184, 597-604, 2014.  
996  
997 Putero, D., Cristofanelli, P., Marinoni, A., Adhikary, B., Duchi, R., Shrestha, S., Verza, G.,  
998 Landi, T., Calzolari, F., and Busetto, M.: Seasonal variation of ozone and black carbon observed  
999 at Paknajol, an urban site in the Kathmandu Valley, Nepal, *Atmospheric Chemistry and  
1000 Physics*, 15, 13957-13971, 2015.  
1001  
1002 Regmi, R. P., Kitada, T., and Kurata, G.: Numerical simulation of late wintertime local flows in  
1003 Kathmandu valley, Nepal: Implication for air pollution transport, *Journal of Applied  
1004 Meteorology*, 42, 389-403, 2003.  
1005  
1006 Rodda, S.R., Thumaty, K. C., Jha, C. S. and Dadhwal, V. K.: Seasonal Variations of Carbon  
1007 Dioxide, Water Vapor and Energy Fluxes in Tropical Indian Mangroves. *Forests*, 7, 35;  
1008 doi:10.3390/f7020035, 2016.  
1009  
1010 Rupakheti, M., Panday, A. K., Lawrence, M. G., Kim, S. W., Sinha, V., Kang, S. C., Naja, M.,  
1011 Park, J. S., Hoor, P., Holben, B., Sharma, R. K., Mues, A., Mahata, K. S., Bhardwaj, P., Sarkar,  
1012 C., Rupakheti, D., Regmi, R. P., and Gustafsson, Ö.: Air pollution in the Himalayan foothills:  
1013 overview of the SusKat-ABC international air pollution measurement campaign in Nepal,  
1014 *Atmos. Chem. Phys.*, in preparation, 2017.  
1015  
1016 Sahu, L. K., and Lal, S.: Distributions of C<sub>2</sub>–C<sub>5</sub> NMHCs and related trace gases at a tropical  
1017 urban site in India. *Atmos. Environ.*, 40(5), 880-891, 2006.  
1018  
1019 Sarangi, T., Naja, M., S.Lal, Venkataramani, S., Bhardwaj, P., Ojha, N., Kumar, R., Chandola,  
1020 H. C.: First observations of light non-methane hydrocarbons (C<sub>2</sub>–C<sub>5</sub>) over a high altitude site in  
1021 the central Himalayas, *Atmos. Environ.*, 125, 450–460, 2016.  
1022



1023 Sarangi T., Naja, M., Ojha, N., Kumar, R., Lal, S., Venkataramani, S., Kumar, A., Sagar, R., and  
1024 Chandola, H. C.: First simultaneous measurements of ozone, CO and NO<sub>y</sub> at a high altitude  
1025 regional representative site in the central Himalayas, *J. Geophys. Res.*, 119,  
1026 doi:10.1002/2013JD020631, 2014.

1027

1028 Sarkar, C., Sinha, V., Kumar, V., Rupakheti, M., Panday, A., Mahata, K. S., Rupakheti, D.,  
1029 Kathayat, B., and Lawrence, M. G.: Overview of VOC emissions and chemistry from PTR-TOF-  
1030 MS measurements during the SusKat-ABC campaign: high acetaldehyde, isoprene and isocyanic  
1031 acid in wintertime air of the Kathmandu Valley, *Atmos. Chem. Phys.*, 16, 3979-4003, 2016.

1032

1033 Schneising, O., Buchwitz, M., Burrows, J., Bovensmann, H., Bergamaschi, P., and Peters, W.:  
1034 Three years of greenhouse gas column-averaged dry air mole fractions retrieved from satellite–  
1035 Part 2: Methane, *Atmos. Chem. Phys.*, 9, 443-465, 2009.

1036

1037 Sharma, R., Bhattarai, B., Sapkota, B., Gewali, M., and Kjeldstad, B.: Black carbon aerosols  
1038 variation in Kathmandu valley, Nepal, *Atmospheric Environment*, 63, 282-288, 2012.

1039

1040 Shrestha, R. M., and Rajbhandari, S.: Energy and environmental implications of carbon emission  
1041 reduction targets: Case of Kathmandu Valley, Nepal, *Energy Policy*, 38, 4818-4827, 2010.

1042

1043 Shrestha, S. R., Oanh, N. T. K., Xu, Q., Rupakheti, M., and Lawrence, M. G.: Analysis of the  
1044 vehicle fleet in the Kathmandu Valley for estimation of environment and climate co-benefits of  
1045 technology intrusions, *Atmospheric Environment*, 81, 579-590, 2013.

1046

1047 Sinha, V., Kumar, V., and Sarkar, C.: Chemical composition of pre-monsoon air in the Indo-  
1048 Gangetic Plain measured using a new air quality facility and PTR-MS: high surface ozone and  
1049 strong influence of biomass burning, *Atmos. Chem. Phys.*, 14, 5921-5941, 10.5194/acp-14-5921-  
1050 2014, 2014.

1051

1052 Smith, K. R., Uma, R., Kishore, V., Zhang, J., Joshi, V., and Khalil, M.: Greenhouse  
1053 implications of household stoves: an analysis for India, *Annual Review of Energy and the*  
1054 *Environment*, 25, 741-763, 2000.

1055

1056 Sreenivas, G., Mahesh, P., Subin, J., Kanchana, A. L., Rao, P. V. N., and Dadhwal, V. K.:  
1057 Influence of Meteorology and interrelationship with greenhouse gases (CO<sub>2</sub> and CH<sub>4</sub>) at a  
1058 suburban site of India, *Atmospheric Chemistry and Physics*, 16, 3953-3967, 2016.

1059

1060 Stockwell, C. E., Christian, T. J., Goetz, J. D., Jayarathne, T., Bhave, P. V., Praveen, P. S.,  
1061 Adhikari, S., Maharjan, R., DeCarlo, P. F., and Stone, E. A.: Nepal ambient monitoring and  
1062 source testing experiment (NAMaSTE): emissions of trace gases and light-absorbing carbon  
1063 from wood and dung cooking fires, garbage and crop residue burning, brick kilns, and other  
1064 sources, *Atmospheric Chemistry and Physics*, 16, 11043-11081, 2016.

1065

1066 ~~Tans, P.: NOAA/ESRL ([www.esrl.noaa.gov/gmd/ccgg/trends/](http://www.esrl.noaa.gov/gmd/ccgg/trends/)) and Keeling, R., Scripps~~  
1067 ~~Institution of, Oceanography ([scrippsco2.ucsd.edu/](http://scrippsco2.ucsd.edu/)), 2014.~~

1068 Westerdahl, D., Wang, X., Pan, X., and Zhang, K. M.: Characterization of on-road vehicle  
1069 emission factors and microenvironmental air quality in Beijing, China, *Atmospheric*  
1070 *Environment*, 43, 697-705, 2009.

1071

1072 Weyant, C., Athalye, V., Ragavan, S., Rajarathnam, U., Lalchandani, D., Maithel, S., Baum, E.,  
1073 and Bond, T. C.: Emissions from South Asian brick production, *Environmental Science &*  
1074 *Technology*, 48, 6477-6483, 2014.

1075

1076 World Bank.: Managing Nepal's Urban Transition  
1077 (<http://www.worldbank.org/en/news/feature/2013/04/01/managing-nepals-urban-transition>),  
1078 2013.

1079

1080 World Bank.: Diesel power generation: inventories, black carbon emissions in Kathmandu  
1081 Valley, Nepal. Washington. The World Bank: 1818H Street NW, Washington, DC 20433, USA

1082 WMO.: The state of greenhouse gases in the atmosphere based on global observations through  
1083 2015([http://reliefweb.int/sites/reliefweb.int/files/resources/GHG\\_Bulletin\\_12\\_EN\\_web\\_JN1616](http://reliefweb.int/sites/reliefweb.int/files/resources/GHG_Bulletin_12_EN_web_JN161640.pdf)  
1084 [40.pdf](http://reliefweb.int/sites/reliefweb.int/files/resources/GHG_Bulletin_12_EN_web_JN161640.pdf)), 2016.

1085

1086

**Table 1.** Instruments and sampling at Bode (semi-urban site) and Chanban (rural site)

| Site    | Instrument                                            | Species                                             | sampling interval | Measurement period                                      | inlet/sensor height above ground (m) |
|---------|-------------------------------------------------------|-----------------------------------------------------|-------------------|---------------------------------------------------------|--------------------------------------|
| Bode    | i. Cavity ring down spectrometer (Picarro G2401, USA) | CO <sub>2</sub> , CH <sub>4</sub> , CO, water vapor | 5 sec             | 06 Mar 2013 - 05 Mar 2014<br>14 Jul 2015 - 07 Aug 2015  | 20                                   |
|         | ii. CO monitor (Horriba AP370, USA)                   | CO                                                  | 5 min             | 06 Mar 2013 – 07 June 2013                              | 20                                   |
|         | iii. Ceilometer (Vaisala CL31, Finland)               |                                                     | 15-52 min         | 06 Mar 2013 – 05 Mar 2014                               | 15                                   |
|         | iv. AWS (Campbell Scientific, USA)                    |                                                     | 1 min             |                                                         | 23                                   |
|         | a. CS215                                              | RH, T                                               |                   | 06 Mar 2013 – 24 Apr 2013                               |                                      |
|         | b. CS300 Pyranometer                                  | SR                                                  |                   | 06 Mar 2013 - 05 Mar 2014<br>14 Jul 2015 - 07 Aug 2015  |                                      |
|         | c. RM Young 05103-5                                   | WD, WS                                              |                   | 06 Mar 2013 - 05 Mar 2014<br>14 July 2015 - 07 Aug 2015 |                                      |
|         | v. Airport AWS (Envirodata, Australia)                |                                                     |                   |                                                         |                                      |
|         | a. TA10                                               | T                                                   |                   | 18 Jun 2013 – 13 Jan 2013                               |                                      |
|         | b. RG series                                          | RF                                                  |                   | 06 Mar 2013 – 15 Dec 2013                               |                                      |
| Chanban | i. Cavity ring down spectrometer (Picarro G2401, USA) | CO <sub>2</sub> , CH <sub>4</sub> , CO, water vapor | 5 sec             | 15 July 2015 - 03 Oct 2015                              | 3                                    |
|         | ii AWS (Davis Vantage Pro2, USA)                      | RH, T, SR, WD, WS, RF, P                            | 10 min            | 14 July 2015 - 07 Aug 2015                              | 2                                    |

AWS: Automatic weather station, RH: ambient relative humidity, T: ambient temperature, SR: global solar radiation, WS: wind speed, WD: wind direction, RF: rainfall, P: ambient pressure

**Table 2.** Summary of monthly average CH<sub>4</sub> and CO<sub>2</sub> mixing ratios observed at Bode, a semi-urban site in the Kathmandu Valley during March 2013 to Feb 2014 [mean, standard deviation (SD), median, minimum (Min.), maximum (Max.) and number of data points of hourly average values]

| Month  | CH <sub>4</sub> (ppm) |         |         |       |       | CO <sub>2</sub> (ppm) |       |        |       |       | Data points |
|--------|-----------------------|---------|---------|-------|-------|-----------------------|-------|--------|-------|-------|-------------|
|        | Mean                  | SD      | Median  | Min.  | Max.  | Mean                  | SD    | Median | Min.  | Max.  |             |
| Mar    | 2.207                 | 0.245   | 2.152   | 1.851 | 3.094 | 426.6                 | 26.4  | 418.3  | 378.8 | 510.8 | 596         |
| Apr    | 2.183                 | 0.252   | 2.094   | 1.848 | 3.121 | 430.3                 | 27.4  | 421.0  | 397.0 | 536.9 | 713         |
| May    | 2.093                 | 0.174   | 2.040   | 1.863 | 2.788 | 421.7                 | 22.1  | 413.4  | 395.9 | 511.2 | 725         |
| Jun    | 2.061                 | 0.142   | 2.017   | 1.869 | 2.675 | 417.9                 | 21.3  | 410.4  | 390.5 | 495.7 | 711         |
| Jul    | 2.129                 | 0.168   | 2.074   | 1.893 | 2.770 | 410.3                 | 18.2  | 406.3  | 381.0 | 471.0 | 500         |
| Aug    | 2.274                 | 0.260   | 2.181   | 1.953 | 3.219 | 409.9                 | 22.8  | 405.3  | 376.1 | 493.1 | 737         |
| Sep    | 2.301                 | 0.261   | 2.242   | 1.941 | 3.331 | 414.9                 | 30.2  | 404.0  | 375.9 | 506.2 | 710         |
| Oct    | 2.210                 | 0.195   | 2.156   | 1.927 | 2.762 | 417.0                 | 25.1  | 411.8  | 381.9 | 486.7 | 743         |
| Nov    | 2.207                 | 0.203   | 2.178   | 1.879 | 2.705 | 417.2                 | 20.7  | 415.7  | 385.7 | 478.9 | 717         |
| Dec    | 2.206                 | 0.184   | 2.193   | 1.891 | 2.788 | 417.7                 | 17.3  | 418.0  | 386.7 | 467.6 | 744         |
| Jan    | 2.233                 | 0.219   | 2.198   | 1.889 | 2.744 | 424.8                 | 20.9  | 422.3  | 392.7 | 494.5 | 696         |
| Feb    | 2.199                 | 0.223   | 2.152   | 1.877 | 2.895 | 423.2                 | 22.0  | 417.9  | 392.2 | 484.6 | 658         |
| Annual | 2.1923                | 0.06622 | 2.14034 | 1.848 | 3.331 | 419.3                 | 623.0 | 4134.7 | 375.9 | 536.9 | 8353        |

**Table 3.** Summary of CH<sub>4</sub> and CO<sub>2</sub> mixing ratios at Bode across four seasons during March 2013 to Feb 2014 [seasonal mean, one standard deviation (SD), median, minimum (Min.) and maximum (Max.)]

| Season       | CH <sub>4</sub> (ppm) |       |        |       |       | CO <sub>2</sub> (ppm) |      |        |       |       |
|--------------|-----------------------|-------|--------|-------|-------|-----------------------|------|--------|-------|-------|
|              | Mean                  | SD    | Median | Min.  | Max.  | Mean                  | SD   | Median | Min.  | Max.  |
| Pre-Monsoon  | 2.157                 | 0.230 | 2.082  | 1.848 | 3.121 | 426.2                 | 25.5 | 417.0  | 378.8 | 536.9 |
| Monsoon      | 2.199                 | 0.241 | 2.126  | 1.869 | 3.331 | 413.5                 | 24.2 | 407.1  | 375.9 | 506.2 |
| Post-Monsoon | 2.210                 | 0.200 | 2.167  | 1.879 | 2.762 | 417.3                 | 23.1 | 414.1  | 381.9 | 486.7 |
| Winter       | 2.214                 | 0.209 | 2.177  | 1.877 | 2.895 | 421.9                 | 20.3 | 419.3  | 386.7 | 494.5 |

**Table 4.** Comparison of monthly average CH<sub>4</sub> and CO<sub>2</sub> mixing ratios at a semi-urban and a rural site in Nepal (this study) with other urban and background sites in the region and elsewhere.

| Site Setting                        | Bode, Nepal (Urban) |                 |                  |                  | Chanban, Nepal (Rural) |                  | Mauna Loa, USA (Background) <sup>c</sup> |                 | Waliguan, China (Background) <sup>d</sup> |                 |
|-------------------------------------|---------------------|-----------------|------------------|------------------|------------------------|------------------|------------------------------------------|-----------------|-------------------------------------------|-----------------|
|                                     | CO <sub>2</sub>     | CH <sub>4</sub> | *CO <sub>2</sub> | *CH <sub>4</sub> | *CO <sub>2</sub>       | *CH <sub>4</sub> | CO <sub>2</sub>                          | CH <sub>4</sub> | CO <sub>2</sub>                           | CH <sub>4</sub> |
| Unit                                | ppm                 | ppm             | Ppm              | ppm              | ppm                    | ppm              | Ppm                                      | ppm             | ppm                                       | ppm             |
| Mar 2013                            | 426.6               | 2.207           |                  |                  |                        |                  | 397.3                                    | 1.840           | 399.5                                     | 1.868           |
| Apr                                 | 430.3               | 2.183           |                  |                  |                        |                  | 398.4                                    | 1.837           | 402.8                                     | 1.874           |
| May                                 | 421.7               | 2.093           |                  |                  |                        |                  | 399.8                                    | 1.834           | 402.5                                     | 1.878           |
| Jun                                 | 417.9               | 2.061           |                  |                  |                        |                  | 398.6                                    | 1.818           | 397.4                                     | 1.887           |
| Jul                                 | 410.3               | 2.129           |                  |                  |                        |                  | 397.2                                    | 1.808           | 393.3                                     | 1.888           |
| Aug                                 | 409.9               | 2.274           | 411.3            | 2.281            | 403.4                  | 2.050            | 395.2                                    | 1.819           | 392.0                                     | 1.893           |
| Sep                                 | 414.9               | 2.301           | 419.9            | 2.371            | 399.1                  | 2.102            | 393.5                                    | 1.836           | 393.1                                     | 1.894           |
| Oct                                 | 417.0               | 2.210           |                  |                  |                        |                  | 393.7                                    | 1.836           | 395.6                                     | 1.876           |
| Nov                                 | 417.2               | 2.207           |                  |                  |                        |                  | 395.1                                    | 1.835           | 397.1                                     | 1.875           |
| Dec                                 | 417.7               | 2.206           |                  |                  |                        |                  | 396.8                                    | 1.845           | 398.6                                     | 1.880           |
| Jan 2014                            | 424.8               | 2.234           |                  |                  |                        |                  | 397.8                                    | 1.842           | 398.8                                     | 1.865           |
| Feb                                 | 423.2               | 2.199           |                  |                  |                        |                  | 397.9                                    | 1.834           | 401.1                                     | 1.878           |
| <i>Annual</i>                       |                     |                 |                  |                  |                        |                  |                                          |                 |                                           |                 |
| Bode                                | 419.3               | 2.192           |                  |                  |                        |                  |                                          |                 |                                           |                 |
| Mauna Loa                           |                     |                 |                  |                  |                        |                  | 396.8                                    | 1.832           |                                           |                 |
| Waliguan                            |                     |                 |                  |                  |                        |                  |                                          |                 | 397.7                                     | 1.880           |
| Nanjing (2011) <sup>a</sup>         | 406.5               |                 |                  |                  |                        |                  |                                          |                 |                                           |                 |
| Shadnagar (2014) <sup>a</sup>       | 394.0               |                 |                  |                  |                        |                  |                                          |                 |                                           |                 |
| Ahemadabad (2013-2015) <sup>b</sup> | 413.0               | 1.920           |                  |                  |                        |                  |                                          |                 |                                           |                 |

\*The monthly values for CO<sub>2</sub> and CH<sub>4</sub> in 2015, <sup>a</sup>Huang et al., 2015, <sup>a</sup>Sreenivas et al., 2016, <sup>b</sup>Chandra et al., 2016, <sup>c</sup>Dlugokencky et al., 2017; NOAA, 2015,

<sup>d</sup>Dlugokencky et al., 2016; Dlugokencky et al., 2016a.

[ftp://aftp.cmdl.noaa.gov/data/trace\\_gases/ch4/in\\_situ/surface/mlo/](ftp://aftp.cmdl.noaa.gov/data/trace_gases/ch4/in_situ/surface/mlo/); [ftp://aftp.cmdl.noaa.gov/data/trace\\_gases/co2/in\\_situ/surface/mlo/](ftp://aftp.cmdl.noaa.gov/data/trace_gases/co2/in_situ/surface/mlo/);

<sup>d</sup>[ftp://aftp.cmdl.noaa.gov/data/trace\\_gases/co2/flask/surface/wlg/](ftp://aftp.cmdl.noaa.gov/data/trace_gases/co2/flask/surface/wlg/); [ftp://aftp.cmdl.noaa.gov/data/trace\\_gases/ch4/flask/surface/wlg/](ftp://aftp.cmdl.noaa.gov/data/trace_gases/ch4/flask/surface/wlg/)

**Table 5.** Emission ratio of CO/CO<sub>2</sub> (ppb ppm<sup>-1</sup>) derived from emission factors (gram of gas emitted from per kilogram of fuel burned, except transport sector which is derived from gram of gases emitted per kilometer distance travelled)

| Sectors                     | Details               | CO/CO <sub>2</sub> | Reference               |
|-----------------------------|-----------------------|--------------------|-------------------------|
| 1. Residential/Commercial   |                       |                    |                         |
| i. LPG                      |                       | 4.8                | Smith et al. (2000)     |
| ii. Kerosene                |                       | 13.4               | Smith et al. (2000)     |
| iii. Biomass                |                       | 52.9 - 98.5        | *                       |
| iv. Diesel power generators | < 15 year old         | 5.8                | The World Bank (2014)   |
|                             | >15 year old          | 4.5                |                         |
| 2. Transport                |                       |                    |                         |
| a. Diesel                   |                       |                    |                         |
| i. HCV diesel bus           | >6000cc, 1996-2000    | 4.9                |                         |
|                             | post 2000 and 2005    | 5.4                |                         |
| ii. HCV diesel truck        | >6000cc, post 2000    | 7.9                |                         |
| b. Petrol                   |                       |                    |                         |
| i. 4 stroke motorcycle      | <100 cc, 1996-2000    | 68                 |                         |
|                             | 100-200 cc, Post 2000 | 59.6               |                         |
| ii. Passenger cars          | <1000 cc, 1996-2000   | 42.4               |                         |
| iii. Passenger cars         | <1000 cc, Post 2000   | 10.3               |                         |
| 3. Brick industries         |                       |                    |                         |
| i. BTK fixed kiln           |                       | 17.2               | Weyant et al. (2014)    |
| ii. Clamp brick kiln        |                       | 33.7               | Stockwell et al. (2016) |
| iii. Zigzag brick kiln      |                       | 3.9                | Stockwell et al. (2016) |
| 4. Open burning             |                       |                    |                         |
| i. Mixed garbage            |                       | 46.9               | Stockwell et al. (2016) |
| ii. Crop-residue            |                       | 51.6               | Stockwell et al. (2016) |

\* Westerdahl et al. (2009)

\*\* [http://www.cpcb.nic.in/Emission\\_Factors\\_Vehicles.pdf](http://www.cpcb.nic.in/Emission_Factors_Vehicles.pdf)



**Table 6.** Seasonal average (SD) of the ratio of dCO to dCO<sub>2</sub>, their Geometric mean (GeoSD) over a period of 3 hours during (a) morning peak and (b) evening peak and (c) seasonal (all hours) of the ambient mixing ratios of CO and CO<sub>2</sub>. And their lower and upper bound (LB and UB).

| Period                            | Season       | Mean (SD)   | Median | N    | Geomean (GeoSD) | LB  | UB   |
|-----------------------------------|--------------|-------------|--------|------|-----------------|-----|------|
| a. Morning hours<br>(7:00-9:00)   | Pre-monsoon  | 7.6 (3.1)   | 7.8    | 249  | 11.3 (1.5)      | 5.2 | 24.8 |
|                                   | Monsoon      | 2.2 (1.6)   | 1.9    | 324  | 9.9 (1.9)       | 2.7 | 36.3 |
|                                   | Post-monsoon | 3.1 (1.4)   | 2.8    | 183  | 11.1 (1.5)      | 4.7 | 26.3 |
|                                   | Winter*      | 11.2 (4.4)  | 11     | 255  | 11.4 (1.5)      | 5.3 | 24.2 |
| b. Evening hours<br>(19:00-21:00) | Pre-monsoon  | 15.1 (9.0)  | 12.7   | 248  | 10.5 (1.7)      | 3.5 | 31.6 |
|                                   | Monsoon      | 8.0 (5.2)   | 6.3    | 323  | 10.2 (1.8)      | 3.1 | 33.5 |
|                                   | Post-monsoon | 11.5 (5.6)  | 10.6   | 182  | 11.0 (1.6)      | 4.4 | 27.6 |
|                                   | Winter       | 21.6 (14.1) | 18.2   | 254  | 10.2 (1.8)      | 3.1 | 33.6 |
| c. Seasonal<br>(all hours)        | Pre-monsoon  | 12.2 (13.3) | 8.8    | 1740 | 8.2 (2.4)       | 1.4 | 48.4 |
|                                   | Monsoon      | 7.5 (13.5)  | 2.9    | 2176 | 5.9 (3.3)       | 0.5 | 65.6 |
|                                   | Post-monsoon | 8.3 (12.4)  | 4.4    | 1289 | 6.8 (3.0)       | 0.8 | 59.2 |
|                                   | Winter       | 15.1 (13.3) | 12.5   | 1932 | 9.2 (2.1)       | 2.0 | 41.7 |

\*The morning peak was one hour delayed in winter, thus the 8:00-10:00 period data was used in the analysis.

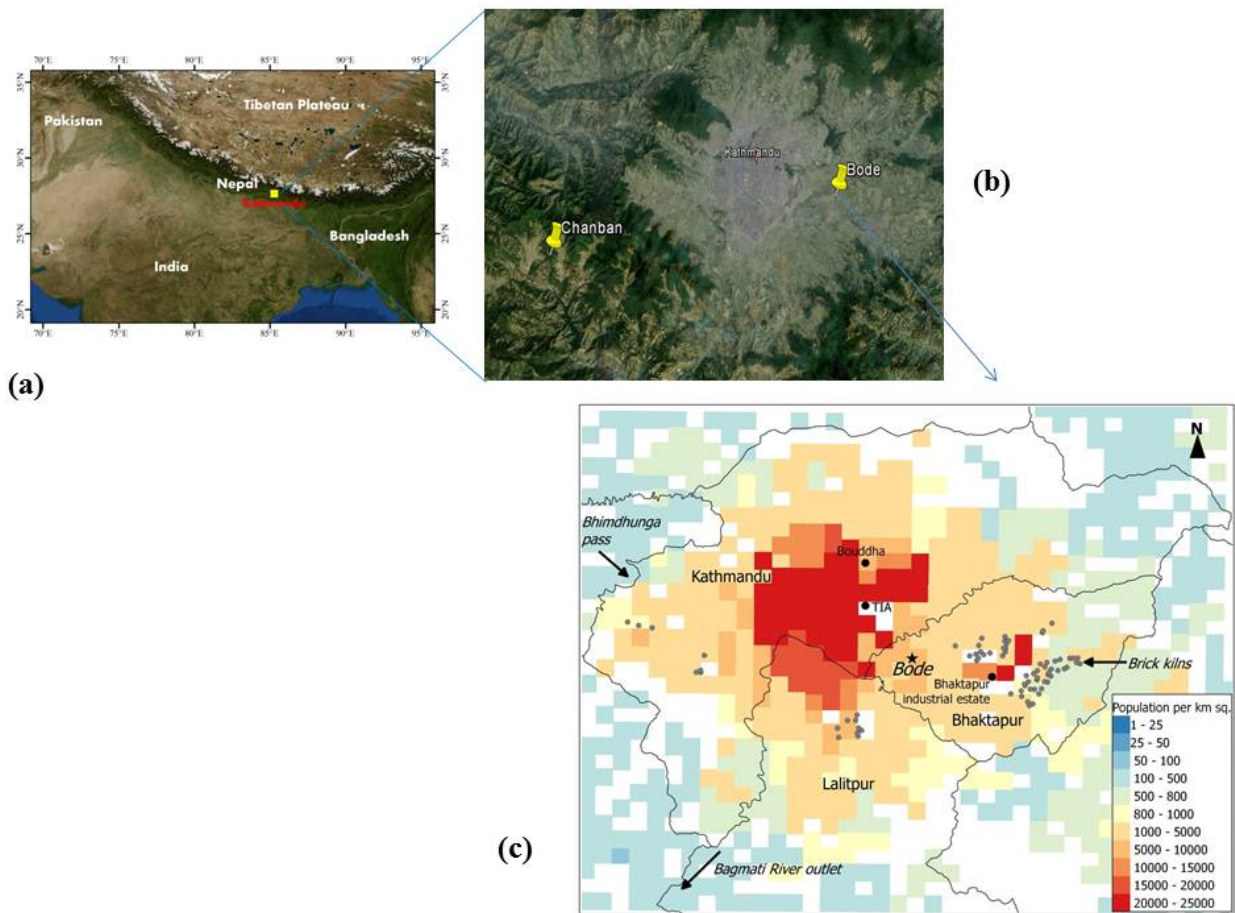

**Figure 1.** Location of measurement sites: (a) Kathmandu Valley (b) semi-urban measurement site at Bode in Kathmandu Valley, and a rural measurement site at Chanban in Makawanpur district Nepal, (c) general setting of Bode site. Colored grid and TIA represent population density and the Tribhuvan International Airport, respectively.

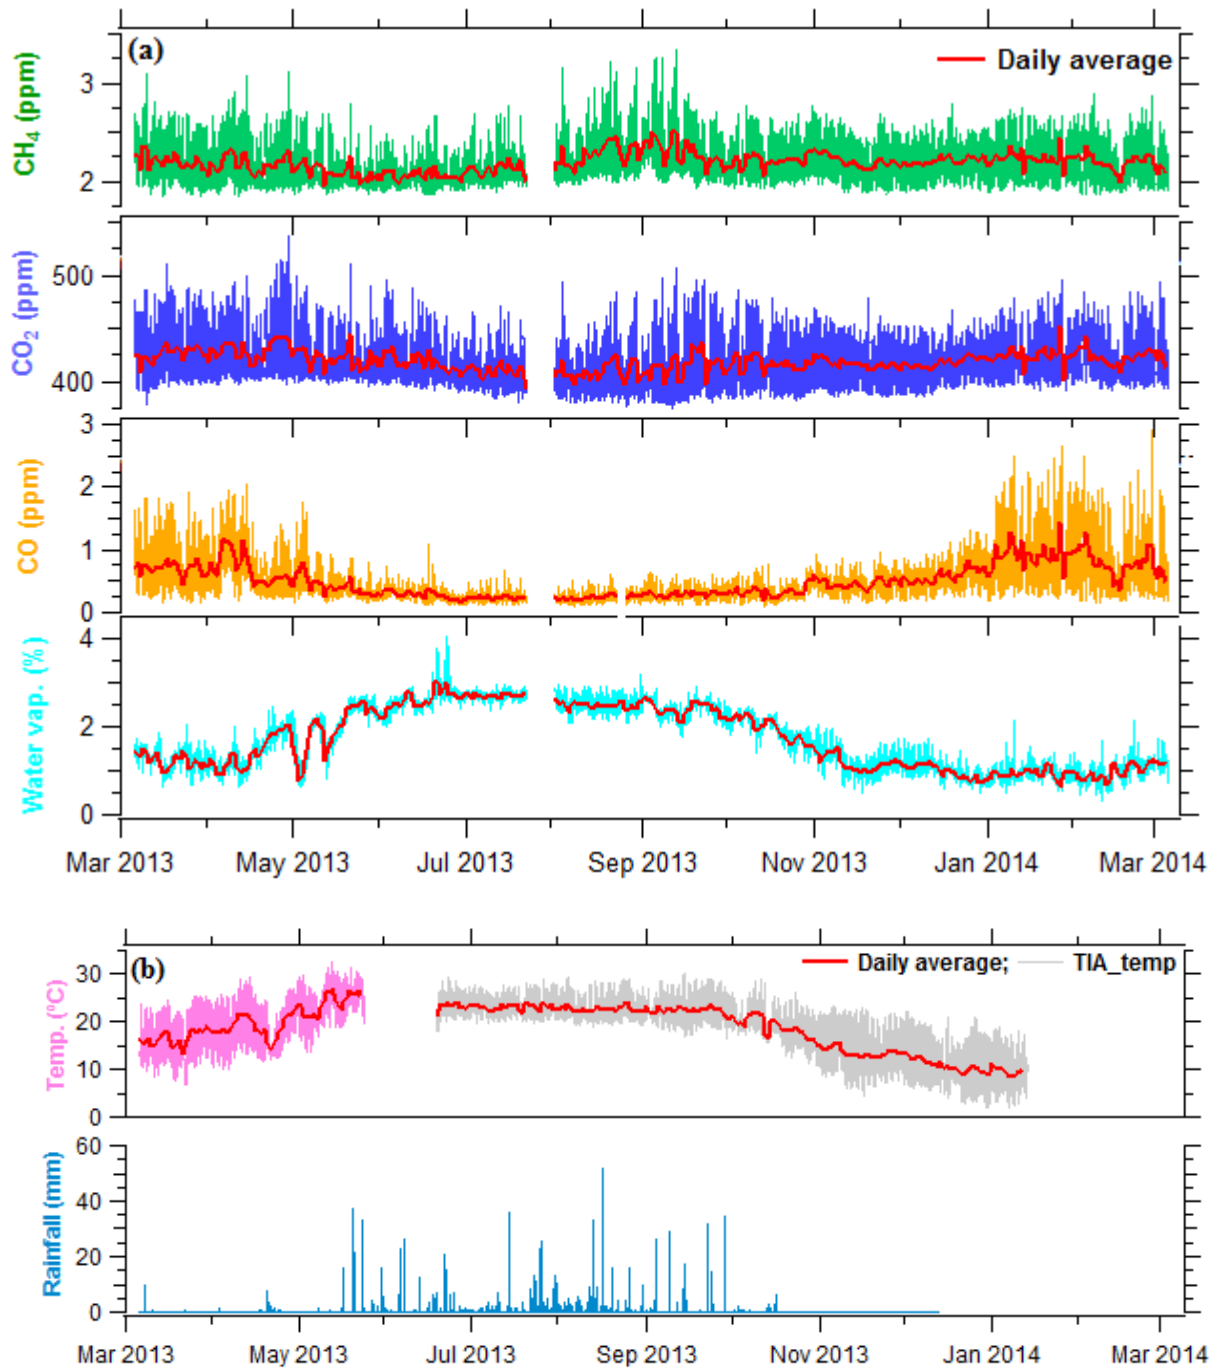

**Figure 2.** Time series of hourly average (a) mixing ratios of CH<sub>4</sub>, CO<sub>2</sub>, CO, and water vapor measured with a cavity ring down spectrometer (Picarro G2401) at Bode, and (b) temperature and rainfall monitored at the Tribhuvan International Airport (TIA), ~4 km to the west of Bode site in the Kathmandu Valley, Nepal. Temperature shown in pink color is observed at Bode site.

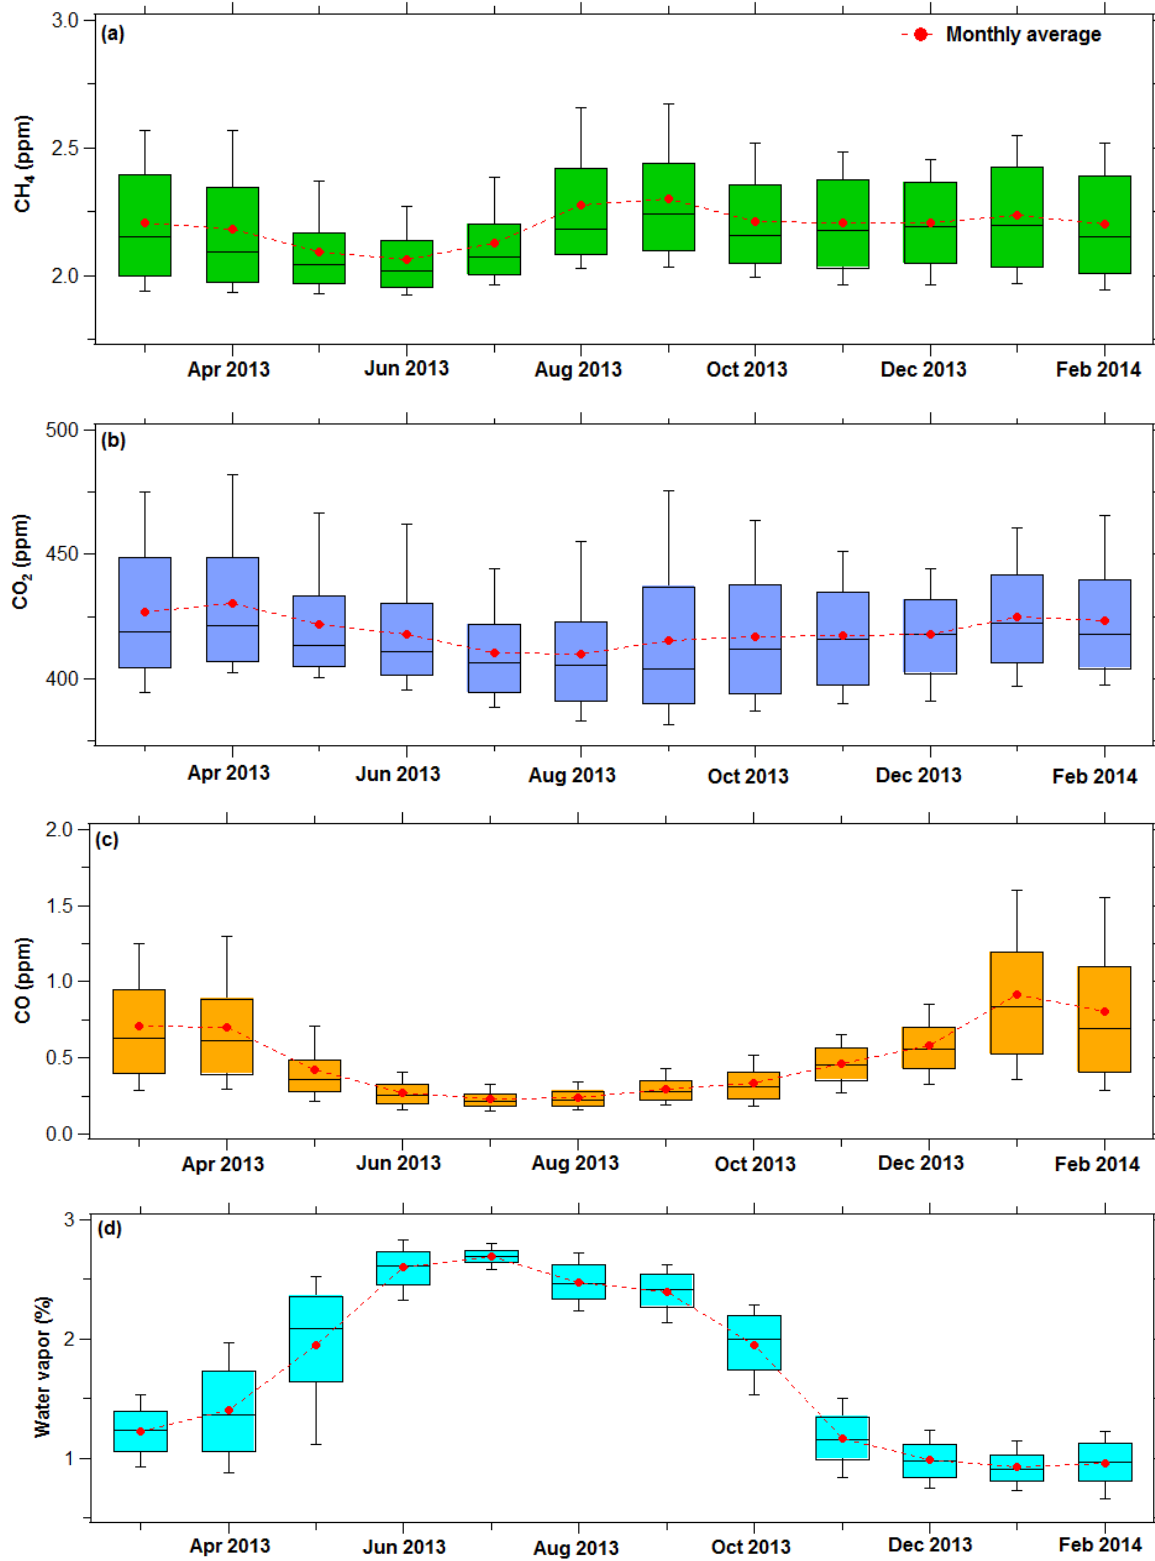

**Figure 3.** Monthly variations of the mixing ratios of hourly (a) CH<sub>4</sub>, (b) CO<sub>2</sub>, (c) CO, and (d) water vapor observed at a semi-urban site (Bode) in the Kathmandu Valley over a period of a year. The lower end and upper end of the whisker represents 10<sup>th</sup> and 90<sup>th</sup> percentile, respectively; the lower end and upper end of each box represents 25<sup>th</sup> and 75<sup>th</sup> percentile, respectively, and black horizontal line in the middle of each box is the median for each month while red dot represents mean for each month.

(a)

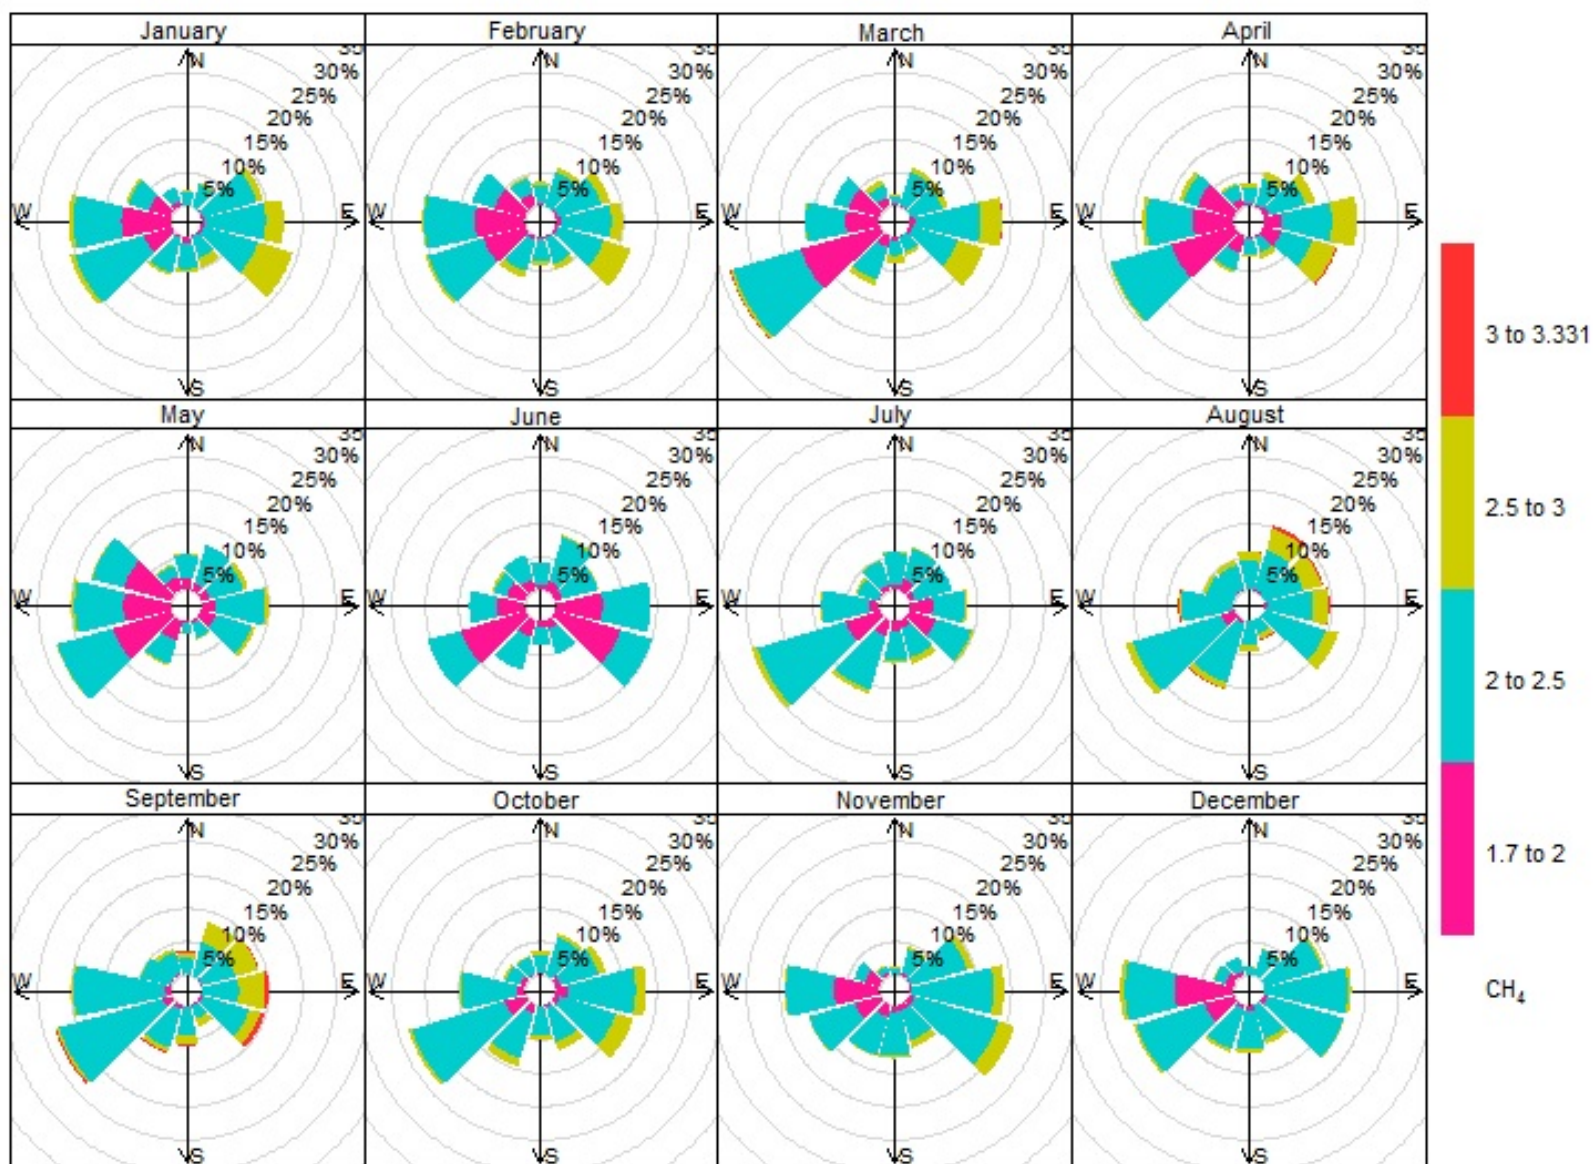

(b)

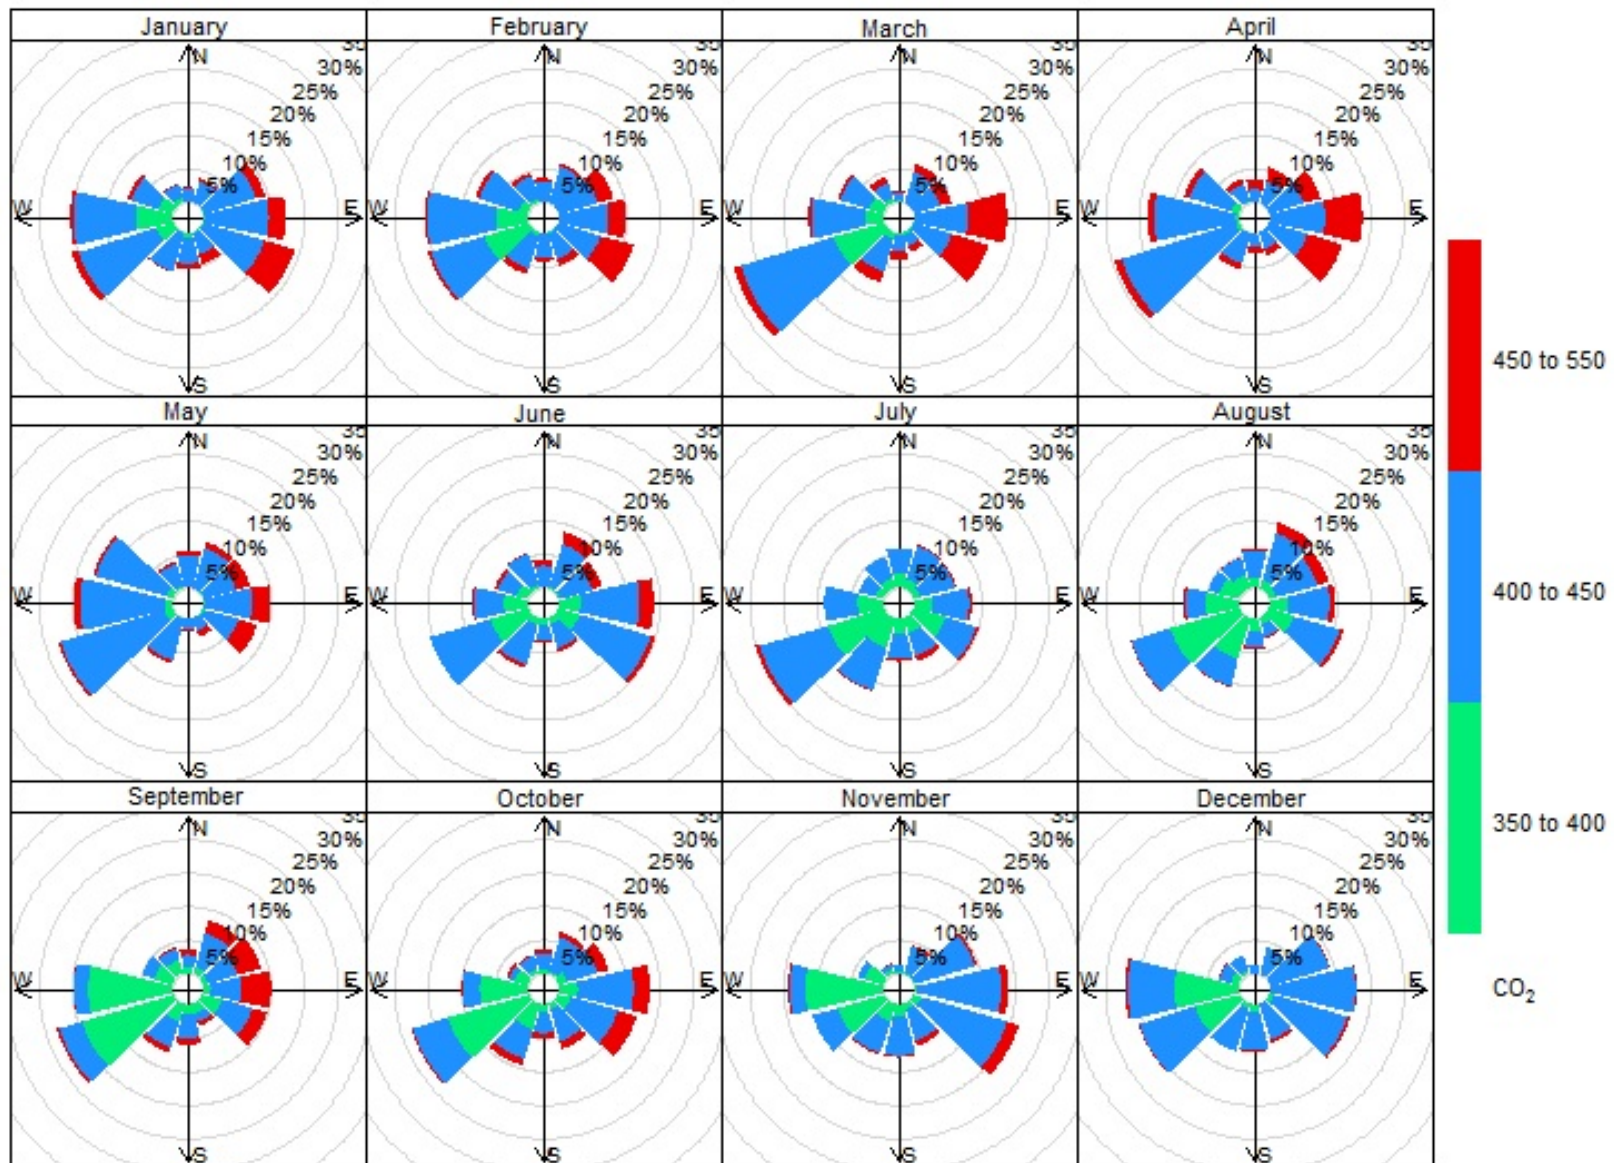

(c)

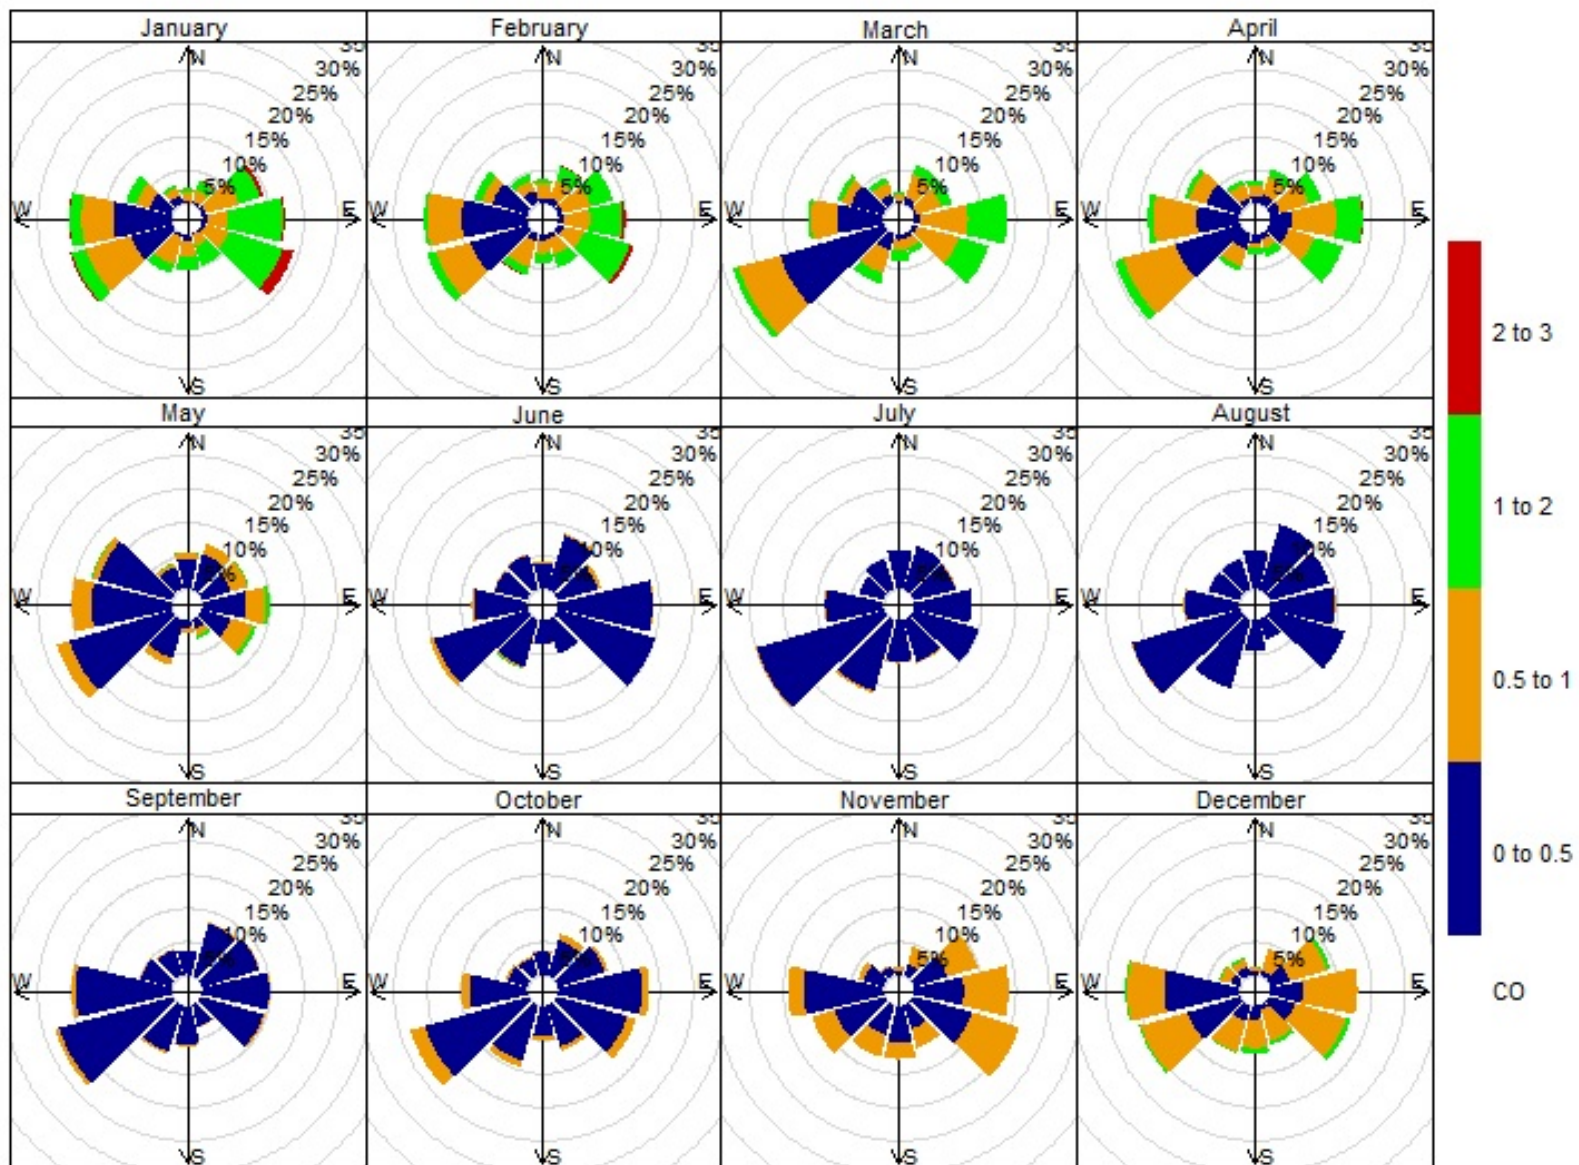



**Figure 4.** Relation between ~~Pollution rose of the hourly~~ CH<sub>4</sub> and CO<sub>2</sub> mixing ratios and wind direction observed at Bode in the Kathmandu Valley (a) CH<sub>4</sub>, ~~and~~ (b) CO<sub>2</sub> and (c) CO from March 2013 to February 2014. ~~Pollution rose~~The figure shows variations of ~~pollutants~~ CH<sub>4</sub>, CO<sub>2</sub> and CO mixing ratios based on frequency ~~of~~ counts ~~of~~ by wind direction (in %) as represented by circle. The color represents the different mixing ratios of the gaseous species. The units of CH<sub>4</sub>, ~~and~~ CO<sub>2</sub> and CO are in ppm.

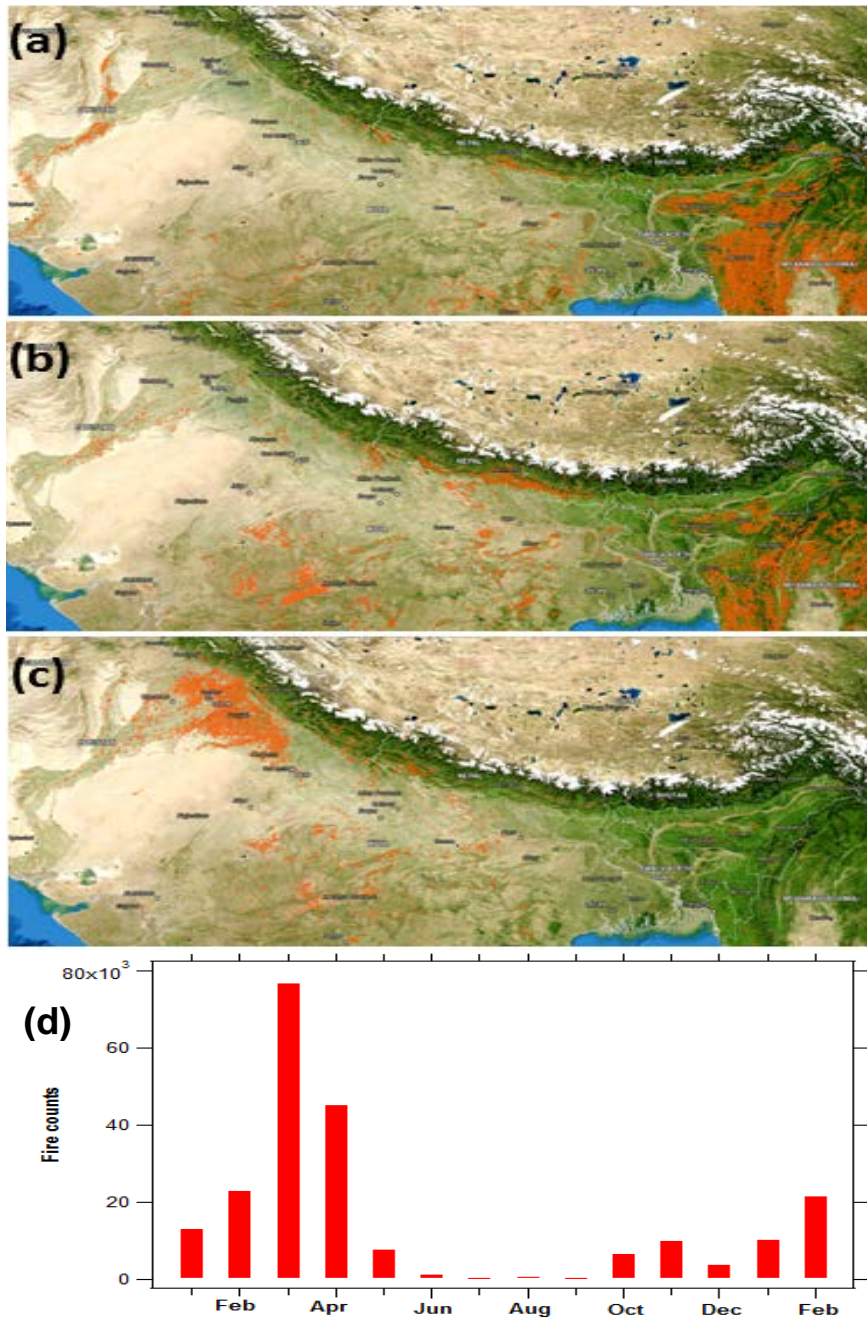

**Figure 5.** Satellite detected fire counts in (a) Mar, (b) Apr, (c) May 2013 in the broader region surrounding Nepal and (d) total number of fire counts detected by MODIS instrument onboard the Aqua satellite during Jan 2013-Feb 2014. Source: <https://firms.modaps.eosdis.nasa.gov/firemap/>

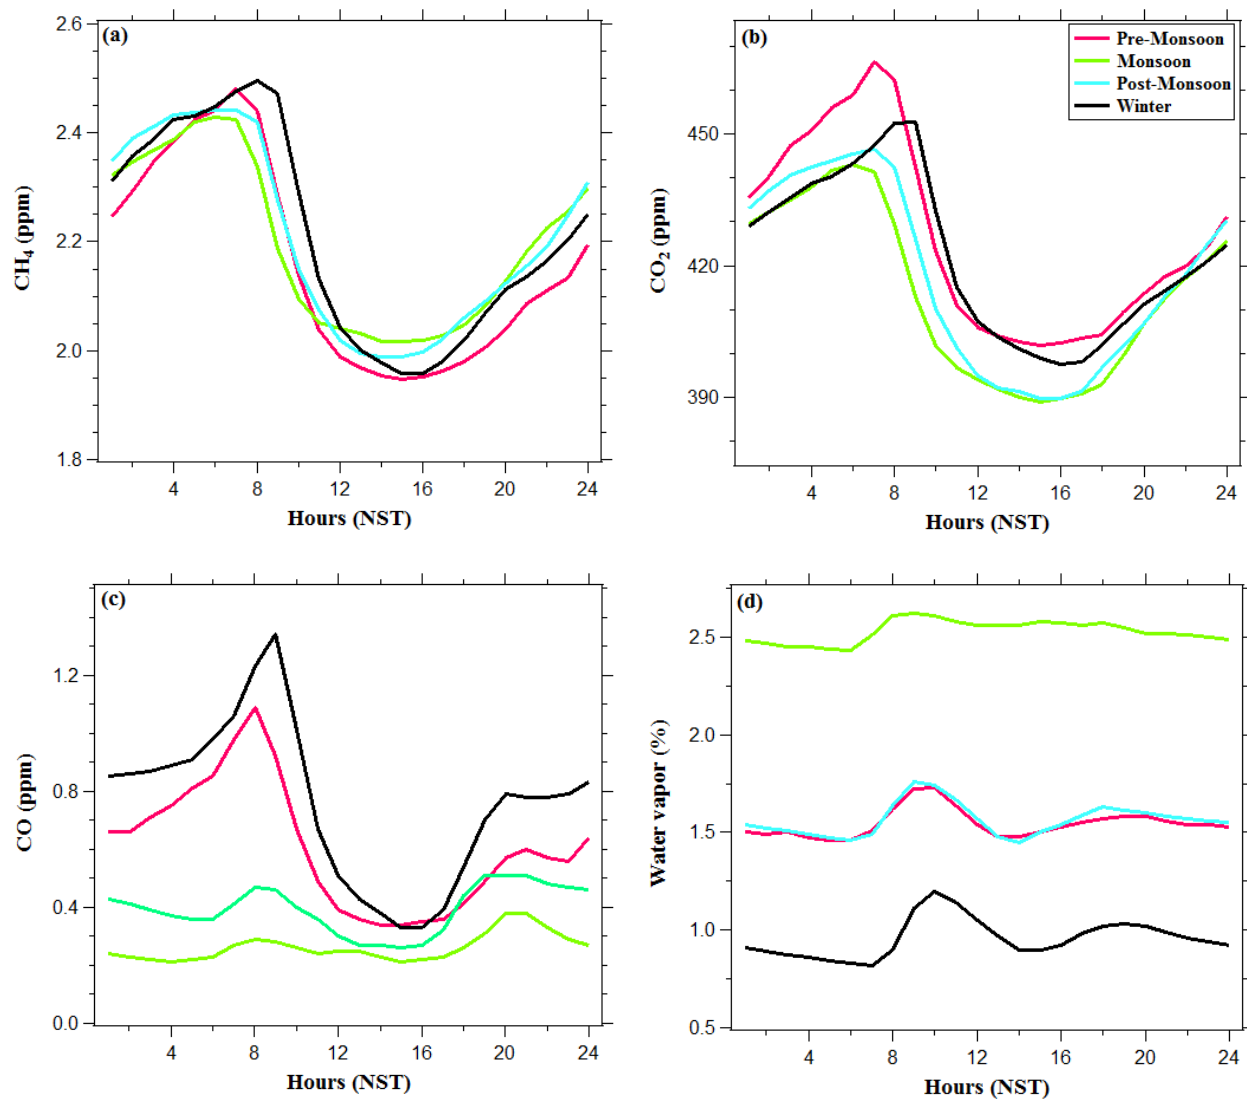

**Figure 6.** Diurnal variations of hourly mixing ratios in different seasons (a) CH<sub>4</sub>, (b) CO<sub>2</sub>, (c) CO, and (d) water vapor observed at Bode (semi-urban site) in the Kathmandu Valley during March 2013–February 2014. Seasons are defined as Pre-monsoon: Mar–May, Monsoon: Jun–Sep, Post-monsoon: Oct–Nov, Winter: Dec–Feb. The x axis is in Nepal Standard Time (NST).

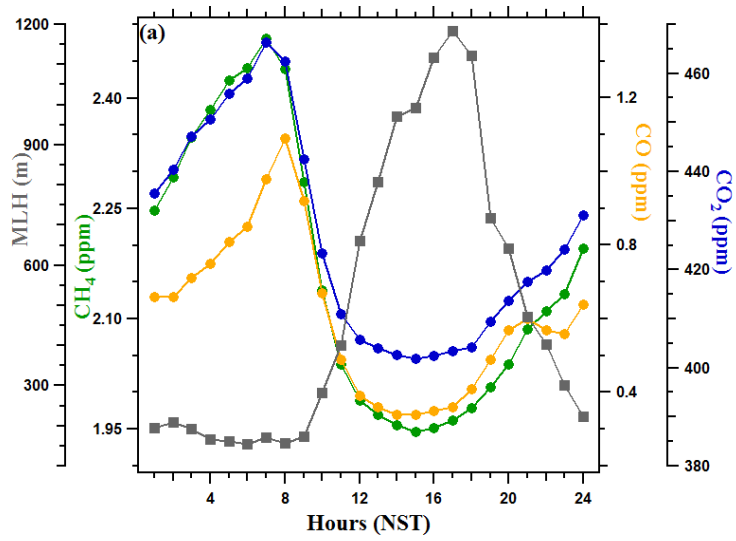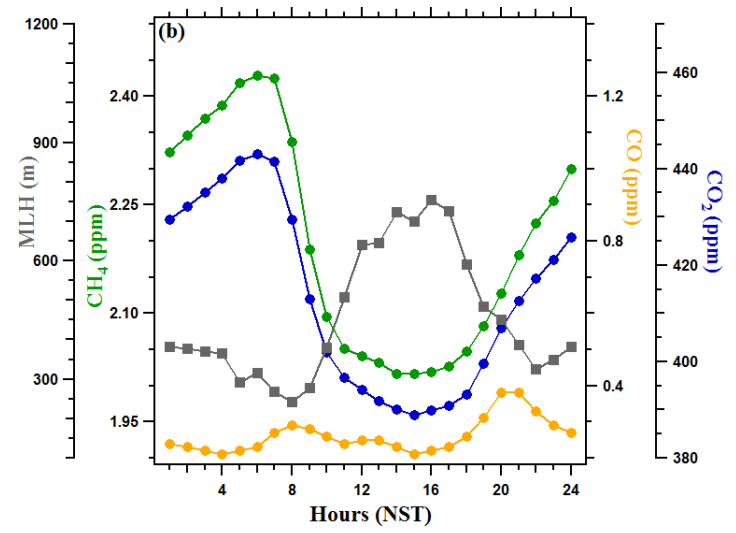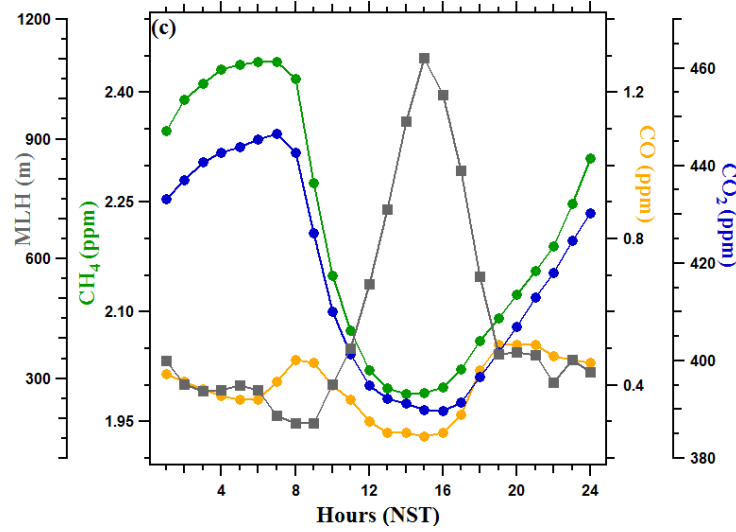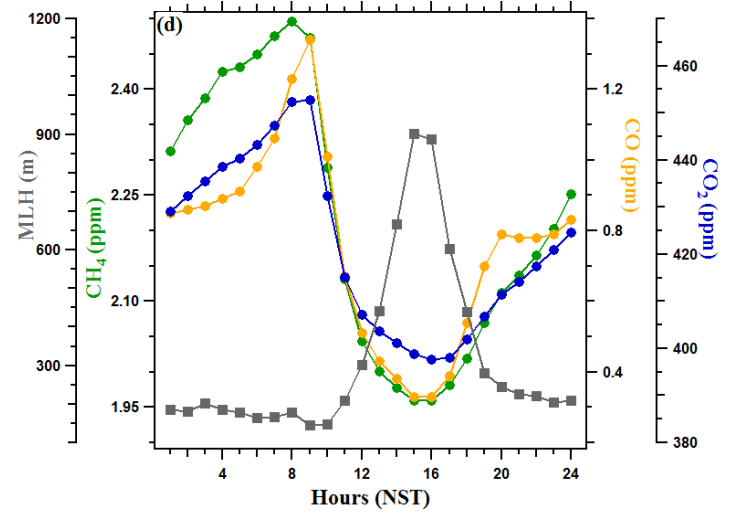

**Figure 7.** Diurnal variations of hourly mixing ratios of CH<sub>4</sub>, CO<sub>2</sub>, CO, and mixing layer height (MLH) at Bode (a semi-urban site in the Kathmandu Valley) in different seasons (a) pre-monsoon (Mar-May), (b) monsoon (Jun-Sep), (c) post-monsoon (Oct-Nov) and (d) winter (Dec-Feb) during March 2013- Feb 2014.

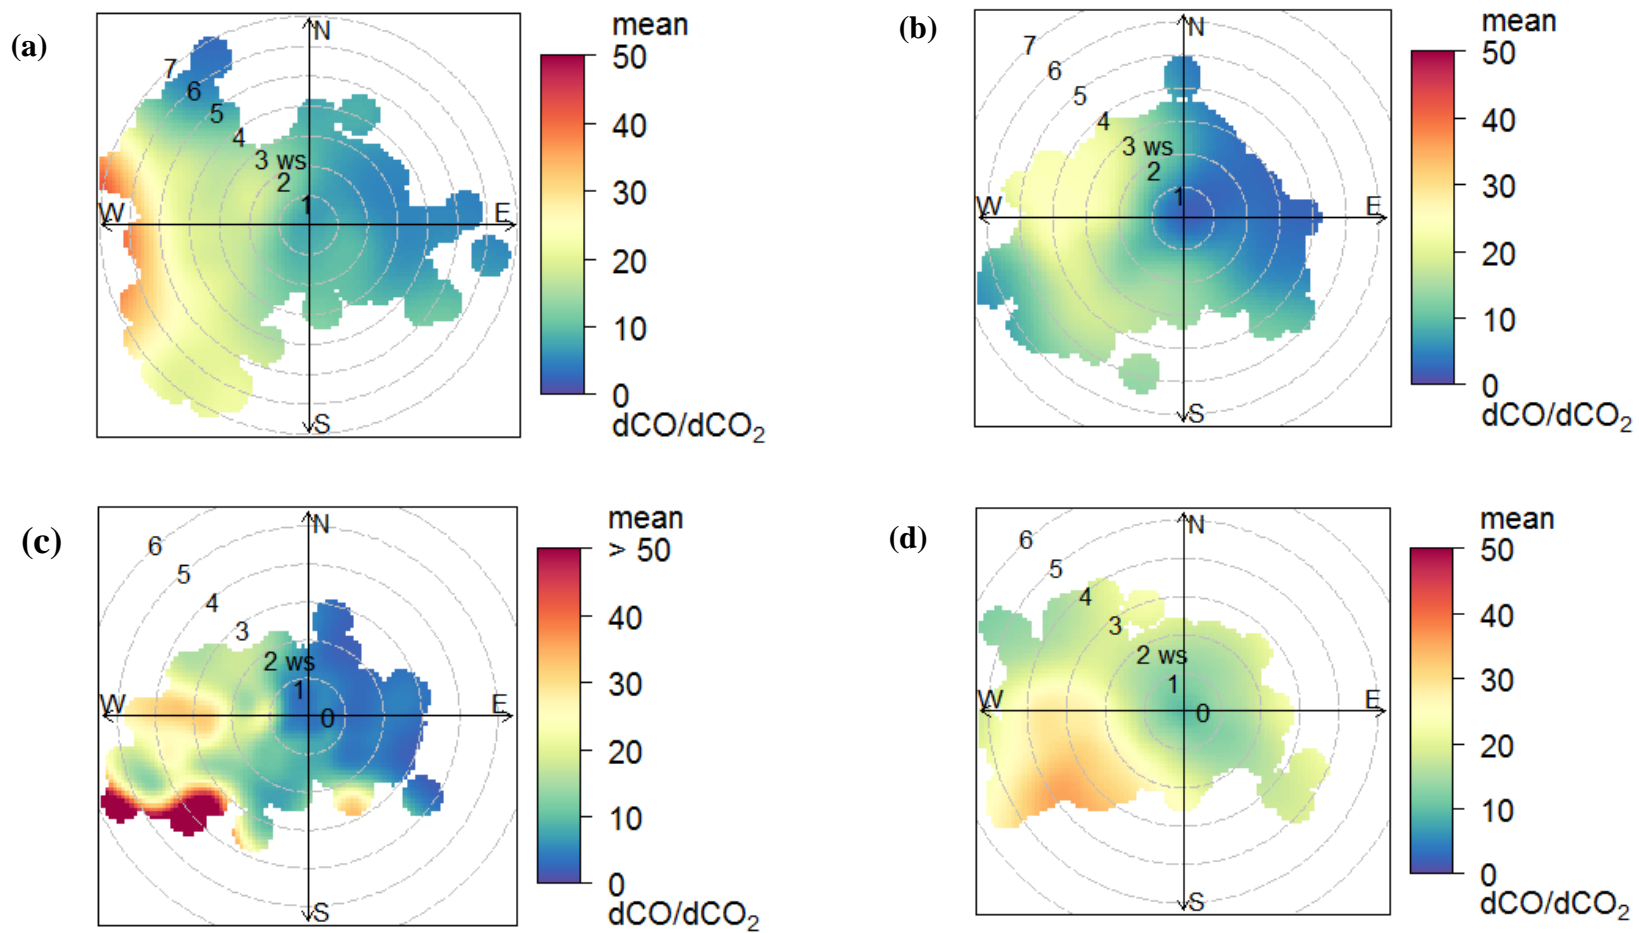

**Figure 8.** Seasonal polar plot of hourly  $dCO/dCO_2$  ratio based upon wind direction and wind speed: (a) pre-monsoon, (b) monsoon, (c) post-monsoon and (d) winter seasons.

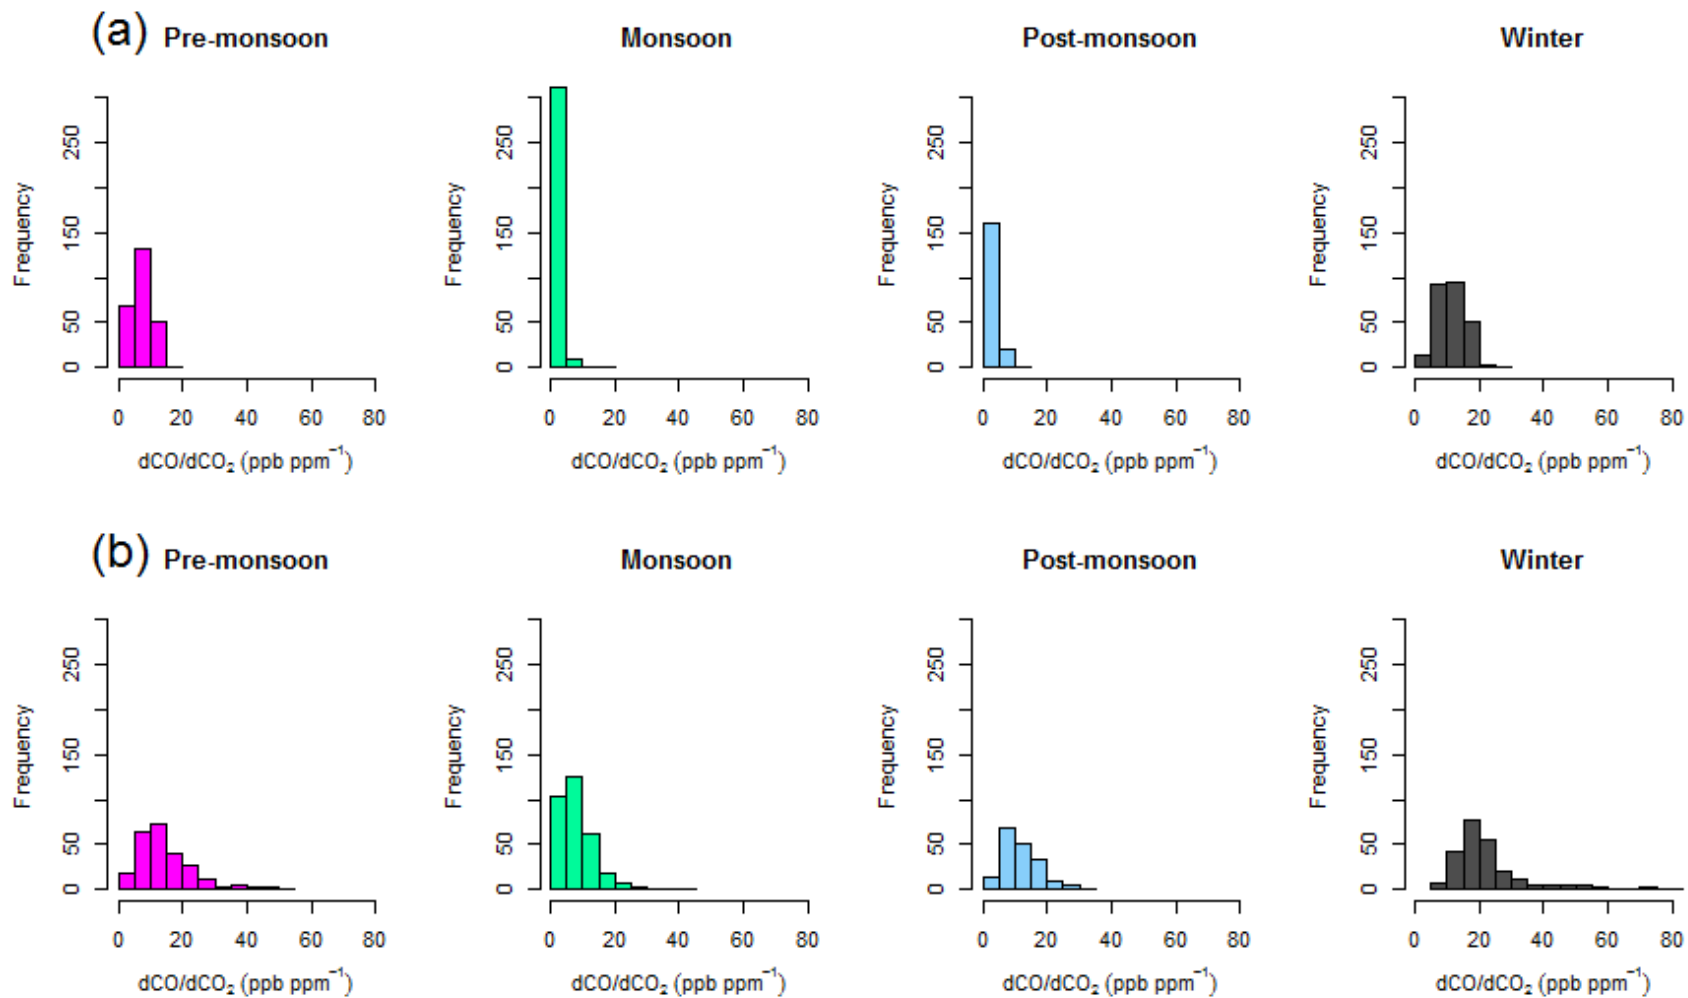

**Figure 9.** Seasonal frequency distribution of hourly dCO/dCO<sub>2</sub> ratio (a) morning hours (7:00-9:00) in all season except winter (8:00-10:00), (b) evening hours (19:00-21:00)

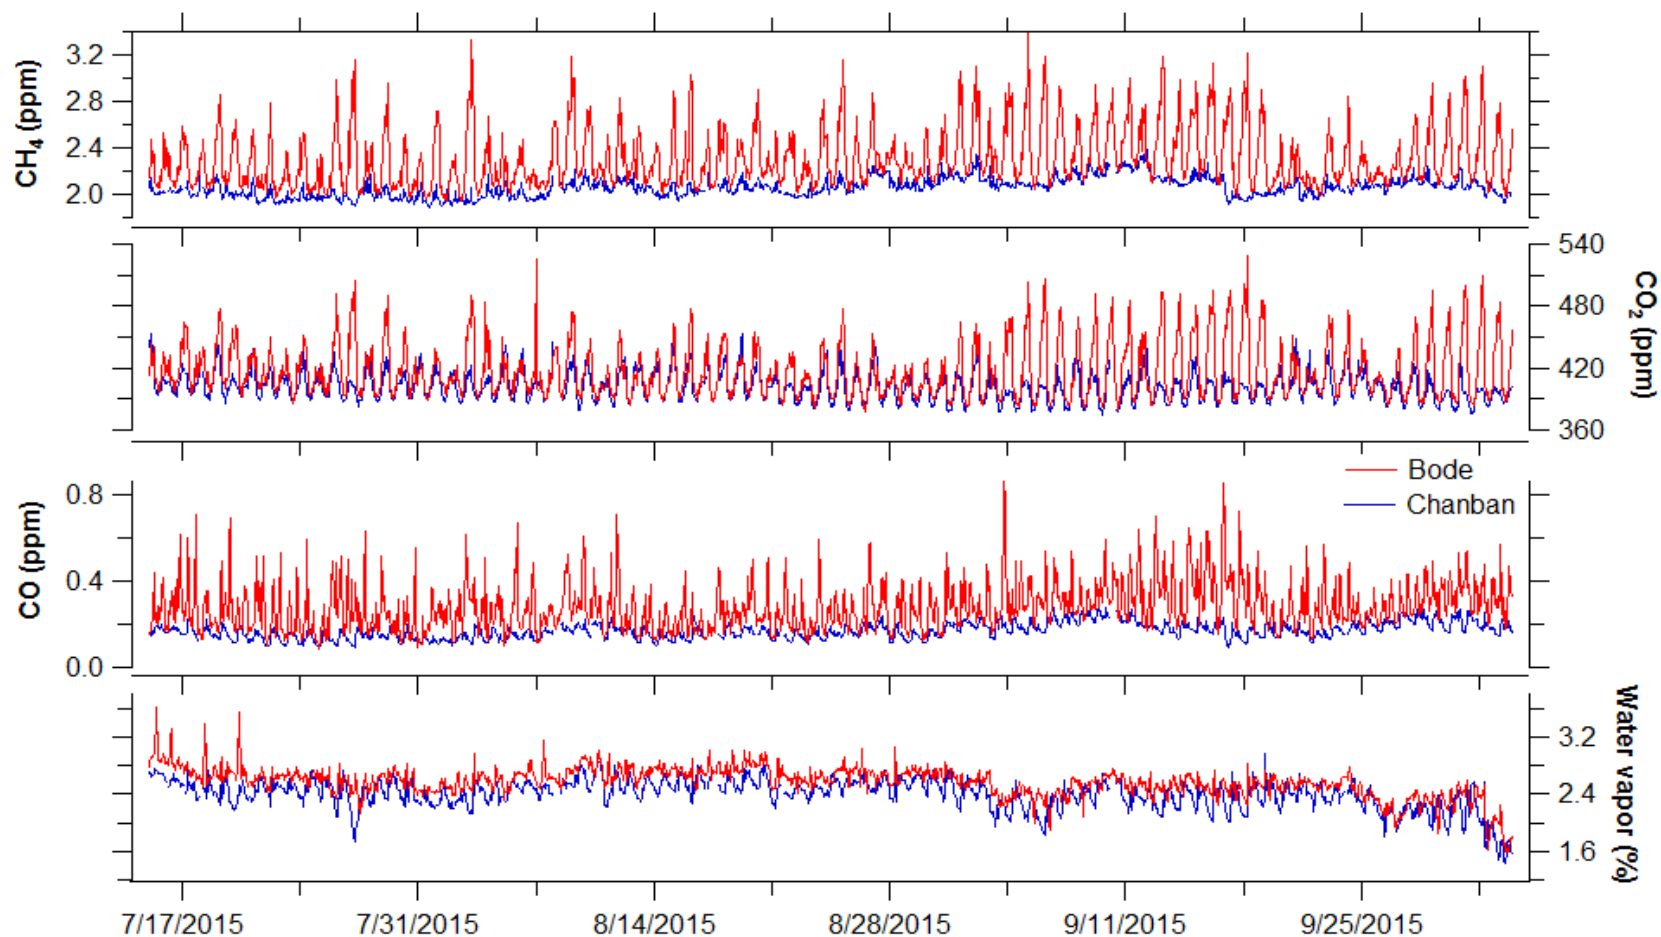

**Figure 10.** Comparison of hourly average mixing ratios of  $\text{CH}_4$ ,  $\text{CO}_2$ ,  $\text{CO}$ , and water vapor observed at Bode (a semi-urban site) in the Kathmandu Valley and at Chanban (a rural/background site) in Makawanpur district, ~ 20 km from Kathmandu, on other side of a tall ridge.



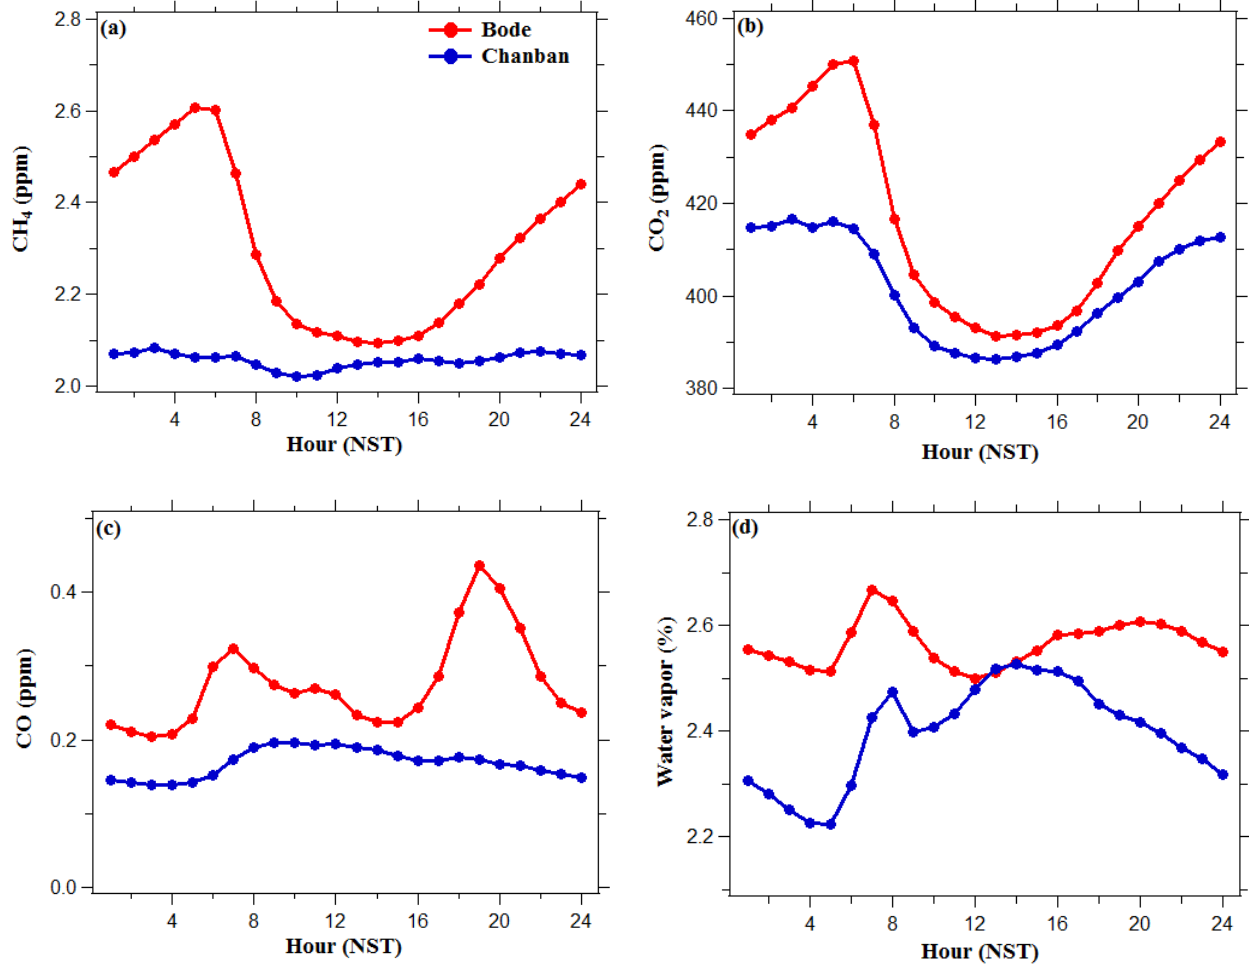

**Figure 11.** Diurnal variations of hourly average mixing ratios of (a) CH<sub>4</sub>, (b) CO<sub>2</sub>, (c) CO and (d) water vapor observed at Bode in the Kathmandu Valley and at Chanban in Makawanpur district during 15 July- 03 October 2015.
